# Supplementary material for: Theoretical insight into the origins of chemo- and diastereo-selectivity in the palladium-catalysed (3 + 2) cyclisation of 5-alkenyl thiazolones
Source: Royal Society of Chemistry journal article supplement (doi:10.1039/d1qo01071a), 2021-01-01
Supplement: d1qo01071a2.pdf [file d1qo01071a2.pdf]

## Supplementary Information

### Theoretical Insight into the Origins of Chemo- and Diastereoselectivity in the Palladium-Catalyzed (3+2) Cyclization of 5-Alkenyl Thiazolones

Ting Qi,<sup>a</sup> Shuai Fu,<sup>b</sup> Xiang Zhang,<sup>a</sup> Ting-Hao Liu,<sup>b</sup> Qing-Zhu Li,<sup>a</sup> Chuan Gou,<sup>a</sup> Jun-Long Li<sup>\*a</sup>

<sup>a</sup>*Antibiotics Research and Re-evaluation Key Laboratory of Sichuan Province, Sichuan Industrial Institute of Antibiotics, School of Pharmacy, Chengdu University, Chengdu 610106, People's Republic of China*

<sup>b</sup>*College of Chemical Engineering, Sichuan University, Chengdu, Sichuan, 610065, P.R. China*

\*Email: [lijunlong709@hotmail.com](mailto:lijunlong709@hotmail.com);

## Table of Contents

|                                                                                     |    |
|-------------------------------------------------------------------------------------|----|
| 1. Formation of $L_n$ -Pd-1a ( $L = PPh_3$ , $n = 1-3$ ) coordinated complexes..... | 3  |
| 2. Reactivity index analysis for substrates.....                                    | 4  |
| 3. Isomers of products 3a and 4a.....                                               | 5  |
| 4. Formation Mechanisms of product 4a along $C4''$ -selectivity pathways.....       | 8  |
| 5. DFT-Optimized geometries for transition states.....                              | 10 |
| 6. Atom in Molecule (AIM) analysis for key species.....                             | 13 |
| 7. Noncovalent interaction (NCI) analysis for C–O bond formation.....               | 15 |
| 8. Arrhenius plots of rate constants for the crucial reaction steps.....            | 16 |
| 9. Comparison of energies for the formation of products 3a and 3a'.....             | 19 |
| 10. Turnover Frequency (TOF) analysis for whole catalytic cycle.....                | 20 |
| 11. Activation strain analysis for the crucial reaction steps.....                  | 21 |
| 12. Energies and Gibbs free energies for all species.....                           | 23 |
| 13. A supplement for the Computational details section.....                         | 32 |
| 14. Cartesian coordinates of all the optimized structures.....                      | 35 |
| 15. References.....                                                                 | 96 |

## 1. Formation of $L_n$ -Pd-1a ( $L = PPh_3$ , $n = 1-3$ ) coordinated complexes

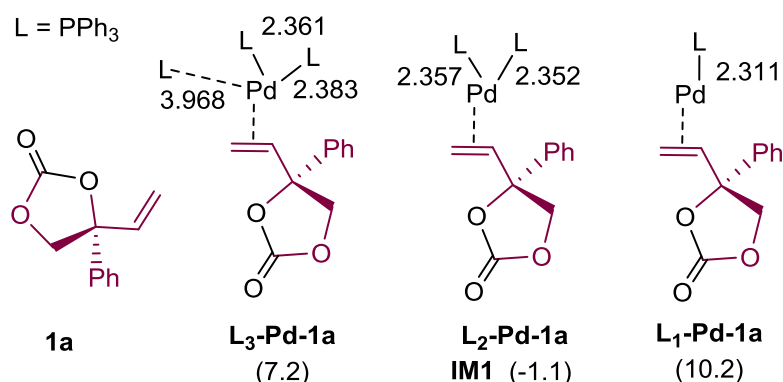

**Figure S1.** Possible coordinated complexes  $L_n$ -Pd-1a ( $L = PPh_3$ ,  $n = 1-3$ ) and the relative Gibbs free energy ( $\Delta G$ , kcal mol<sup>-1</sup>) relative to the vinyl ethylene carbonate **1a** and Pd( $PPh_3$ )<sub>4</sub> catalyst at the M06-L/6-311++G(d,p),SDD\*(PCM-SMD,DCM)//M06-L/6-31G(d),SDD\*(PCM-SMD,DCM) level. Selected distances shown are in angstrom (Å). These are the same in the following figures.

First of all, the possible coordinated complexes  $L_n$ -Pd-1a ( $n = 1-3$ ) formed between vinyl ethylene carbonate **1a** and Pd( $PPh_3$ )<sub>4</sub> catalyst have been investigated. This can be expressed by the following chemical reaction:

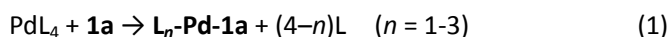

As shown in Figure S1, when the vinyl moiety of substrate **1a** coordinates to the Pd center in Pd( $PPh_3$ )<sub>4</sub>, a ligand exchange reaction takes place, leading to the  $L_3$ -Pd-1a complex. This reaction is calculated to be endergonic by 7.2 kcal mol<sup>-1</sup> ( $n = 3$  in the reaction (1)). Upon optimization, one phosphine ligand ( $L = PPh_3$ ) in the  $L_3$ -Pd-1a dissociates from the Pd center with the Pd-P distance of 3.968 Å, because of steric hindrance. Next,  $L_3$ -Pd-1a releases the L ligand free, leaving a Pd( $PPh_3$ )<sub>2</sub>-containing molecular complex  $L_2$ -Pd-1a, with the exoergicity of 8.3 kcal mol<sup>-1</sup>. Afterwards, the third L free is released from  $L_2$ -Pd-1a, the  $\Delta G$  of formed  $L_1$ -Pd-1a increases by 11.3 kcal mol<sup>-1</sup>. In short, the  $L_2$ -Pd-1a (**IM1**) containing two phosphine ligands is the energetically most favorable active species, with the stabilization energy of 1.1 kcal mol<sup>-1</sup> ( $n = 2$  in the reaction (1)). This result is in good accordance with both the experimental and theoretical investigations, in which [Pd<sup>0</sup>( $PPh_3$ )<sub>2</sub>] complex is the most preferred form to enter catalytic cycles in solution.<sup>1</sup>

## 2. Reactivity index analysis for substrates

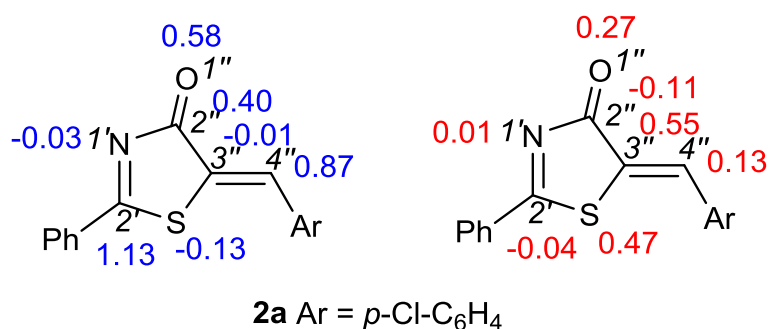

**Figure S2.** The reactivity index analysis from Parr functions for the reactivity sites of 5-alkenyl thiazolone **2a**. The blue values are the corresponding local electrophilic index  $\omega_k$  (eV) of the atoms. The red values are the corresponding local nucleophilic index  $N_k$  (eV) of the atoms.

When the **2a** reacts with the palladacyclic species, there are mainly two reactive moieties, *i.e.*, aza-thioester moiety and  $\alpha,\beta$ -unsaturated carbonyl moiety.

As shown in Figure S2, for aza-thioester moiety, local electrophilic indexes ( $\omega_k$ ) of C2' and N1' atoms are 1.13 and  $-0.03$  eV, respectively, basing on the reactivity index analysis from Parr functions. It is indicated that C2' atom in the aza-thioester moiety possesses the larger  $\omega_k$ , which should be the more favorable active site by the electrophilic attack of six-membered palladacyclic species.

For  $\alpha,\beta$ -unsaturated carbonyl moiety, local electrophilic indexes ( $\omega_k$ ) of O1'', C2'', C3'', and C4'' atoms are 0.58, 0.40,  $-0.01$ , and 0.87 eV, respectively. It is indicated that C4'' atom in the  $\alpha,\beta$ -unsaturated carbonyl moiety possesses the largest  $\omega_k$ , which should be the most favorable active site by the electrophilic attack of six-membered palladacyclic species.

### 3. Isomers of products 3a and 4a

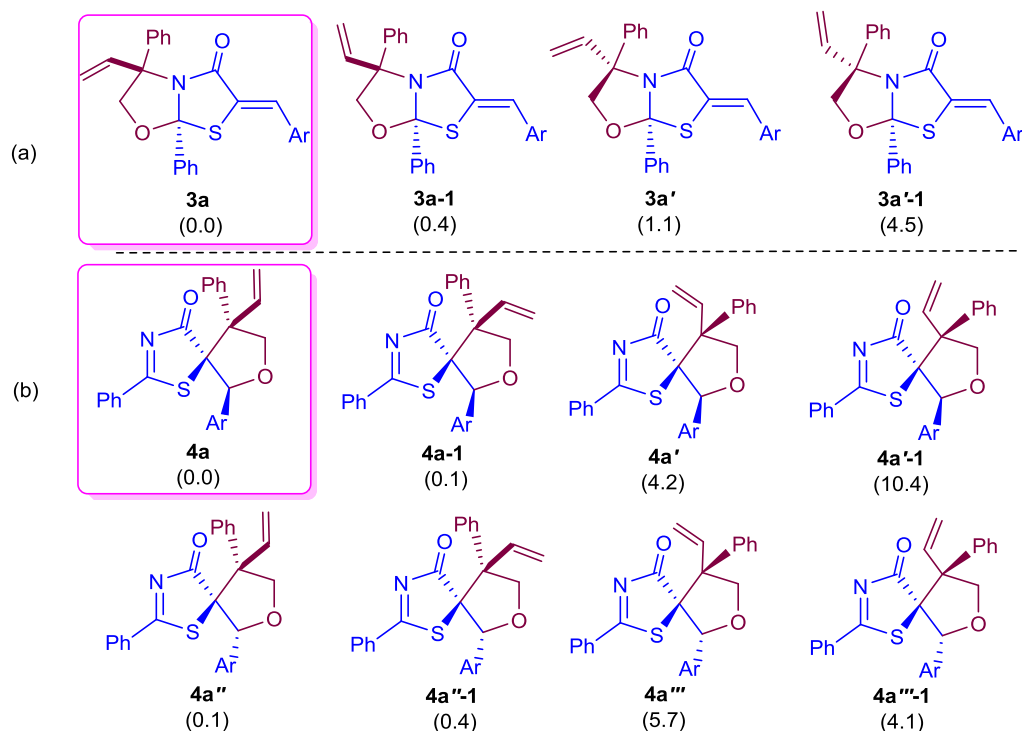

**Figure S3.** Isomers of bicyclic product **3** with the relative Gibbs free energies (kcal mol<sup>-1</sup>) relative to **3a** (a) and isomers of spirocyclic product **4** with the relative Gibbs free energies (kcal mol<sup>-1</sup>) relative to **4a** (b) at the M06-L/6-311++G(d,p),SDD\*(PCM-SMD,DCM)//M06-L/6-31G(d),SDD\*(PCM-SMD,DCM) level.

As depicted in Figure S3, for bicyclic product **3**, there are four isomers, *i. e.* **3a**, **3a-1**, **3a'**, and **3a'-1**. The relative Gibbs free energies increase as **3a** < **3a-1** < **3a'** < **3a'-1** in the DCM solution. It is indicated that the **3a** is energetically the most preferred in the DCM solution. Wherein, **3a-1** is the conformer of predominant product **3a**. **3a** and **3a'** are diastereoisomers.

Alternatively, for spirocyclic product **4**, the relative Gibbs free energies increase as **4a** < **4a-1** = **4a''** < **4a''-1** < **4a'''-1** < **4a'** < **4a'''** < **4a'-1** in the DCM solution. That is to say, **4a** is thermodynamically the most preferable in the DCM solution. Wherein, the **4a'** and **4a''** are the diastereoisomer of **4a**. The **4a** is the isomer of predominant product **3a**. Thus, **4a** is selected as model product of spirocyclic product along *C4''-selectivity* reaction pathways.

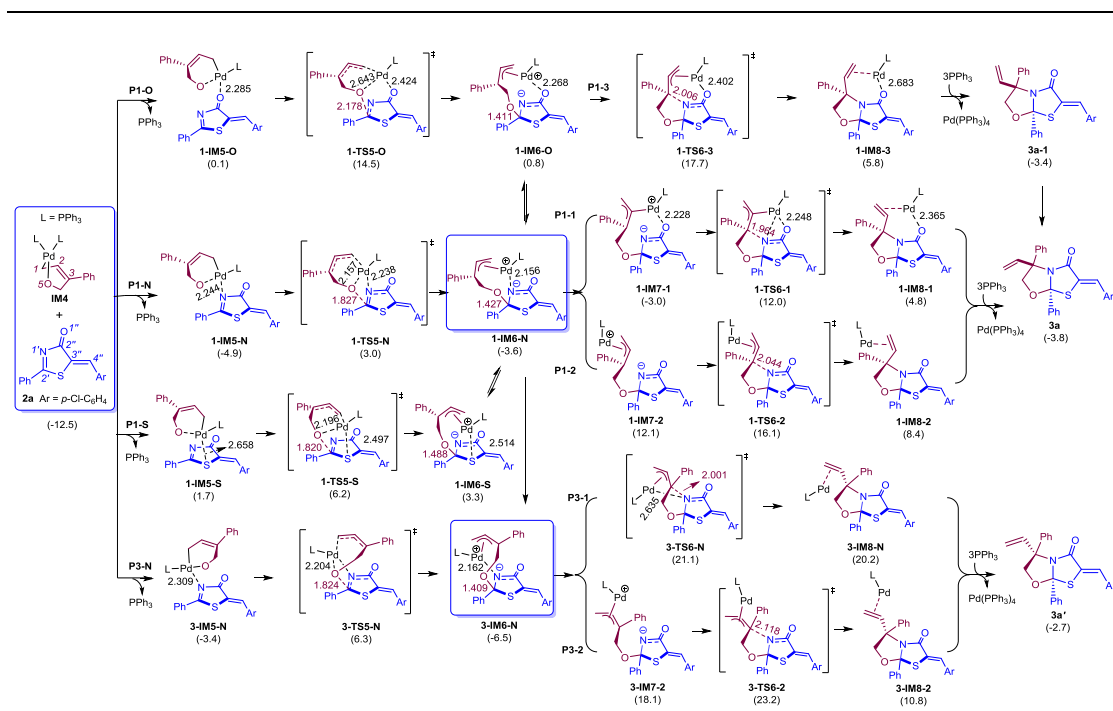

(a)

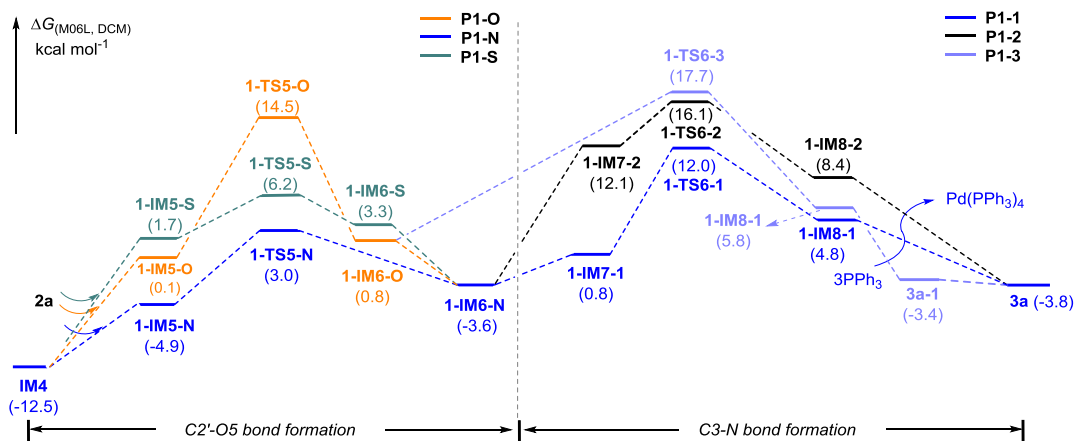

(b)

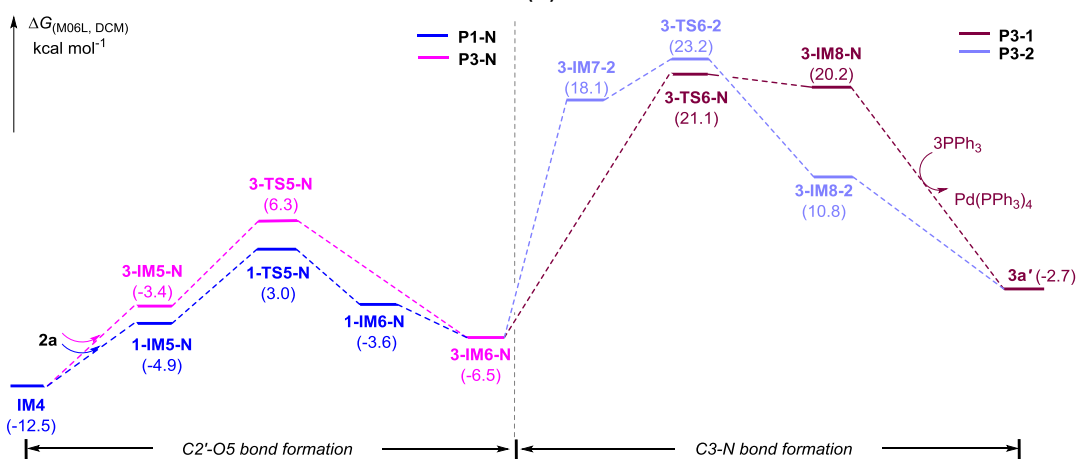

(c)

**Figure S4.** Schematic mechanisms and Gibbs free energy profiles for the formation of products **3a** (a and b) and **3a'** (a and c) catalyzed by the  $\text{Pd}(\text{PPh}_3)_4$  along  $\text{C}2'$ -selectivity reaction pathways. Selected distances shown are in angstrom ( $\text{\AA}$ ).

---

As shown in Figure S4 and Table S1, there are nine reaction pathways for the formation of **3a**, denoted as **P1a** (**P1-N** + **P1-1**), **P1a-1** (**P1-S** + **P1-1**), **P1a-2** (**P1-O** + **P1-1**), **P1b** (**P1-N** + **P1-2**), **P1b-1** (**P1-O** + **P1-2**), **P1b-2** (**P1-S** + **P1-2**), **P1c** (**P1-N** + **P1-3**), **P1c-1** (**P1-O** + **P1-3**), and **P1c-2** (**P1-S** + **P1-3**). The **P1a**, **P1a-1**, and **P1a-2** comprise the EHHP of 12.0 kcal mol<sup>-1</sup> at **1-TS6-1**, the HEB of 15.6 kcal mol<sup>-1</sup> at the reaction step of **1-IM6-N** → **1-TS6-1**. The **P1b**, **P1b-1**, and **P1b-2** involves the EHHP of 16.1 kcal mol<sup>-1</sup> at **1-TS6-2**, the HEB of 19.7 kcal mol<sup>-1</sup> at the reaction step of **1-IM6-N** → **1-TS6-2**. The reaction pathway **P1c** and **P1c-2** includes the EHHP of 17.7 kcal mol<sup>-1</sup> at **1-TS6-3**, the HEB of 21.3 kcal mol<sup>-1</sup> at the reaction step of **1-IM6-N** → **1-TS6-3**. The **P1c-1** includes the EHHP of 17.7 kcal mol<sup>-1</sup> at **1-TS6-3**, the HEB of 16.9 kcal mol<sup>-1</sup> at the reaction step of **1-IM6-O** → **1-TS6-3**. The the exoergicity of **3a** formation is 3.8 kcal mol<sup>-1</sup>. The above computed results indicate **P1a** kinetically favourable reaction pathway.

Alternatively, for the formation of **3a'**, the MERP should be made of **P1-N** and **P3-1**, denoted as **P3a**. The detailed reaction pathway of **P3a** is almost similar to that of **P1a**. The reaction pathway **P3a** possesses the EHHP of 21.1 kcal mol<sup>-1</sup> at **3-TS6-N**, the HEB of 27.6 kcal mol<sup>-1</sup> at the reaction step of **3-IM6-N** → **3-TS6-N**, and the exoergicity of 2.7 kcal mol<sup>-1</sup>.

Compared with **P3a**, the reaction pathway **P1a** involves lower EHHP (12.0 vs 21.1 kcal mol<sup>-1</sup>), lower HEB (15.6 vs 27.6 kcal mol<sup>-1</sup>) and higher exoergicity (3.8 vs 2.7 kcal mol<sup>-1</sup>). That is to say, the **P1a** proceeded preferentially and the desired **3a** is the energetically favoured product.

#### 4. Formation Mechanisms of product 4a along C4''-selectivity pathways

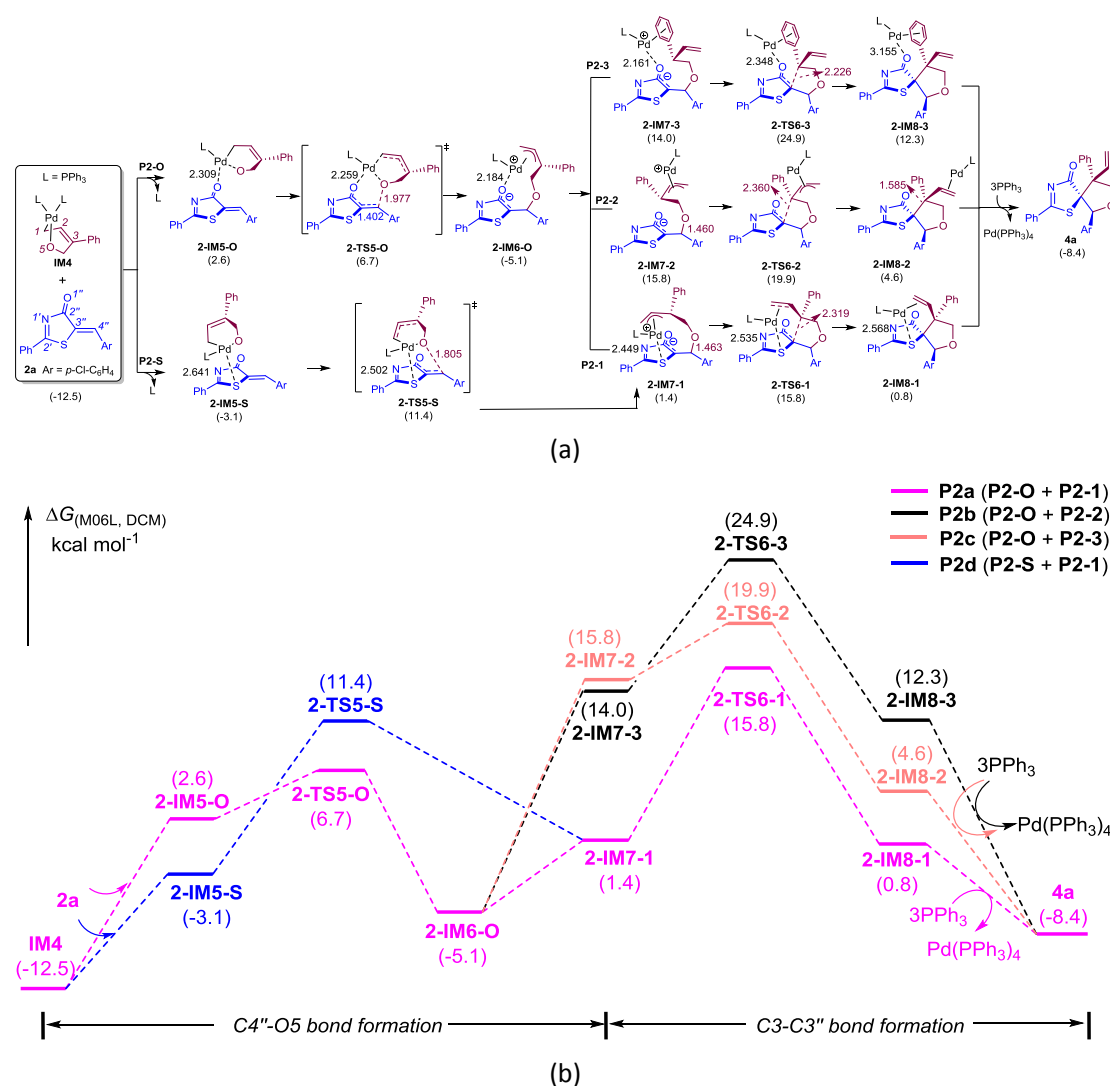

**Figure S5.** Schematic mechanism (a) and Gibbs free energy profiles (b) for the formation of products **4a** catalyzed by the Pd(PPh<sub>3</sub>)<sub>4</sub> along C4''-selectivity reaction pathways. Relative Gibbs free energies ( $\Delta G$ , kcal mol<sup>-1</sup>) relative to initial reactants are obtained at the M06-L/6-311++G(d,p),SDD\*(PCM-SMD,DCM)//M06-L/6-31G(d),SDD\*(PCM-SMD,DCM) level. Selected distances shown are in angstrom (Å).

The schematic mechanism and Gibbs free energy profiles for the formation of products **4a** along C4''-selectivity reaction pathways are depicted in Figure S5, respectively. When the heteroatom (X = O and S) of substrate **2a** coordinates to the Pd center of palladacyclic intermediate, there are three reaction pathways to form products **4a**, denoted as **P2a** (P2-O + P2-1), **P2b** (P2-O + P2-2), **P2c** (P2-O + P2-3), and **P2d** (P2-S + P2-1).

As shown in Figure S5, for **P2-O**, the four-coordination complex **2-IM5-O** with the Pd–O distance of 2.309 Å is initially formed by interacting with the O atom in substrate **2a** with metal Pd center of **IM4**. Next, the formation of C4''–O5 bond takes place *via* a chair-ten-membered **2-TS5-O** through a nucleophilic attack of the anionic O5 atom of palladacyclic moiety onto C4''



---

atom of **2a**, giving rise to a zwitterionic  $\pi$ -allyl-Pd complex **2-IM6-O** with the Pd–O distance of 2.184 Å. The energy barrier for this step is 4.1 kcal mol<sup>-1</sup>. After that, **2-IM6-O** is converted to  $\eta^2$ -coordination complexes **2-IM7-1** (O to S), **2-IM7-2** (inner-sphere to outer-sphere), and **2-IM7-3** ( $\pi$ -allyl  $\eta^3$  to  $\eta^2$ ) through the rearrangement of coordination atoms with the endoergicity of 6.5, 20.9, and 19.1 kcal mol<sup>-1</sup>, respectively. From **2-IM7-1**, the formation of C–C bond takes place *via* five-membered cyclic **2-TS6-1**, generating a complex **2-IM8-1** with the Pd–S chelating interaction and  $\eta^2$ -coordination of olefin group. From **2-IM7-2**, the formation of C–C bond occurs *via* five-membered cyclic **2-TS6-2** through outer-sphere mechanism, generating the Pd-L-containing complex **2-IM8-2**. On the other hand, from **2-IM7-3**, the formation of C–C bond occurs *via* a five-membered cyclic **2-TS6-3** passing through intramolecular allylic alkylation, which further affords to a complex **2-IM8-3** with the Pd–O chelating interaction and  $\eta^2$ -coordination of aryl group. Finally, in the presence of three PPh<sub>3</sub> molecules, **2-IM8-1**, **2-IM8-2**, and **2-IM8-3** release the product **4a** free, leaving the catalyst Pd(PPh<sub>3</sub>)<sub>4</sub> behind. Comparison of the energies (15.8, 19.9, vs 24.9 kcal mol<sup>-1</sup>) and structures of transition states **2-TS6-1**, **2-TS6-2**, and **2-TS6-3** indicated that the **P2a** *via* **2-TS6-1** is more favorable pathway. This can be attributed to the fact that there exist the lp- $\pi$  and CH- $\pi$  interactions between N atom and –CH moiety as well as aryl groups in the **2-TS6-1** (See Figure S10). The **P2a** is predicted to exothermic by 8.4 kcal mol<sup>-1</sup>, which involves the EHHP of 15.8 kcal mol<sup>-1</sup> at **2-TS6-1** and the HEB of 20.9 kcal mol<sup>-1</sup> at the reaction step of **2-IM6-O** → **2-TS6-1**.

Alternatively, for **P2-S**, a four-coordination complex **2-IM5-S** with Pd–S chelating interaction is first formed by coordinating the S atom of **2a** with the Pd atom of **IM4**. Subsequent the C4''–O5 bond formation takes place *via* nine-membered cyclic **2-TS5-S**, yielding a **2-IM7-1**. The following reaction pathway is **P2-1**. It is obvious that, the pathway **P2-O** is kinetically more preferable than **P2-S**, because of its lower EHHP (6.7 vs 11.4 kcal mol<sup>-1</sup>) and lower HEB (19.2 vs 23.9 kcal mol<sup>-1</sup>) for the C4''–O5 formation step.

## 5. DFT-Optimized geometries for transition states

### (a) Competing C2'-O5 bond formation transition states along C2'-selectivity pathways

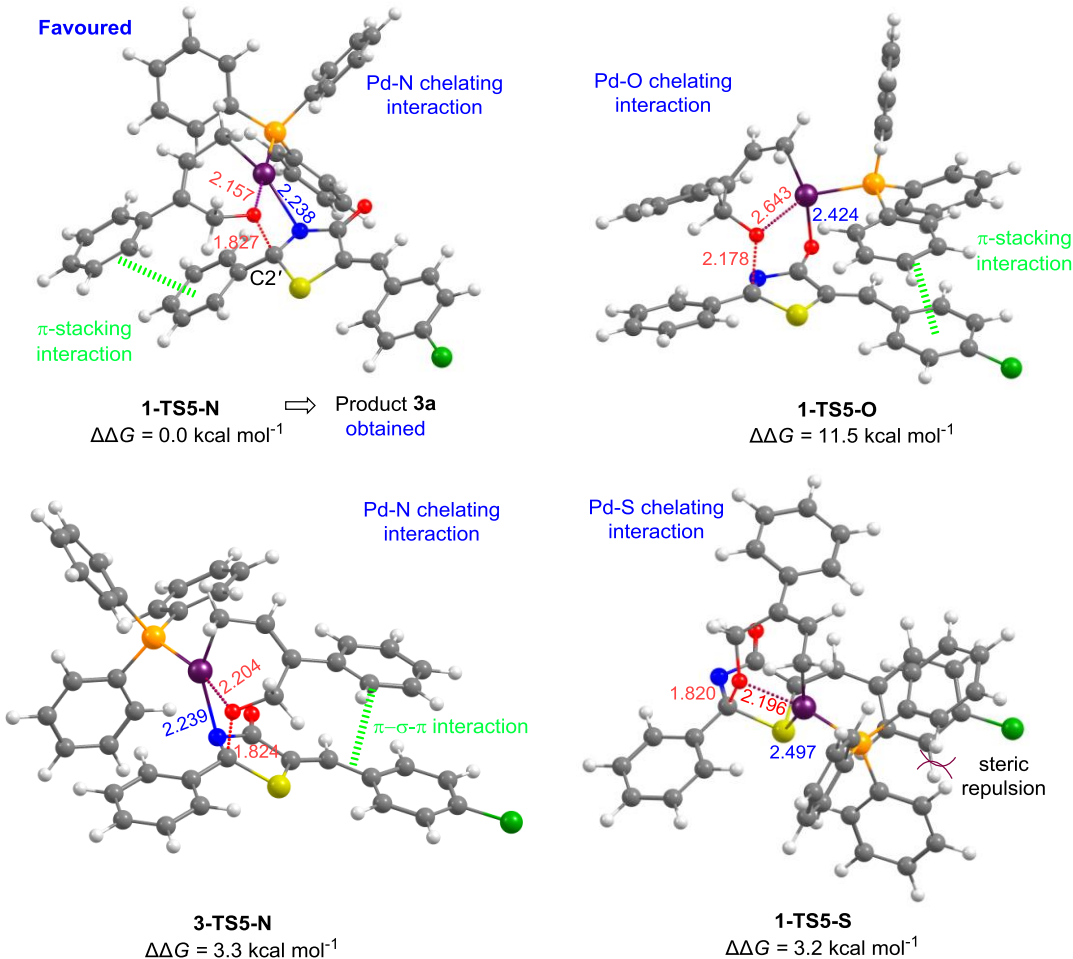

### (b) Competing C4''-O bond formation transition states along C4''-selectivity pathways

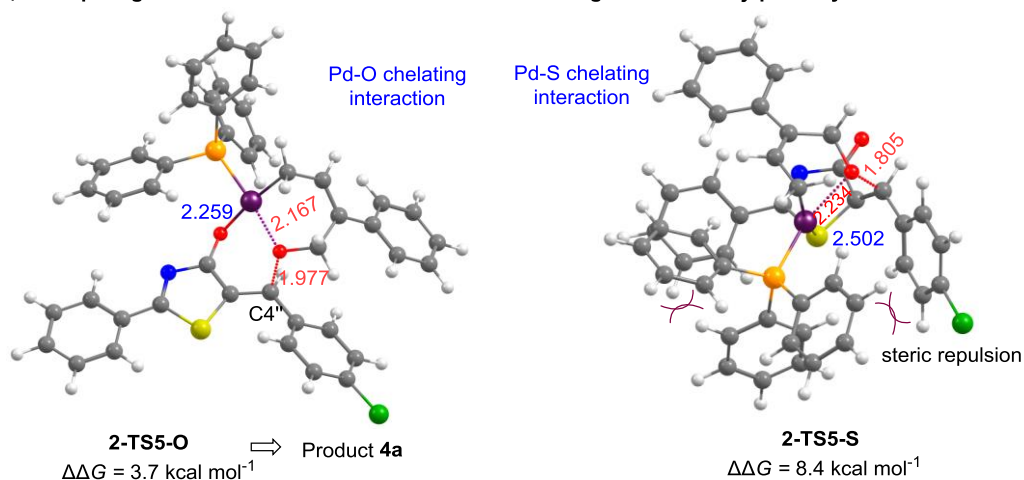

**Figure S6.** DFT-Optimized geometries and the difference in relative Gibbs free energies ( $\Delta\Delta G$ , kcal mol<sup>-1</sup>) of chemoselectivity- and diastereoselectivity-determining transition states in the presence of **2a**. (a) Competing C2'-O5 bond formation transition states. (b) Competing C4''-O bond formation transition states. Selected bond lengths are reported in Å. The visualized weak interaction is shown in Figure S10.

---

As depicted in Figure S6, **1-TS5-N** along the *C2'-selectivity* pathway to form major product **3a** is the most favorable among six competing transition states, which is consistent with the excellent chemoselectivity in experiments.<sup>2</sup> Comparing chemoselectivity-competing **1-TS5-N** and **2-TS5-O**, the favorable Pd–N chelation lead to the preference of **1-TS5-N**. In addition, in the presence of Pd–S chelation, there are the significant steric repulsions between the –PPh<sub>3</sub> group and the aromatic moieties of substrate **2a**, leading to unfavorable transition states **1-TS5-S** and **2-TS5-S**. Therefore, the Pd–X chelating effect plays a crucial role in the controlled chemoselectivity. The stronger Pd–X interactions have a larger chelation effect on C2'–O5 bond formation. Particularly, the Pd–N chelating interaction to avoiding the unfavorable steric repulsions and the favorable strong  $\pi$ -stacking effect are responsible for lower the relative Gibbs free energies ( $\Delta G$ ) in the chemoselectivity-determining step, facilitating the formation of predominant product **3a**.

(a) Competing C3–N bond formation transition states along C2'-selectivity pathways

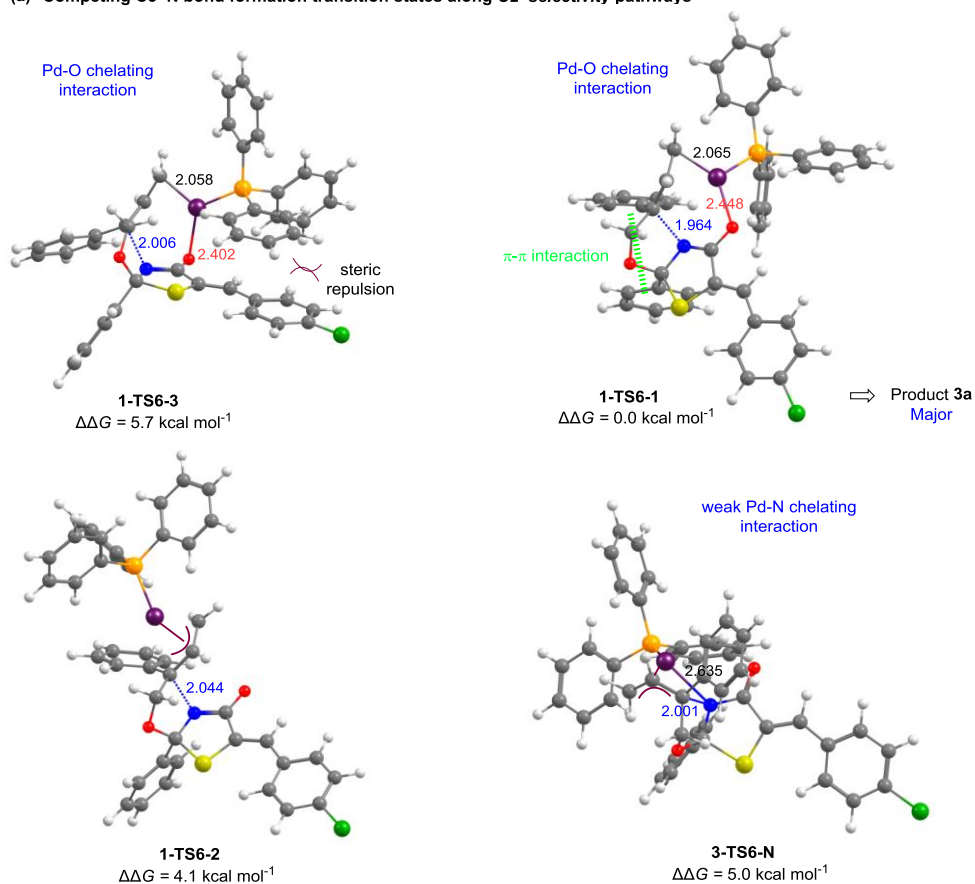

(b) Competing C3–C3'' bond formation transition states along C4''-selectivity pathways

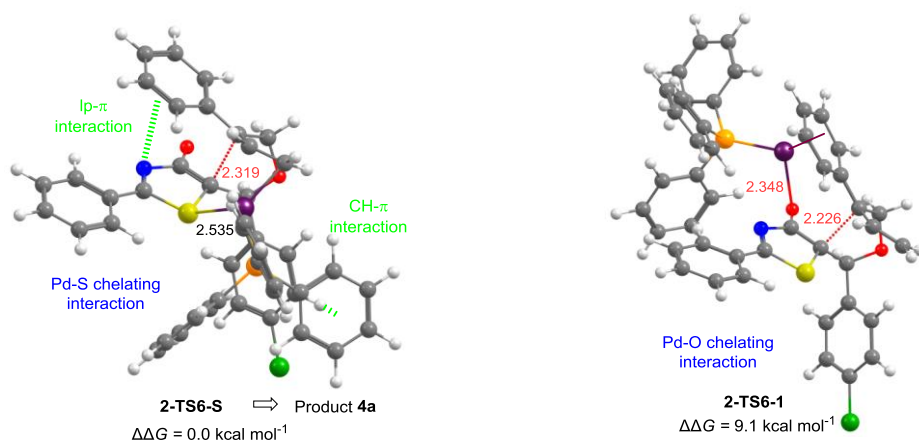

**Figure S7.** DFT-Optimized geometries and relative Gibbs free energies ( $\Delta G$ ,  $\text{kcal mol}^{-1}$ ) of rate-determining transition states. (a) Competing C3–N bond formation transition states. (b) Competing C3–C3'' bond formation transition states. Selected bond lengths are reported in Å.

## 6. Atom in Molecule (AIM) analysis for key species

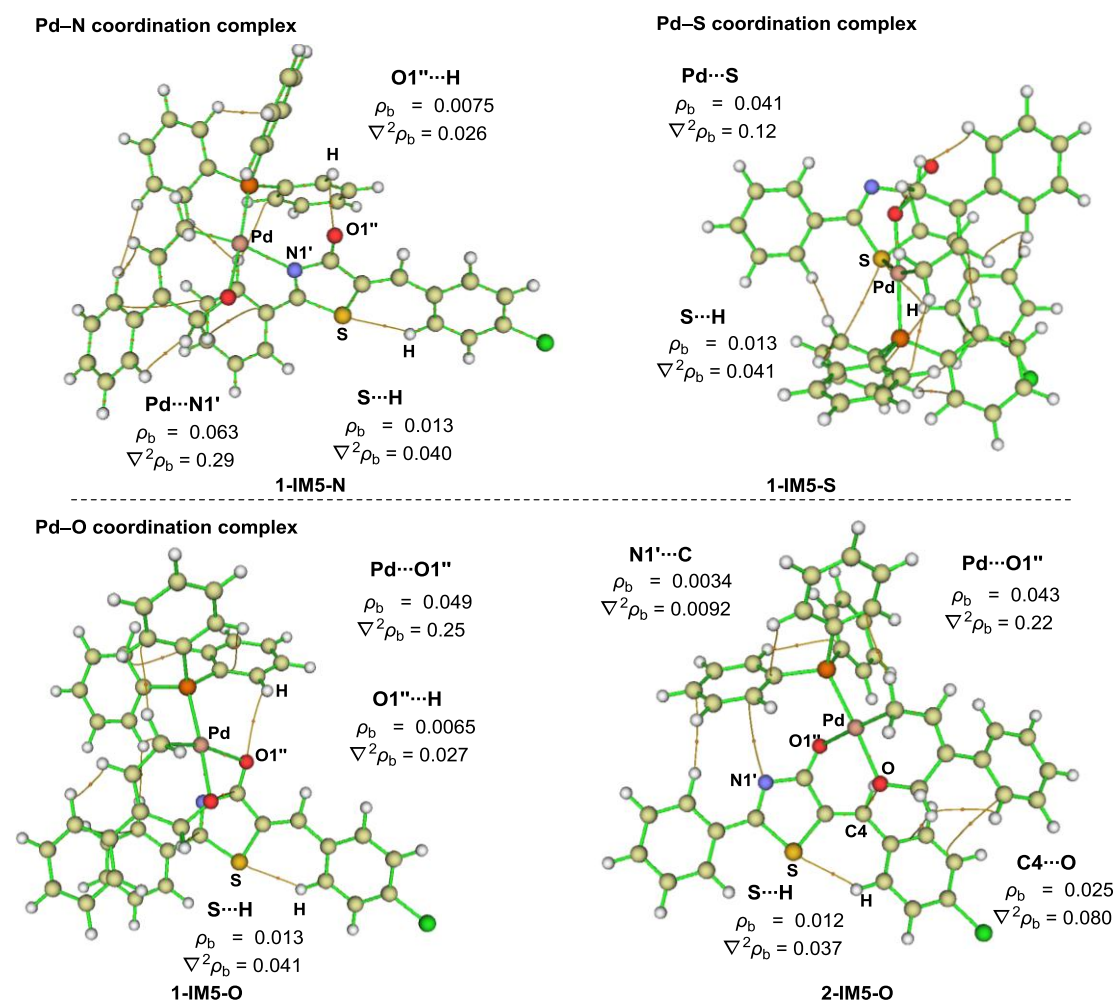

**Figure S8.** Density of all electrons ( $\rho$ ,  $e \text{ bohr}^{-3}$ ) and Laplacian of electronic density ( $\nabla^2\rho$ ,  $e \text{ bohr}^{-5}$ ) at the (3, -1) bond critical points (BCPs) of selected H-bonds and coordination bonds in Pd-X (X = N, O, and S) coordination complexes in the presence of **2a**, based on Atom in Molecule (AIM) analysis. Orange dots are BCPs.

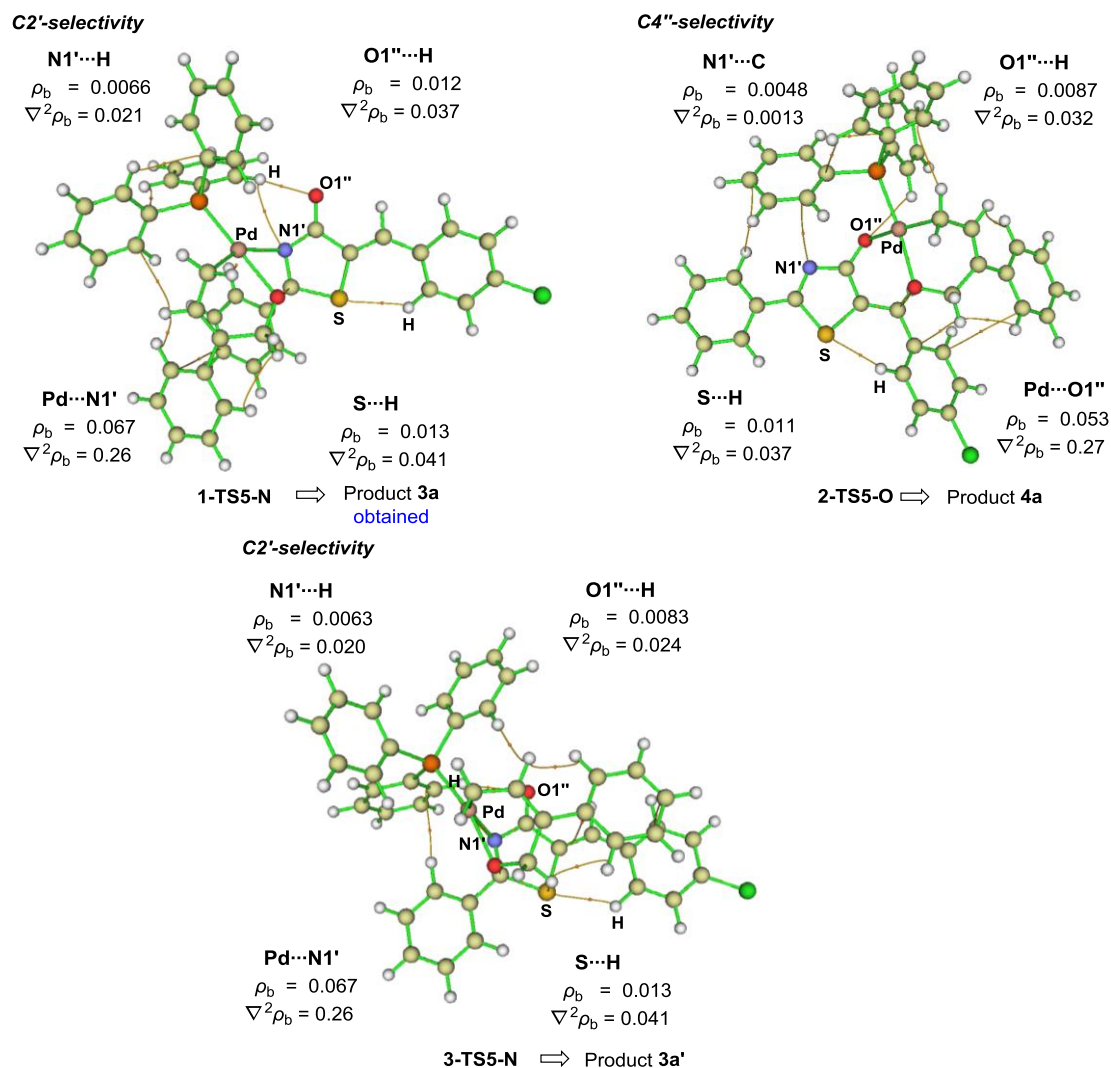

**Figure S9.** Density of all electrons ( $\rho$ ,  $e \text{ bohr}^{-3}$ ) and Laplacian of electronic density ( $\nabla^2\rho$ ,  $e \text{ bohr}^{-5}$ ) at the (3, -1) bond critical points (BCPs) of selected H-bonds and coordination bonds for chemoselectivity-determining and diastereoselectivity-determining transition states, based on Atom in Molecule (AIM) analysis. Orange dots are BCPs.

The values of the electronic density ( $\rho$ ) at the bond critical points (BCPs) correlate well with the bond distances: the shorter the bond, the larger the  $\rho$  value. The strength of H-bonds and coordination bonds in the species can be quantified by the value of the  $\rho$  on the corresponding BCP.<sup>3a,3b</sup>

Moreover, the predicted binding energies of H-bonds (HBs) in the neutral complexes were fitted using the following equation:<sup>3c</sup>

$$E(\text{HB}) = -223.08 \cdot \rho(\text{BCP}) + 0.7423 \text{ kcal mol}^{-1}$$

where  $\rho_{\text{BCP}}$  is the electron density at the bond critical point (BCP) of HBs ( $e \text{ Bohr}^{-3}$ ), obtained by Atom in Molecule (AIM) analysis.

## 7. Noncovalent interaction (NCI) analysis for C–O bond formation

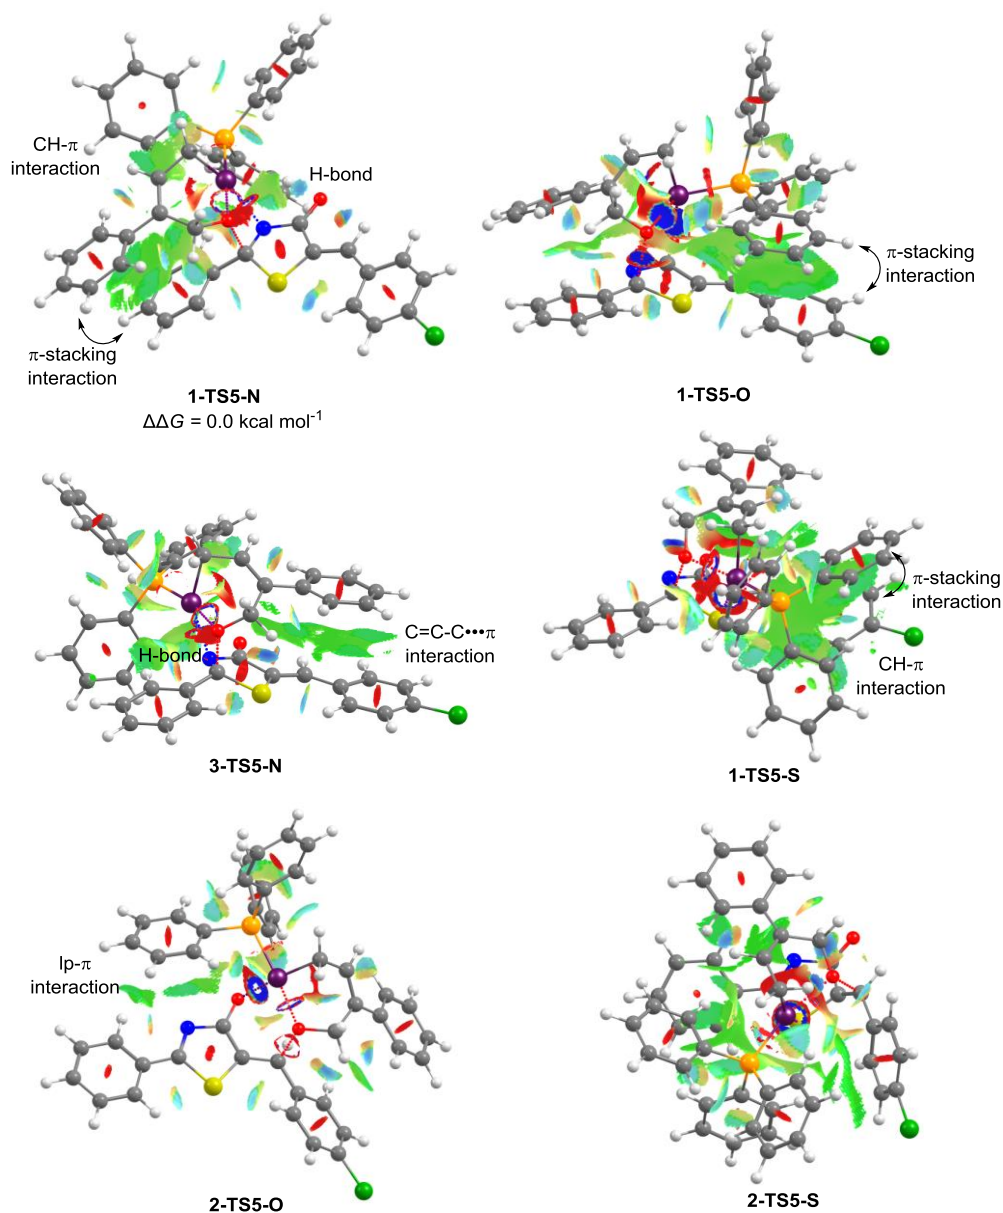

**Figure S10.** The non-covalent interactions for the six competing C–O bond formation transition states (isosurface value =  $0.50 e \text{ bohr}^{-3}$ ) in the presence of **2a**. The surfaces are coloured on a blue-green-red scale ranging from  $-0.02$  to  $0.02 e \text{ bohr}^{-3}$ . Blue, green, and red regions represent strong attractive interactions, Van der Waals interactions, and repulsive interactions, respectively. The green oval represents the favorable  $\pi$ -stacking interaction between two aromatic moieties.

Noncovalent interaction (NCI) analysis indicates that there exist the strong  $\pi$ -stacking and  $\pi$ - $\sigma$ - $\pi$  interactions between  $-\text{Ph}$  group and the aromatic moiety of **2a** in the transition states **1-TS5-N**, **1-TS5-O**, and **2-TS5-N**, which determines the selectivity of C2'-selectivity active sites in the **2a**. Herein, the  $\Delta\Delta G$  of two coordination-competing **1-TS5-N** and **1-TS5-O** is  $11.5 \text{ kcal mol}^{-1}$  in the C2'-selectivity. This may be ascribed to the chelating ability of Pd–X (X = N, O, S). As mentioned earlier, the binding strength of Pd–N in **1-TS5-N** is stronger than that of Pd–O chelation in **1-TS5-O**.

## 8. Arrhenius plots of rate constants for the crucial reaction steps

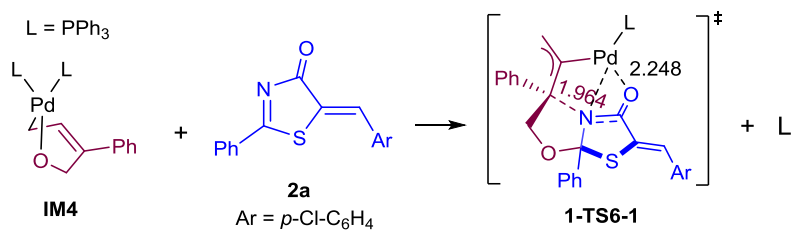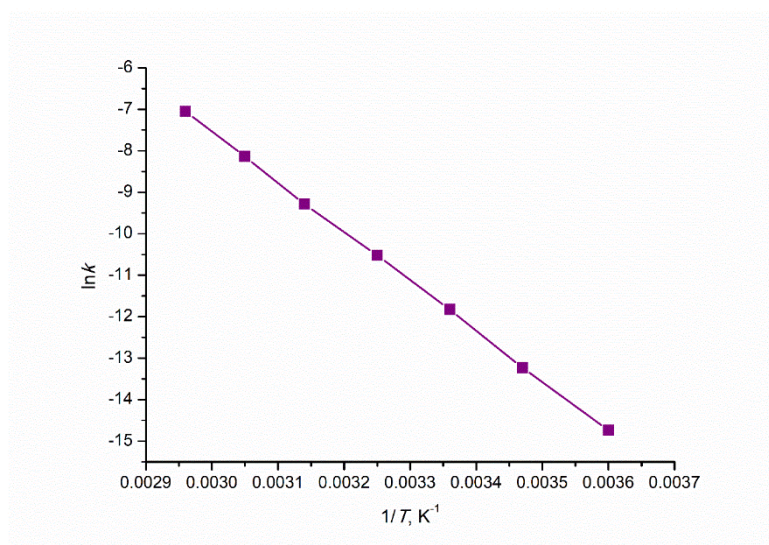

$$k_1 = 2.527 \times 10^{12} \exp(-100\,059 / RT) \text{ (s}^{-1} \text{ mol}^{-1} \text{ dm}^3\text{)}$$

**Figure S11.** Arrhenius plots of rate constants for the crucial reaction step **IM4** + **2a**  $\rightarrow$  **1-TS6-1** +  $PPh_3$  for the formation of product **3a** along the *C2'*-selectivity reaction pathway.



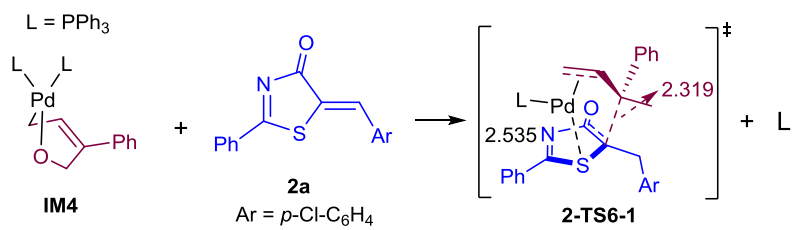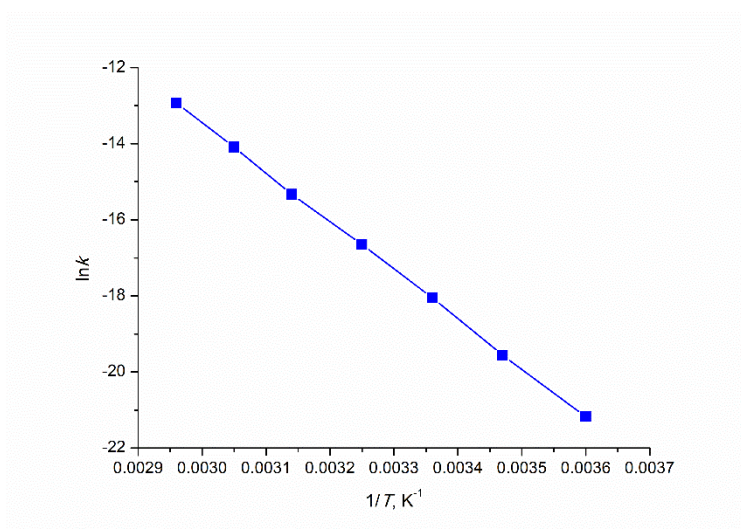

$$k_2 = 9.518 \times 10^{10} \exp(-107\,367 / RT) \quad (\text{s}^{-1} \text{ mol}^{-1} \text{ dm}^3)$$

**Figure S12.** Arrhenius plots of rate constants for the crucial reaction step **IM4** + **2a**  $\rightarrow$  **2-TS6-1** + PPh<sub>3</sub> for the formation of product **4a** along the *C4''*-selectivity reaction pathway.

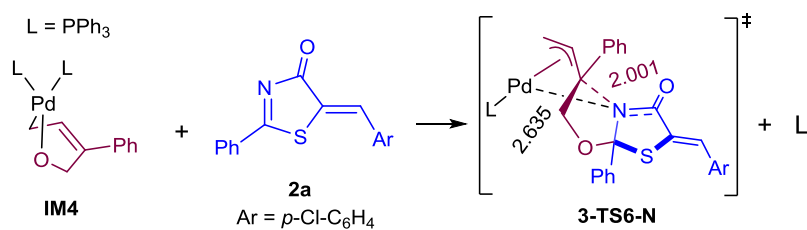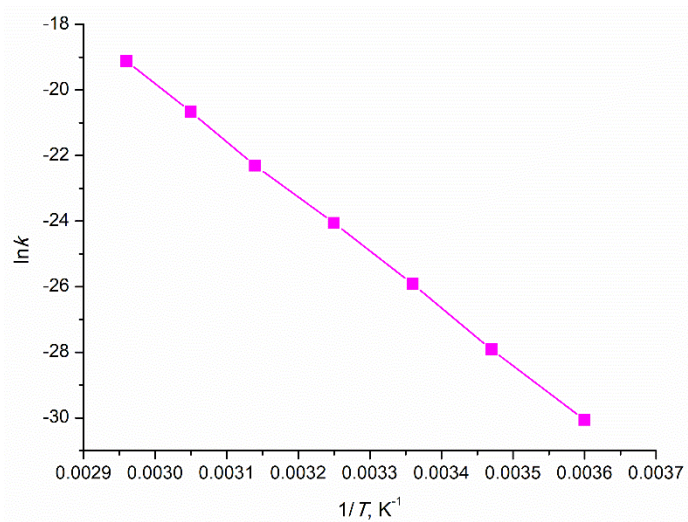

$$k_3 = 5.015 \times 10^{13} \exp(-142\,386 / RT) \text{ (s}^{-1} \text{ mol}^{-1} \text{ dm}^3\text{)}$$

**Figure S13.** Arrhenius plots of rate constants for the crucial reaction step **IM4** + **2a**  $\rightarrow$  **3-TS6-N** + PPh<sub>3</sub> for the formation of product **3a'** along the *C2'*-selectivity reaction pathway.

## 9. Comparison of energies for the formation of products **3a** and **3a'**

**Table S1.** Energy height of the highest point (EHHP, kcal mol<sup>-1</sup>), highest energy barrier (HEB, kcal mol<sup>-1</sup>) and exoergicity (kcal mol<sup>-1</sup>) for the formation of products **3a** and **3a'** between 5-alkenyl Thiazolone **2a** and palladacyclic intermediate **IM4**.

| products   | reaction pathway <sup>a</sup> | EHHP<br>(transition state)      | HEB<br>(reaction step)                    | exoergicity |
|------------|-------------------------------|---------------------------------|-------------------------------------------|-------------|
| <b>3a</b>  | <b>P1a (P1-N + P1-1)</b>      | <b>12.0</b><br><b>(1-TS6-1)</b> | <b>15.6</b><br><b>(1-IM6-N → 1-TS6-1)</b> | 3.8         |
|            | P1a-1 (P1-S + P1-1)           | 12.0<br>(1-TS6-1)               | 15.6<br>(1-IM6-N → 1-TS6-1)               |             |
|            | P1a-2 (P1-O + P1-1)           | 12.0<br>(1-TS6-1)               | 15.6<br>(1-IM6-N → 1-TS6-1)               |             |
|            | <b>P1b (P1-N + P1-2)</b>      | <b>16.1</b><br><b>(1-TS6-2)</b> | <b>19.7</b><br><b>(1-IM6-N → 1-TS6-2)</b> |             |
|            | P1b-1 (P1-O + P1-2)           | 16.1<br>(1-TS6-2)               | 19.7<br>(1-IM6-N → 1-TS6-2)               |             |
|            | P1b-2 (P1-S + P1-2)           | 16.1<br>(1-TS6-2)               | 19.7<br>(1-IM6-N → 1-TS6-2)               |             |
|            | P1c (P1-N + P1-3)             | 17.7<br>(1-TS6-3)               | 21.3<br>(1-IM6-N → 1-TS6-3)               |             |
|            | <b>P1c-1 (P1-O + P1-3)</b>    | <b>17.7</b><br><b>(1-TS6-3)</b> | <b>16.9</b><br><b>(1-IM6-O → 1-TS6-3)</b> |             |
|            | P1c-2 (P1-S + P1-3)           | 17.7<br>(1-TS6-3)               | 21.3<br>(1-IM6-N → 1-TS6-3)               |             |
| <b>3a'</b> | <b>P3a (P1-N + P3-1)</b>      | <b>21.1</b><br><b>(3-TS6-N)</b> | <b>27.6</b><br><b>(3-IM6-N → 3-TS6-N)</b> | 2.7         |
|            | P3a-1 (P3-N + P3-1)           | 21.1<br>(3-TS6-N)               | 27.6<br>(3-IM6-N → 3-TS6-N)               |             |
|            | <b>P3b (P1-N + P3-2)</b>      | 23.2<br><b>(3-TS6-2)</b>        | 29.7<br><b>(3-IM6-N → 3-TS6-2)</b>        |             |
|            | P3b-1 (P3-N + P3-2)           | 23.2<br>(3-TS6-2)               | 29.7<br>(3-IM6-N → 3-TS6-2)               |             |

<sup>a</sup> The (3+2) cyclization reaction pathway is put together from the reaction pathway of C–O bond formation and the reaction pathway of C–N or C–C bond formation.

## 10. Turnover Frequency (TOF) analysis for whole catalytic cycle

**Table S2.** Turnover Frequency (TOF) of the Catalytic Cycle for Cycloaddition Reactions between 5-alkenyl Thiazolone **2a** and Vinylethylene Carbonate **1a** Catalyzed by the Pd(PPh<sub>3</sub>)<sub>4</sub> Catalyst.

| attack sites             | reaction pathways | rate-determining steps                           |                                                  | TOF (s <sup>-1</sup> ) | $k, \text{s}^{-1} \text{mol}^{-1} \text{dm}^3$    | $\Delta G^{\ddagger a}$ (J mol <sup>-1</sup> ) | $\Delta G^{\ddagger a}$ (kcal mol <sup>-1</sup> ) | $\Delta\Delta G^{\ddagger b}$ (kcal mol <sup>-1</sup> ) | products                            |
|--------------------------|-------------------|--------------------------------------------------|--------------------------------------------------|------------------------|---------------------------------------------------|------------------------------------------------|---------------------------------------------------|---------------------------------------------------------|-------------------------------------|
|                          |                   | TDI (G <sub>TDI</sub> , kcal mol <sup>-1</sup> ) | TDS (G <sub>TDS</sub> , kcal mol <sup>-1</sup> ) |                        |                                                   |                                                |                                                   |                                                         |                                     |
| <i>C2'</i> -selectivity  | <b>W-1</b>        | <b>IM4 + 2a</b><br>(-12.5)                       | <b>1-TS6-1 + PPh<sub>3</sub></b><br>(12.0)       | $6.66 \times 10^{-6}$  | $k_1 = 2.527 \times 10^{12} \exp(-100\,059 / RT)$ | $1.0 \times 10^5$                              | 23.9                                              | 1.8                                                     | <b>3a<sup>c</sup></b><br>(obtained) |
| <i>C4''</i> -selectivity | <b>W-2</b>        | <b>IM4 + 2a</b><br>(-12.5)                       | <b>2-TS6-1 + PPh<sub>3</sub></b><br>(15.8)       | $1.09 \times 10^{-8}$  | $k_2 = 9.518 \times 10^{10} \exp(-107\,367 / RT)$ | $1.1 \times 10^5$                              | 25.7                                              |                                                         | <b>4a</b>                           |
| <i>C2'</i> -selectivity  | <b>W-3</b>        | <b>IM4 + 2a</b><br>(-12.5)                       | <b>3-TS6-N + PPh<sub>3</sub></b><br>(21.1)       | $1.15 \times 10^{-12}$ | $k_3 = 5.015 \times 10^{13} \exp(-142\,386 / RT)$ | $1.4 \times 10^5$                              | 34.0                                              | 10.1                                                    | <b>3a'<sup>c</sup></b>              |

<sup>a</sup> $\Delta G^{\ddagger}$  is the activation Gibbs free energy barrier.

<sup>b</sup> $\Delta\Delta G^{\ddagger}$  represents the difference in apparent activation Gibbs free energy barrier (kcal mol<sup>-1</sup>).

<sup>c</sup>Theoretical diastereoselectivity (%) are calculated by Curtin-Hammett principle<sup>4</sup> and the quantitative computational modeling of selectivity reported by Breslow and Friesner<sup>5</sup>.

$$\text{Theoretical diastereoselectivity (\%)} = \frac{\exp(-\Delta\Delta G^{\ddagger} / RT) - 1}{\exp(-\Delta\Delta G^{\ddagger} / RT) + 1}$$

**Notes:** The rate constant ( $k$ ) decrease as  $k_1 > k_2$ ;  $k_1 > k_3$ .

The  $k_1$  for the *C2'*-selectivity is about 3 ~ 2 orders of magnitude larger than the  $k_2$  for the *C4''*-selectivity.

The  $k_1$  for the **3a** is about 8 ~ 4 orders of magnitude larger than the  $k_3$  for the **3a'**.

## 11. Activation strain analysis for the crucial reaction steps

**Table S3.** Activation Strain Analysis of Chemoselectivity-Determining and Diastereoselectivity-Determining Transition States (TSs, kcal mol<sup>-1</sup>) and Typical Lengths of C2'=N or C3''=C4'' (Å) in the Cycloaddition Reactions between substrates Vinyl ethylene Carbonate **1a** and 5-Alkenyl Thiazolone **2a** Catalyzed by the Pd(PPh<sub>3</sub>)<sub>4</sub> Catalyst.<sup>a</sup>

|                      | products   | attack sites | TSs            | Lengths in 2a     | Lengths in TSs | Stretching in TS | Stretching in TS (%) | $\Delta E_{\text{dist}}^{\ddagger}$ [substrate, 2a] | $\Delta E_{\text{dist}}^{\ddagger}$ [palladacyclic species, IM4] | $\Delta E_{\text{dist}}^{\ddagger}$ | $\Delta\Delta E_{\text{dist}}^{\ddagger}$ | $\Delta E_{\text{int}}^{\ddagger}$ | $\Delta\Delta E_{\text{int}}^{\ddagger}$ | $\Delta E^{\ddagger}$ | $\Delta\Delta E^{\ddagger}$ |
|----------------------|------------|--------------|----------------|-------------------|----------------|------------------|----------------------|-----------------------------------------------------|------------------------------------------------------------------|-------------------------------------|-------------------------------------------|------------------------------------|------------------------------------------|-----------------------|-----------------------------|
| chemoselectivity     | <b>4a</b>  | C4''         | <b>2-TS5-O</b> | 1.355 (C3''=C4'') | 1.402          | 0.047            | 3.5                  | 9.4                                                 | 34.4                                                             | 43.8                                | 2.4                                       | -24.1                              | -6.6                                     | 19.7                  | -4.2                        |
|                      | <b>3a</b>  | C2'          | <b>1-TS5-N</b> | 1.295 (C2'=N)     | 1.362          | 0.067            | 5.2                  | 13.8                                                | 32.4                                                             | 46.2                                |                                           | -30.7                              |                                          | 15.5                  |                             |
| diastereoselectivity | <b>3a</b>  | C2'          | <b>1-TS6-1</b> | 1.295 (C2'=N)     | 1.423          | 0.128            | 9.9                  | 53.7                                                | 71.3                                                             | 125.0                               | -1.1                                      | -100.8                             | -8.9                                     | 24.2                  | -10.0                       |
|                      | <b>3a'</b> | C2'          | <b>3-TS6-N</b> | 1.295 (C2'=N)     | 1.413          | 0.118            | 9.1                  | 54.7                                                | 71.4                                                             | 126.1                               |                                           | -91.9                              |                                          | 34.2                  |                             |

<sup>a</sup>Chemo- and diastereoselectivity of palladium-catalyzed cyclization depends on the differences in distortion energies ( $\Delta\Delta E_{\text{dist}}$ ) and interaction energies ( $\Delta\Delta E_{\text{int}}$ ).<sup>6</sup> The difference of chemoselectivity is defined as  $\Delta\Delta E_{\text{dist}} = \Delta E_{\text{dist}}(\text{C2}') - \Delta E_{\text{dist}}(\text{C4}'')$  and  $\Delta\Delta E_{\text{int}} = \Delta E_{\text{int}}(\text{C2}') - \Delta E_{\text{int}}(\text{C4}'')$ . The difference of diastereoselectivity is defined as  $\Delta\Delta E_{\text{dist}} = \Delta E_{\text{dist}}(\mathbf{3a}) - \Delta E_{\text{dist}}(\mathbf{3a}')$  and  $\Delta\Delta E_{\text{int}} = \Delta E_{\text{int}}(\mathbf{3a}) - \Delta E_{\text{int}}(\mathbf{3a}')$ . A larger  $\Delta\Delta E_{\text{dist}}$  signifies a more powerful influence of distortion energy. Conversely, a more negative value of  $\Delta\Delta E_{\text{int}}$  indicates a more powerful influence of interaction energy.

**Notes:** As shown in Table S3, the activation energy  $\Delta E^{\ddagger}$  of the chemoselectivity-determining TSs increases from 15.5 kcal mol<sup>-1</sup> (**3a**) to 19.7 kcal mol<sup>-1</sup> (**4a**). The total distortion energy ( $\Delta E_{\text{dist}}^{\ddagger}$ ) decreases from 46.2 kcal mol<sup>-1</sup> (**3a**) to 43.8 kcal mol<sup>-1</sup> (**4a**). Substrate  $\Delta E_{\text{dist}}^{\ddagger}[\mathbf{2a}]$  decreases from 13.8 kcal mol<sup>-1</sup> (**3a**) to 9.4 kcal mol<sup>-1</sup> (**4a**), whereas the palladacyclic intermediate  $\Delta E_{\text{dist}}^{\ddagger}[\text{IM4}]$  increases from 32.4 kcal mol<sup>-1</sup> (**3a**) to 34.4 kcal mol<sup>-1</sup> (**4a**). It is apparent that the distortion  $\Delta E_{\text{dist}}^{\ddagger}$  makes in the reverse order as the activation energy  $\Delta E^{\ddagger}$ . Furthermore, the distortion  $\Delta E_{\text{dist}}^{\ddagger}[\mathbf{2a}]$  correlates nearly with the distortion  $\Delta E_{\text{dist}}^{\ddagger}$ , which decreases in the same order. On the other hand, the stabilizing TS interaction  $\Delta E_{\text{int}}^{\ddagger}$  increases from -30.7 kcal mol<sup>-1</sup> (**3a**) to -24.1 kcal mol<sup>-1</sup> (**4a**). Overall, the difference in activation energy ( $\Delta\Delta E^{\ddagger} = -$

---

4.2 kcal mol<sup>-1</sup>) in the chemoselectivity-determining TSs originates mainly from the strengthening of the stabilizing TS interaction by -6.6 kcal mol<sup>-1</sup>, whereas the difference in distortion energy ( $\Delta\Delta E_{\text{dist}}^\ddagger$ ) by only 2.4 kcal mol<sup>-1</sup>. Therefore, the stabilizing TS interaction  $\Delta E_{\text{int}}^\ddagger$  correlates almost with the activation energy  $\Delta E^\ddagger$ . As a result, the stabilizing TS interaction energy ( $\Delta E_{\text{int}}^\ddagger$ ) plays a central role in enhancing the chemoselectivity of palladium-catalyzed cyclization, in which  $\Delta E_{\text{int}}^\ddagger$  favors *C2'*-selectivity over *C4''*-selectivity.

As shown in Table S3, for the diastereoselectivity-determining TSs (1-TS6-1 and 3-TS6-N), the formation of 3a has a much larger interaction advantage than that of 3a' by the  $\Delta\Delta E_{\text{int}}^\ddagger$  of -8.9 kcal mol<sup>-1</sup>. Moreover, the disadvantageous  $\Delta\Delta E_{\text{dist}}^\ddagger$  is only -1.1 kcal mol<sup>-1</sup>. Thus, the interaction between palladacyclic species and substrate is the significant factor that accounts for the highly diastereoselective (3+2) cyclization to give the sole product 3a.

## 12. Energies and Gibbs free energies for all species

**Table S4.** Zero-point energies (*ZPE*, hartree), thermal correction to Gibbs free energy ( $G_0$ , hartree), single-point energies (SP-E, hartree), total energies ( $E_c$ , hartree) corrected by the addition of *ZPE* and SP-E, sum of electronic and thermal free energies ( $G_c$ , hartree) with the addition of SP-E as well as *ZPE* and thermal corrections, and relative energies ( $\Delta E$ , kcal mol<sup>-1</sup>) and relative Gibbs free energies ( $\Delta G$ , kcal mol<sup>-1</sup>) of various species with respect to the initial reactants for the formation of possible coordinated complexes **L<sub>n</sub>-Pd-1a** (L = PPh<sub>3</sub>, n = 1-3) in the presence of Pd(PPh<sub>3</sub>)<sub>4</sub> at the M06-L/6-311++G(d,p),SDD\*(PCM-SMD,DCM)//M06-L/6-31G(d),SDD\*(PCM-SMD,DCM) level under experimental temperature and pressure (298.15 K and 1 atm).

| Species                                        | <i>ZPE</i> | $G_0$   | SP-E         | $E_c$ (ZPE + SP-E) | $\Delta E$ | $G_c(G_0 + SP-E)$ | $\Delta G$ |
|------------------------------------------------|------------|---------|--------------|--------------------|------------|-------------------|------------|
| <b>1a</b>                                      | 0.18921    | 0.15135 | -650.95509   | -650.76588         |            | -650.80373        |            |
| Pd(PPh <sub>3</sub> ) <sub>4</sub>             | 1.10192    | 0.99423 | -4273.701901 | -4272.59998        |            | -4272.70767       |            |
| PPh <sub>3</sub>                               | 0.27445    | 0.22913 | -1036.394892 | -1036.12045        |            | -1036.16576       |            |
| <b>1a</b> + Pd(PPh <sub>3</sub> ) <sub>4</sub> | 1.29113    | 1.14558 | -4924.65699  | -4923.36586        | 0.0        | -4923.51141       | 0.0        |
| <b>L<sub>3</sub>-Pd-1a</b>                     | 1.01860    | 0.91811 | -3888.252248 | -3887.23364        |            | -3887.33414       |            |
| <b>L<sub>3</sub>-Pd-1a</b> + PPh <sub>3</sub>  | 1.29305    | 1.14724 | -4924.64714  | -4923.35409        | 7.4        | -4923.49991       | 7.2        |
| <b>L<sub>2</sub>-Pd-1a (IM1)</b>               | 0.74158    | 0.65852 | -2851.840138 | -2851.09856        |            | -2851.18162       |            |
| <b>L<sub>2</sub>-Pd-1a</b> + 2PPh <sub>3</sub> | 1.29047    | 1.11678 | -4924.62992  | -4923.33946        | 16.6       | -4923.51315       | -1.1       |
| <b>L<sub>1</sub>-Pd-1a</b>                     | 0.46517    | 0.40071 | -1815.398564 | -1814.93339        |            | -1814.99786       |            |
| <b>L<sub>1</sub>-Pd-1a</b> + 3PPh <sub>3</sub> | 1.28851    | 1.08809 | -4924.58324  | -4923.29474        | 44.6       | -4923.49515       | 10.2       |

**Table S5.** Zero-point energies (*ZPE*, hartree), thermal correction to Gibbs free energy ( $G_0$ , hartree), single-point energies (SP-E, hartree), total energies ( $E_c$ , hartree) corrected by the addition of *ZPE* and SP-E, sum of electronic and thermal free energies ( $G_c$ , hartree) with the addition of SP-E as well as *ZPE* and thermal corrections, and relative energies ( $\Delta E$ , kcal mol<sup>-1</sup>) and relative Gibbs free energies ( $\Delta G$ , kcal mol<sup>-1</sup>) of various species with respect to the initial reactants for the formation of Pd-containing active species catalyzed by the Pd(PPh<sub>3</sub>)<sub>4</sub> catalyst at the M06-L/6-311++G(d,p),SDD\*(PCM-SMD,DCM)//M06-L/6-31G(d),SDD\*(PCM-SMD,DCM) level under experimental temperature and pressure (298.15 K and 1 atm). IF represents the imaginary frequency of transition state.

| Species                                           | <i>ZPE</i> | $G_0$    | SP-E         | $E_c$<br>( <i>ZPE</i> + SP-E) | $\Delta E$ | $G_c(G_0 + \text{SP-E})$ | $\Delta G$ | IF      |
|---------------------------------------------------|------------|----------|--------------|-------------------------------|------------|--------------------------|------------|---------|
| <b>1a</b>                                         | 0.18921    | 0.15135  | -650.95509   | -650.76588                    |            | -650.80373               |            |         |
| Pd(PPh <sub>3</sub> ) <sub>4</sub>                | 1.10192    | 0.99423  | -4273.701901 | -4272.59998                   |            | -4272.70767              |            |         |
| PPh <sub>3</sub>                                  | 0.27445    | 0.22913  | -1036.394892 | -1036.12045                   |            | -1036.16576              |            |         |
| <b>1a</b> + Pd(PPh <sub>3</sub> ) <sub>4</sub>    | 1.29113    | 1.14558  | -4924.65699  | -4923.36586                   | 0.0        | -4923.51141              | 0.0        |         |
| <b>IM1</b>                                        | 0.74158    | 0.65852  | -2851.840138 | -2851.09856                   |            | -2851.18162              |            |         |
| <b>IM1</b> + 2PPh <sub>3</sub>                    | 1.29047    | 1.11678  | -4924.62992  | -4923.33946                   | 16.6       | -4923.51315              | -1.1       |         |
| <b>TS1</b>                                        | 0.74101    | 0.65807  | -2851.83171  | -2851.09070                   |            | -2851.17364              |            | 88.75i  |
| <b>TS1</b> + 2PPh <sub>3</sub>                    | 1.28990    | 1.11632  | -4924.62150  | -4923.33159                   | 21.5       | -4923.50517              | 3.9        |         |
| <b>IM2</b>                                        | 0.74109    | 0.65886  | -2851.85318  | -2851.11209                   |            | -2851.19433              |            |         |
| <b>IM2</b> + 2PPh <sub>3</sub>                    | 1.28998    | 1.11711  | -4924.64297  | -4923.35299                   | 8.1        | -4923.52586              | -9.1       |         |
| <b>IM3a</b>                                       | 0.74075    | 0.65660  | -2851.85299  | -2851.11225                   |            | -2851.19640              |            |         |
| <b>IM3a</b> + 2PPh <sub>3</sub>                   | 1.28964    | 1.11485  | -4924.64278  | -4923.35314                   | 8.0        | -4923.52793              | -10.4      |         |
| <b>TS2a</b>                                       | 0.73927    | 0.65649  | -2851.84102  | -2851.10176                   |            | -2851.18453              |            | 144.42i |
| <b>TS2a</b> + 2PPh <sub>3</sub>                   | 1.28816    | 1.11475  | -4924.63081  | -4923.34265                   | 14.6       | -4923.51606              | -2.9       |         |
| <b>IM4</b>                                        | 0.72557    | 0.64511  | -2663.20544  | -2662.47987                   |            | -2662.56033              |            |         |
| CO <sub>2</sub>                                   | 0.01186    | -0.00885 | -188.63058   | -188.61872                    |            | -188.63943               |            |         |
| <b>IM4</b> + CO <sub>2</sub> + 2PPh <sub>3</sub>  | 1.28631    | 1.09451  | -4924.62581  | -4923.33949                   | 16.5       | -4923.53129              | -12.5      |         |
| <b>TS2b</b>                                       | 0.73680    | 0.65331  | -2851.82471  | -2851.08790                   |            | -2851.17139              |            |         |
| <b>TS2b</b> + 2PPh <sub>3</sub>                   | 1.28569    | 1.11157  | -4924.61449  | -4923.32880                   | 23.3       | -4923.50292              | 5.3        |         |
| <b>IM4b</b>                                       | 0.72435    | 0.64558  | -2663.20544  | -2662.48109                   |            | -2662.55986              |            |         |
| <b>IM4b</b> + CO <sub>2</sub> + 2PPh <sub>3</sub> | 1.28510    | 1.09498  | -4924.62581  | -4923.34071                   | 15.8       | -4923.53082              | -12.2      |         |



**Table S6.** Zero-point energies (*ZPE*, hartree), thermal correction to Gibbs free energy ( $G_0$ , hartree), single-point energies (SP-E, hartree), total energies ( $E_c$ , hartree) corrected by the addition of *ZPE* and SP-E, sum of electronic and thermal free energies ( $G_c$ , hartree) with the addition of SP-E as well as *ZPE* and thermal corrections, and relative energies ( $\Delta E$ , kcal mol<sup>-1</sup>) and relative Gibbs free energies ( $\Delta G$ , kcal mol<sup>-1</sup>) of various species with respect to the **3a** for the isomers of product **3** at the M06-L/6-311++G(d,p),SDD\*(PCM-SMD,DCM)//M06-L/6-31G(d),SDD\*(PCM-SMD,DCM) level under experimental temperature and pressure (298.15 K and 1 atm).

| Species      | <i>ZPE</i> | $G_0$   | SP-E        | $E_c$ (ZPE + SP-E) | $\Delta E$ | $G_c(G_0 + SP-E)$ | $\Delta G$ |
|--------------|------------|---------|-------------|--------------------|------------|-------------------|------------|
| <b>3a</b>    | 0.39447    | 0.33739 | -2066.55999 | -2066.16553        | 0.0        | -2066.22260       | 0.0        |
| <b>3a-1</b>  | 0.39531    | 0.33943 | -2066.56139 | -2066.16608        | -0.3       | -2066.22197       | 0.4        |
| <b>3a'</b>   | 0.39467    | 0.33791 | -2066.55871 | -2066.16403        | 0.9        | -2066.22080       | 1.1        |
| <b>3a'-1</b> | 0.39476    | 0.33764 | -2066.55301 | -2066.15825        | 4.6        | -2066.21537       | 4.5        |

**Table S7.** Zero-point energies (*ZPE*, hartree), thermal correction to Gibbs free energy ( $G_0$ , hartree), single-point energies (SP-E, hartree), total energies ( $E_c$ , hartree) corrected by the addition of *ZPE* and SP-E, sum of electronic and thermal free energies ( $G_c$ , hartree) with the addition of SP-E as well as *ZPE* and thermal corrections, and relative energies ( $\Delta E$ , kcal mol<sup>-1</sup>) and relative Gibbs free energies ( $\Delta G$ , kcal mol<sup>-1</sup>) of various species with respect to the **4a** for the isomers of product **4** at the M06-L/6-311++G(d,p),SDD\*(PCM-SMD,DCM)//M06-L/6-31G(d),SDD\*(PCM-SMD,DCM) level under experimental temperature and pressure (298.15 K and 1 atm).

| Species        | <i>ZPE</i> | $G_0$   | SP-E        | $E_c$ (ZPE + SP-E) | $\Delta E$ | $G_c(G_0 + SP-E)$ | $\Delta G$ |
|----------------|------------|---------|-------------|--------------------|------------|-------------------|------------|
| <b>4a</b>      | 0.39479    | 0.33763 | -2066.56744 | -2066.17265        | -4.0       | -2066.22981       | 0.0        |
| <b>4a-1</b>    | 0.39454    | 0.33694 | -2066.56655 | -2066.17201        | -3.6       | -2066.22961       | 0.1        |
| <b>4a'</b>     | 0.39488    | 0.33792 | -2066.56109 | -2066.16621        | 0.0        | -2066.22317       | 4.2        |
| <b>4a'-1</b>   | 0.39578    | 0.33903 | -2066.55235 | -2066.15657        | 6.0        | -2066.21331       | 10.4       |
| <b>4a''</b>    | 0.39484    | 0.33789 | -2066.56783 | -2066.17299        | -4.3       | -2066.22970       | 0.1        |
| <b>4a''-1</b>  | 0.39576    | 0.33939 | -2066.56858 | -2066.17282        | -4.1       | -2066.22920       | 0.4        |
| <b>4a'''</b>   | 0.39541    | 0.33921 | -2066.55998 | -2066.16458        | 1.0        | -2066.22077       | 5.7        |
| <b>4a'''-1</b> | 0.39518    | 0.33809 | -2066.56138 | -2066.16621        | 0.0        | -2066.22330       | 4.1        |

**Table S8.** Zero-point energies (*ZPE*, hartree), thermal correction to Gibbs free energy ( $G_0$ , hartree), single-point energies (SP-E, hartree), total energies ( $E_c$ , hartree) corrected by the addition of *ZPE* and SP-E, sum of electronic and thermal free energies ( $G_c$ , hartree) with the addition of SP-E as well as *ZPE* and thermal corrections, and relative energies ( $\Delta E$ , kcal mol<sup>-1</sup>) and relative Gibbs free energies ( $\Delta G$ , kcal mol<sup>-1</sup>) of various species with respect to the initial reactants for the C2'-O5 formation between palladacyclic intermediate and 5-alkenyl thiazolone **2a** along *C2'-selectivity* reaction pathways at the M06-L/6-311++G(d,p),SDD\*(PCM-SMD,DCM)//M06-L/6-31G(d),SDD\*(PCM-SMD,DCM) level under experimental temperature and pressure (298.15 K and 1 atm).

| Species                                                    | <i>ZPE</i> | $G_0$    | SP-E        | $E_c$<br>( <i>ZPE</i> + SP-E) | $\Delta E$ | $G_c(G_0 + \text{SP-E})$ | $\Delta G$ | IF              |
|------------------------------------------------------------|------------|----------|-------------|-------------------------------|------------|--------------------------|------------|-----------------|
| <b>1a</b>                                                  | 0.18921    | 0.15135  | -650.95509  | -650.76588                    |            | -650.80373               |            |                 |
| <b>2a</b>                                                  | 0.21766    | 0.17086  | -1604.22306 | -1604.00540                   |            | -1604.05220              |            |                 |
| Pd(PPh <sub>3</sub> ) <sub>4</sub>                         | 1.10192    | 0.99423  | -4273.70190 | -4272.59998                   |            | -4272.70767              |            |                 |
| PPh <sub>3</sub>                                           | 0.27445    | 0.22913  | -1036.39489 | -1036.12045                   |            | -1036.16576              |            |                 |
| CO <sub>2</sub>                                            | 0.01186    | -0.00885 | -188.63058  | -188.61872                    |            | -188.63943               |            |                 |
| <b>1a</b> + <b>2a</b> + Pd(PPh <sub>3</sub> ) <sub>4</sub> | 1.50879    | 1.31644  | -6528.88005 | -6527.37126                   | 0.0        | -6527.56361              | 0.0        |                 |
| <b>1-IM5-O</b>                                             | 0.66854    | 0.58542  | -3231.01215 | -3230.34361                   |            | -3230.42673              |            |                 |
| <b>1-IM5-O</b> + 3PPh <sub>3</sub> + CO <sub>2</sub>       | 1.50373    | 1.26395  | -6528.82740 | -6527.32367                   | 29.9       | -6527.56346              | 0.1        |                 |
| <b>1-TS5-O</b>                                             | 0.66704    | 0.58601  | -3230.98972 | -3230.32268                   |            | -3230.40371              |            | 90.43 <i>i</i>  |
| <b>1-TS5-O</b> + 3PPh <sub>3</sub> + CO <sub>2</sub>       | 1.50223    | 1.26454  | -6528.80497 | -6527.30274                   | 43.0       | -6527.54043              | 14.5       |                 |
| <b>1-IM6-O</b>                                             | 0.66942    | 0.58912  | -3231.01469 | -3230.34527                   |            | -3230.42557              |            |                 |
| <b>1-IM6-O</b> + 3PPh <sub>3</sub> + CO <sub>2</sub>       | 1.50461    | 1.26765  | -6528.82995 | -6527.32533                   | 28.8       | -6527.56230              | 0.8        |                 |
| <b>1-IM5-N</b>                                             | 0.66880    | 0.58684  | -3231.02155 | -3230.35275                   |            | -3230.43471              |            |                 |
| <b>1-IM5-N</b> + 3PPh <sub>3</sub> + CO <sub>2</sub>       | 1.50399    | 1.26537  | -6528.83681 | -6527.33282                   | 24.1       | -6527.57144              | -4.9       |                 |
| <b>1-TS5-N</b>                                             | 0.66795    | 0.58592  | -3231.00801 | -3230.34006                   |            | -3230.42210              |            | 281.47 <i>i</i> |
| <b>1-TS5-N</b> + 3PPh <sub>3</sub> + CO <sub>2</sub>       | 1.50315    | 1.26445  | -6528.82327 | -6527.32012                   | 32.1       | -6527.55882              | 3.0        |                 |
| <b>1-IM6-N</b>                                             | 0.67024    | 0.59135  | -3231.02393 | -3230.35369                   |            | -3230.43259              |            |                 |
| <b>1-IM6-N</b> + 3PPh <sub>3</sub> + CO <sub>2</sub>       | 1.50543    | 1.26988  | -6528.83919 | -6527.33376                   | 23.5       | -6527.56931              | -3.6       |                 |
| <b>1-IM5-S</b>                                             | 0.67078    | 0.59075  | -3231.01496 | -3230.34419                   |            | -3230.42421              |            |                 |
| <b>1-IM5-S</b> + 3PPh <sub>3</sub> + CO <sub>2</sub>       | 1.50597    | 1.26929  | -6528.83022 | -6527.32425                   | 29.5       | -6527.56094              | 1.7        |                 |
| <b>1-TS5-S</b>                                             | 0.66947    | 0.59142  | -3231.00844 | -3230.33897                   |            | -3230.41703              |            | 260.14 <i>i</i> |
| <b>1-TS5-S</b> + 3PPh <sub>3</sub> + CO <sub>2</sub>       | 1.50466    | 1.26995  | -6528.82370 | -6527.31903                   | 32.8       | -6527.55375              | 6.2        |                 |
| <b>1-IM6-S</b>                                             | 0.66944    | 0.58929  | -3231.01084 | -3230.34140                   |            | -3230.42155              |            |                 |
| <b>1-IM6-S</b> + 3PPh <sub>3</sub> + CO <sub>2</sub>       | 1.50463    | 1.26782  | -6528.82610 | -6527.32147                   | 31.2       | -6527.55828              | 3.3        |                 |

**Table S9.** Zero-point energies (*ZPE*, hartree), thermal correction to Gibbs free energy ( $G_0$ , hartree), single-point energies (SP-E, hartree), total energies ( $E_c$ , hartree) corrected by the addition of *ZPE* and SP-E, sum of electronic and thermal free energies ( $G_c$ , hartree) with the addition of SP-E as well as *ZPE* and thermal corrections, and relative energies ( $\Delta E$ , kcal mol<sup>-1</sup>) and relative Gibbs free energies ( $\Delta G$ , kcal mol<sup>-1</sup>) of various species with respect to the initial reactants for the C3–N bond formation to form products **3a** between palladacyclic intermediate and 5-alkenyl thiazolone **2a** along *C2'*-selectivity reaction pathways at the M06-L/6-311++G(d,p),SDD\*(PCM-SMD,DCM)//M06-L/6-31G(d),SDD\*(PCM-SMD,DCM) level under experimental temperature and pressure (298.15 K and 1 atm).

| Species                                                          | <i>ZPE</i> | $G_0$    | SP-E        | $E_c$<br>( <i>ZPE</i> + SP-E) | $\Delta E$ | $G_c(G_0 + \text{SP-E})$ | $\Delta G$ | IF              |
|------------------------------------------------------------------|------------|----------|-------------|-------------------------------|------------|--------------------------|------------|-----------------|
| <b>1a</b>                                                        | 0.18921    | 0.15135  | -650.95509  | -650.76588                    |            | -650.80373               |            |                 |
| <b>2a</b>                                                        | 0.21766    | 0.17086  | -1604.22306 | -1604.00540                   |            | -1604.05220              |            |                 |
| Pd(PPh <sub>3</sub> ) <sub>4</sub>                               | 1.10192    | 0.99423  | -4273.70190 | -4272.59998                   |            | -4272.70767              |            |                 |
| PPh <sub>3</sub>                                                 | 0.27445    | 0.22913  | -1036.39489 | -1036.12045                   |            | -1036.16576              |            |                 |
| CO <sub>2</sub>                                                  | 0.01186    | -0.00885 | -188.63058  | -188.61872                    |            | -188.63943               |            |                 |
| <b>1a</b> + <b>2a</b> + Pd(PPh <sub>3</sub> ) <sub>4</sub>       | 1.50879    | 1.31644  | -6528.88005 | -6527.37126                   | 0.0        | -6527.56361              | 0.0        |                 |
| <b>1-IM7-1</b>                                                   | 0.67157    | 0.59283  | -3231.02449 | -3230.35292                   |            | -3230.43166              |            |                 |
| <b>1-IM7-1</b> + 3PPh <sub>3</sub> + CO <sub>2</sub>             | 1.50676    | 1.27136  | -6528.83975 | -6527.33298                   | 24.0       | -6527.56839              | -3.0       |                 |
| <b>1-IM7-1a</b>                                                  | 0.66978    | 0.58688  | -3231.01249 | -3230.34271                   |            | -3230.42561              |            |                 |
| <b>1-IM7-1a</b> + 3PPh <sub>3</sub> + CO <sub>2</sub>            | 1.50497    | 1.26541  | -6528.82775 | -6527.32278                   | 30.4       | -6527.56234              | 0.8        |                 |
| <b>1-TS6-1</b>                                                   | 0.66925    | 0.58778  | -3230.99559 | -3230.32634                   |            | -3230.40781              |            | 300.36 <i>i</i> |
| <b>1-TS6-1</b> + 3PPh <sub>3</sub> + CO <sub>2</sub>             | 1.50445    | 1.26632  | -6528.81085 | -6527.30640                   | 40.7       | -6527.54453              | 12.0       |                 |
| <b>1-IM8-1</b>                                                   | 0.67142    | 0.59012  | -3231.00941 | -3230.33799                   |            | -3230.41929              |            |                 |
| <b>1-IM8-1</b> + 3PPh <sub>3</sub> + CO <sub>2</sub>             | 1.50661    | 1.26865  | -6528.82467 | -6527.31806                   | 33.4       | -6527.55601              | 4.8        |                 |
| <b>1-IM7-2</b>                                                   | 0.66919    | 0.58416  | -3230.99170 | -3230.32251                   |            | -3230.40755              |            |                 |
| <b>1-IM7-2</b> + 3PPh <sub>3</sub> + CO <sub>2</sub>             | 1.50438    | 1.26269  | -6528.80696 | -6527.30258                   | 43.1       | -6527.54427              | 12.1       |                 |
| <b>1-TS6-2</b>                                                   | 0.66777    | 0.58122  | -3230.98248 | -3230.31471                   |            | -3230.40125              |            | 269.22 <i>i</i> |
| <b>1-TS6-2</b> + 3PPh <sub>3</sub> + CO <sub>2</sub>             | 1.50296    | 1.25975  | -6528.79773 | -6527.29477                   | 48.0       | -6527.53798              | 16.1       |                 |
| <b>1-IM8-2</b>                                                   | 0.67055    | 0.58644  | -3230.99996 | -3230.32941                   |            | -3230.41352              |            |                 |
| <b>1-IM8-2</b> + 3PPh <sub>3</sub>                               | 1.50574    | 1.26497  | -6528.81522 | -6527.30947                   | 38.8       | -6527.55025              | 8.4        |                 |
| <b>3a</b>                                                        | 0.39447    | 0.33739  | -2066.55999 | -2066.16553                   |            | -2066.22260              |            |                 |
| <b>3a</b> + CO <sub>2</sub> + Pd(PPh <sub>3</sub> ) <sub>4</sub> | 1.50824    | 1.32277  | -6528.89248 | -6527.38423                   | -8.1       | -6527.56971              | -3.8       |                 |

Continued Table S9

| Species                                                               | ZPE     | $G_0$   | SP-E        | $E_c$<br>(ZPE + SP-E) | $\Delta E$ | $G_c(G_0 + SP-E)$ | $\Delta G$ | IF |
|-----------------------------------------------------------------------|---------|---------|-------------|-----------------------|------------|-------------------|------------|----|
| <b>1-TS6-3</b>                                                        | 0.66915 | 0.58898 | -3230.98770 | -3230.31855           |            | -3230.39872       |            |    |
| <b>1-TS6-3</b> +<br>3PPh <sub>3</sub> + CO <sub>2</sub>               | 1.50434 | 1.26751 | -6528.80295 | -6527.29861           | 45.6       | -6527.53545       | 17.7       |    |
| <b>1-IM8-3</b>                                                        | 0.67146 | 0.59049 | -3231.00809 | -3230.33663           |            | -3230.41760       |            |    |
| <b>1-IM8-3</b> +<br>3PPh <sub>3</sub> + CO <sub>2</sub>               | 1.50665 | 1.26902 | -6528.82335 | -6527.31669           | 34.2       | -6527.55433       | 5.8        |    |
| <b>3a-1</b>                                                           | 0.39531 | 0.33943 | -2066.56139 | -2066.16608           |            | -2066.22197       |            |    |
| <b>3a-1</b> + CO <sub>2</sub><br>+ Pd(PPh <sub>3</sub> ) <sub>4</sub> | 1.50909 | 1.32480 | -6528.89387 | -6527.38478           | -8.5       | -6527.56907       | -3.4       |    |
| <b>3a</b>                                                             | 0.39447 | 0.33739 | -2066.55999 | -2066.16553           |            | -2066.22260       |            |    |
| <b>3a</b> + CO <sub>2</sub> +<br>Pd(PPh <sub>3</sub> ) <sub>4</sub>   | 1.50824 | 1.32277 | -6528.89248 | -6527.38423           | -8.1       | -6527.56971       | -3.8       |    |

**Table S10.** Zero-point energies (*ZPE*, hartree), thermal correction to Gibbs free energy ( $G_0$ , hartree), single-point energies (SP-E, hartree), total energies ( $E_c$ , hartree) corrected by the addition of *ZPE* and SP-E, sum of electronic and thermal free energies ( $G_c$ , hartree) with the addition of SP-E as well as *ZPE* and thermal corrections, and relative energies ( $\Delta E$ , kcal mol<sup>-1</sup>) and relative Gibbs free energies ( $\Delta G$ , kcal mol<sup>-1</sup>) of various species with respect to the initial reactants for the formation of product **3a'** between palladacyclic intermediate and 5-alkenyl thiazolone **2a** along *C2'*-selectivity reaction pathways at the M06-L/6-311++G(d,p),SDD\*(PCM-SMD,DCM)//M06-L/6-31G(d),SDD\*(PCM-SMD,DCM) level under experimental temperature and pressure (298.15 K and 1 atm).

| Species                                                           | <i>ZPE</i> | $G_0$    | SP-E        | $E_c$<br>( <i>ZPE</i> + SP-E) | $\Delta E$ | $G_c(G_0 + \text{SP-E})$ | $\Delta G$ | IF              |
|-------------------------------------------------------------------|------------|----------|-------------|-------------------------------|------------|--------------------------|------------|-----------------|
| <b>1a</b>                                                         | 0.18921    | 0.15135  | -650.95509  | -650.76588                    |            | -650.80373               |            |                 |
| <b>2a</b>                                                         | 0.21766    | 0.17086  | -1604.22306 | -1604.00540                   |            | -1604.05220              |            |                 |
| Pd(PPh <sub>3</sub> ) <sub>4</sub>                                | 1.10192    | 0.99423  | -4273.70190 | -4272.59998                   |            | -4272.70767              |            |                 |
| PPh <sub>3</sub>                                                  | 0.27445    | 0.22913  | -1036.39489 | -1036.12045                   |            | -1036.16576              |            |                 |
| CO <sub>2</sub>                                                   | 0.01186    | -0.00885 | -188.63058  | -188.61872                    |            | -188.63943               |            |                 |
| <b>1a</b> + <b>2a</b> + Pd(PPh <sub>3</sub> ) <sub>4</sub>        | 1.50879    | 1.31644  | -6528.88005 | -6527.37126                   | 0.0        | -6527.56361              | 0.0        |                 |
| <b>3-IM5-N</b>                                                    | 0.66783    | 0.58400  | -3231.01637 | -3230.34854                   |            | -3230.43237              |            |                 |
| <b>3-IM5-N</b> + 3PPh <sub>3</sub> + CO <sub>2</sub>              | 1.50302    | 1.26254  | -6528.83163 | -6527.32860                   | 26.8       | -6527.56909              | -3.4       |                 |
| <b>3-TS5-N</b>                                                    | 0.66872    | 0.58774  | -3231.00453 | -3230.33581                   |            | -3230.41679              |            | 269.51 <i>i</i> |
| <b>3-TS5-N</b> + 3PPh <sub>3</sub> + CO <sub>2</sub>              | 1.50391    | 1.26627  | -6528.81978 | -6527.31587                   | 34.8       | -6527.55351              | 6.3        |                 |
| <b>3-IM6-N</b>                                                    | 0.67044    | 0.58941  | -3231.02659 | -3230.35615                   |            | -3230.43719              |            |                 |
| <b>3-IM6-N</b> + 3PPh <sub>3</sub> + CO <sub>2</sub>              | 1.50563    | 1.26794  | -6528.84185 | -6527.33622                   | 22.0       | -6527.57391              | -6.5       |                 |
| <b>3-TS6-N</b>                                                    | 0.66783    | 0.58499  | -3230.97819 | -3230.31036                   |            | -3230.39319              |            | 335.27 <i>i</i> |
| <b>3-TS6-N</b> + 3PPh <sub>3</sub> + CO <sub>2</sub>              | 1.50302    | 1.26353  | -6528.79345 | -6527.29042                   | 50.7       | -6527.52992              | 21.1       |                 |
| <b>3-IM8-N</b>                                                    | 0.67024    | 0.59014  | -3230.98488 | -3230.31464                   |            | -3230.39474              |            |                 |
| <b>3-IM8-N</b> + 3PPh <sub>3</sub> + CO <sub>2</sub>              | 1.50543    | 1.26867  | -6528.80014 | -6527.29470                   | 48.0       | -6527.53146              | 20.2       |                 |
| <b>3-IM7-2</b>                                                    | 0.66998    | 0.58692  | -3230.98501 | -3230.31504                   |            | -3230.39810              |            |                 |
| <b>3-IM7-2</b> + 3PPh <sub>3</sub> + CO <sub>2</sub>              | 1.50517    | 1.26545  | -6528.80027 | -6527.29510                   | 47.8       | -6527.53482              | 18.1       |                 |
| <b>3-TS6-2</b>                                                    | 0.66888    | 0.58629  | -3230.97622 | -3230.30734                   |            | -3230.38993              |            | 225.11 <i>i</i> |
| <b>3-TS6-2</b> + 3PPh <sub>3</sub> + CO <sub>2</sub>              | 1.50407    | 1.26483  | -6528.79148 | -6527.28741                   | 52.6       | -6527.52666              | 23.2       |                 |
| <b>3-IM8-2</b>                                                    | 0.67026    | 0.58586  | -3230.99554 | -3230.32528                   |            | -3230.40968              |            |                 |
| <b>3-IM8-2</b> + 3PPh <sub>3</sub> + CO <sub>2</sub>              | 1.50545    | 1.26439  | -6528.81080 | -6527.30535                   | 41.4       | -6527.54641              | 10.8       |                 |
| <b>3a'</b>                                                        | 0.39467    | 0.33791  | -2066.55871 | -2066.16403                   |            | -2066.22080              |            |                 |
| <b>3a'</b> + CO <sub>2</sub> + Pd(PPh <sub>3</sub> ) <sub>4</sub> | 1.50845    | 1.32328  | -6528.89119 | -6527.38274                   | -7.2       | -6527.56791              | -2.7       |                 |

**Table S11.** Zero-point energies (*ZPE*, hartree), thermal correction to Gibbs free energy ( $G_0$ , hartree), single-point energies (*SP-E*, hartree), total energies ( $E_c$ , hartree) corrected by the addition of *ZPE* and *SP-E*, sum of electronic and thermal free energies ( $G_c$ , hartree) with the addition of *SP-E* as well as *ZPE* and thermal corrections, and relative energies ( $\Delta E$ , kcal mol<sup>-1</sup>) and relative Gibbs free energies ( $\Delta G$ , kcal mol<sup>-1</sup>) of various species with respect to the initial reactants for the C4''–O5 and C3–C3'' bonds formation to form product **4a** between palladacyclic intermediate and 5-alkenyl thiazolone **2a** along *C4''-selectivity* reaction pathways at the M06-L/6-311++G(d,p),SDD\*(PCM-SMD,DCM)//M06-L/6-31G(d),SDD\*(PCM-SMD,DCM) level under experimental temperature and pressure (298.15 K and 1 atm).

| Species                                                    | <i>ZPE</i> | $G_0$    | <i>SP-E</i> | $E_c$<br>( <i>ZPE</i> + <i>SP-E</i> ) | $\Delta E$ | $G_c(G_0 + \text{SP-E})$ | $\Delta G$ | IF              |
|------------------------------------------------------------|------------|----------|-------------|---------------------------------------|------------|--------------------------|------------|-----------------|
| <b>1a</b>                                                  | 0.18921    | 0.15135  | -650.95509  | -650.76588                            |            | -650.80373               |            |                 |
| <b>2a</b>                                                  | 0.21766    | 0.17086  | -1604.22306 | -1604.00540                           |            | -1604.05220              |            |                 |
| Pd(PPh <sub>3</sub> ) <sub>4</sub>                         | 1.10192    | 0.99423  | -4273.70190 | -4272.59998                           |            | -4272.70767              |            |                 |
| PPh <sub>3</sub>                                           | 0.27445    | 0.22913  | -1036.39489 | -1036.12045                           |            | -1036.16576              |            |                 |
| CO <sub>2</sub>                                            | 0.01186    | -0.00885 | -188.63058  | -188.61872                            |            | -188.63943               |            |                 |
| <b>1a</b> + <b>2a</b> + Pd(PPh <sub>3</sub> ) <sub>4</sub> | 1.50879    | 1.31644  | -6528.88005 | -6527.37126                           | 0.0        | -6527.56361              | 0.0        |                 |
| <b>2-IM5-O</b>                                             | 0.66790    | 0.58334  | -3231.00615 | -3230.33826                           |            | -3230.42281              |            |                 |
| <b>2-IM5-O</b> + 3PPh <sub>3</sub> + CO <sub>2</sub>       | 1.50309    | 1.26187  | -6528.82141 | -6527.31832                           | 33.2       | -6527.55954              | 2.6        |                 |
| <b>2-TS5-O</b>                                             | 0.66845    | 0.58556  | -3231.00182 | -3230.33337                           |            | -3230.41625              |            | 164.69 <i>i</i> |
| <b>2-TS5-O</b> + 3PPh <sub>3</sub> + CO <sub>2</sub>       | 1.50364    | 1.26410  | -6528.81707 | -6527.31344                           | 36.3       | -6527.55298              | 6.7        |                 |
| <b>2-IM6-O</b>                                             | 0.67085    | 0.58884  | -3231.02388 | -3230.35303                           |            | -3230.43504              |            |                 |
| <b>2-IM6-O</b> + 3PPh <sub>3</sub> + CO <sub>2</sub>       | 1.50604    | 1.26737  | -6528.83914 | -6527.33309                           | 23.9       | -6527.57177              | -5.1       |                 |
| <b>2-IM7-1</b>                                             | 0.67056    | 0.59252  | -3231.01714 | -3230.34658                           |            | -3230.42462              |            |                 |
| <b>2-IM7-1</b> + 3PPh <sub>3</sub> + CO <sub>2</sub>       | 1.50575    | 1.27105  | -6528.83239 | -6527.32664                           | 28.0       | -6527.56134              | 1.4        |                 |
| <b>2-TS6-1</b>                                             | 0.67041    | 0.59192  | -3230.99366 | -3230.32325                           |            | -3230.40174              |            | 262.48 <i>i</i> |
| <b>2-TS6-1</b> + 3PPh <sub>3</sub> + CO <sub>2</sub>       | 1.50560    | 1.27046  | -6528.80892 | -6527.30331                           | 42.6       | -6527.53846              | 15.8       |                 |
| <b>2-IM8-1</b>                                             | 0.67251    | 0.59374  | -3231.01940 | -3230.34689                           |            | -3230.42566              |            |                 |
| <b>2-IM8-1</b> + 3PPh <sub>3</sub> + CO <sub>2</sub>       | 1.50770    | 1.27227  | -6528.83466 | -6527.32696                           | 27.8       | -6527.56238              | 0.8        |                 |
| <b>2-IM7-2</b>                                             | 0.66940    | 0.58429  | -3230.98604 | -3230.31664                           |            | -3230.40176              |            |                 |
| <b>2-IM7-2</b> + 3PPh <sub>3</sub> + CO <sub>2</sub>       | 1.50460    | 1.26282  | -6528.80130 | -6527.29670                           | 46.8       | -6527.53848              | 15.8       |                 |
| <b>2-TS6-2</b>                                             | 0.66996    | 0.58687  | -3230.98204 | -3230.31208                           |            | -3230.39518              |            | 180.92 <i>i</i> |
| <b>2-TS6-2</b> + 3PPh <sub>3</sub> + CO <sub>2</sub>       | 1.50515    | 1.26540  | -6528.79730 | -6527.29215                           | 49.6       | -6527.53190              | 19.9       |                 |

Continued Table S11

| Species                                                             | ZPE     | $G_0$   | SP-E        | $E_c$<br>(ZPE + SP-E) | $\Delta E$ | $G_c(G_0 + SP-E)$ | $\Delta G$ | IF              |
|---------------------------------------------------------------------|---------|---------|-------------|-----------------------|------------|-------------------|------------|-----------------|
| <b>2-IM8-2</b>                                                      | 0.67168 | 0.58908 | -3231.00865 | -3230.33697           |            | -3230.41957       |            |                 |
| <b>2-IM8-2</b> +<br>3PPh <sub>3</sub> + CO <sub>2</sub>             | 1.50687 | 1.26761 | -6528.82391 | -6527.31704           | 34.0       | -6527.55630       | 4.6        |                 |
| <b>2-IM7-3</b>                                                      | 0.67016 | 0.58888 | -3230.99347 | -3230.32331           |            | -3230.40460       |            |                 |
| <b>2-IM7-3</b> +<br>3PPh <sub>3</sub> + CO <sub>2</sub>             | 1.50536 | 1.26741 | -6528.80873 | -6527.30337           | 42.6       | -6527.54132       | 14.0       |                 |
| <b>2-TS6-3</b>                                                      | 0.66948 | 0.58902 | -3230.97627 | -3230.30679           |            | -3230.38725       |            | 290.51 <i>i</i> |
| <b>2-TS6-3</b> +<br>3PPh <sub>3</sub> + CO <sub>2</sub>             | 1.50467 | 1.26755 | -6528.79153 | -6527.28686           | 53.0       | -6527.52398       | 24.9       |                 |
| <b>2-IM8-3</b>                                                      | 0.67049 | 0.58592 | -3230.99314 | -3230.32266           |            | -3230.40723       |            |                 |
| <b>2-IM8-3</b> +<br>3PPh <sub>3</sub> + CO <sub>2</sub>             | 1.50568 | 1.26445 | -6528.80840 | -6527.30272           | 43.0       | -6527.54395       | 12.3       |                 |
| <b>2-IM5-S</b>                                                      | 0.66843 | 0.58702 | -3231.01890 | -3230.35047           |            | -3230.43188       |            |                 |
| <b>2-IM5-S</b> +<br>3PPh <sub>3</sub> + CO <sub>2</sub>             | 1.50363 | 1.26555 | -6528.83416 | -6527.33054           | 25.6       | -6527.56861       | -3.1       |                 |
| <b>2-TS5-S</b>                                                      | 0.66923 | 0.59159 | -3231.00028 | -3230.33105           |            | -3230.40869       |            | 300.48 <i>i</i> |
| <b>2-TS5-S</b> +<br>3PPh <sub>3</sub> + CO <sub>2</sub>             | 1.50442 | 1.27012 | -6528.81554 | -6527.31112           | 37.7       | -6527.54542       | 11.4       |                 |
| <b>4a</b>                                                           | 0.39479 | 0.33763 | -2066.56744 | -2066.17265           |            | -2066.22981       |            |                 |
| <b>4a</b> + CO <sub>2</sub> +<br>Pd(PPh <sub>3</sub> ) <sub>4</sub> | 1.50857 | 1.32301 | -6528.89992 | -6527.39136           | -12.6      | -6527.57692       | -8.4       |                 |

---

## 13. A supplement for the Computational details section

### 13.1 Activity index analysis

Based on the highest occupied molecular orbital (HOMO) energy obtained within the Kohn-Sham scheme<sup>7</sup>, the electrophilicity index  $\omega$  and nucleophilicity  $N$  index are defined as<sup>8</sup>:

$$\omega = \frac{\mu^2}{2\eta} \quad (\text{eV}) \quad (\text{S1})$$

$$N = E_{\text{HOMO(Nu)}} (\text{eV}) - E_{\text{HOMO(TCE)}} (\text{eV}) \quad (\text{S2})$$

where the electronic chemical potential  $\mu$  and the chemical hardness  $\eta$  are defined as  $\mu = (\epsilon_{\text{HOMO}} + \epsilon_{\text{LUMO}})/2$  and  $\eta = (\epsilon_{\text{LUMO}} - \epsilon_{\text{HOMO}})$ , respectively. The tetracyanoethylene (TCE) acts as reference.

The corresponding local electrophilicity  $\omega_{\kappa}$  and local nucleophilicity  $N_{\kappa}$  indices are defined as:

$$\omega_{\kappa} = \omega P_{\kappa}^{+} \quad (\text{S3})$$

$$N_{\kappa} = N P_{\kappa}^{-} \quad (\text{S4})$$

where the atom  $\kappa$  electrophilic Parr function  $P_{\kappa}^{+}$  and nucleophilic Parr function  $P_{\kappa}^{-}$  were obtained through the Mülliken atomic spin density (ASD) analysis at the radical anion and radical cation of the corresponding reactants, respectively<sup>9</sup>.



### 13.2 Turnover frequency (TOF) analysis and Rate constants $k(T)$

The turnover frequency (TOF) of the catalytic cycle determines the efficiency of the catalyst. Based on the transition state theory,<sup>10</sup> TOF can be calculated by Eqs. (S5) and (S6),<sup>11</sup> in which  $\delta E$  (the energy span<sup>12</sup>) is defined as the energy difference between the summit and trough of the catalytic cycle.  $G_{\text{TDS}}$  and  $G_{\text{TDI}}$  are the Gibbs free energies of the TOF determining transition state (TDS) and the TOF determining intermediate (TDI), and  $\Delta G_r$  is the global free energy of the whole cycle.

$$\text{TOF} = \frac{k_B T}{h} e^{-\frac{\delta E}{RT}} \quad (\text{S5})$$

$$\delta E = \begin{cases} G_{\text{TDS}} - G_{\text{TDI}} & \text{if TDS appears after TDI} \\ G_{\text{TDS}} - G_{\text{TDI}} + \Delta G_r & \text{if TDS appears before TDI} \end{cases} \quad (\text{S6})$$

where  $k_B$  is the Boltzmann constant,  $T$  is the absolute temperature, and  $h$  is the Planck constant.  $G_{\text{TDS}}$  and  $G_{\text{TDI}}$  are the Gibbs free energies of the TOF determining transition state (TDS) and the TOF determining intermediate (TDI), and  $\Delta G_r$  is the global free energy of the whole cycle.

The rate constants  $k(T)$  have been evaluated over the 278 ~ 338 K temperature range, according to conventional transition state theory (TST)  $k'(T)$ , including tunneling correction  $\kappa(T)$ , based on Winger's formulation as follows<sup>10a</sup>:

$$k'(T) = \frac{k_B T}{hc^0} e^{-\frac{\Delta G^\ddagger}{RT}} \quad (\text{S7})$$

$$\kappa(T) = 1 + \frac{1}{24} \left| h\omega^\ddagger \beta \right|^2 = 1 + \frac{1}{24} \left| \frac{h\omega^\ddagger}{k_B T} \right|^2 \quad (\text{S8})$$

$$k(T) = k'(T) * \kappa(T) \quad (\text{S9})$$

where  $k_B$  is the Boltzmann constant,  $1.3807 \times 10^{-23} \text{ J K}^{-1}$ .  $T$  is the absolute temperature (K).  $h$  is the

Planck constant,  $6.626 \times 10^{-34} \text{ J S}$ ,  $h = \frac{h}{2\pi} = 1.05510^{-34} \text{ J S}$ .  $c^0$  is the standard concentration ( $1 \text{ mol dm}^{-3}$ ).  $\Delta G^\ddagger$  is the activation Gibbs free energy barrier ( $\text{J mol}^{-1}$ ).  $\omega^\ddagger$  is the imaginary frequency of transient states ( $\text{cm}^{-1}$ ).

---

### 13.3 Activation strain-distortion/interaction model analysis

To gain insight into the physical factors controlling the chemoselectivity of palladium-catalyzed cyclization, activation strain model (ASM) or distortion/interaction model analysis<sup>13</sup> for the key transition states is performed at the M06-L/6-311++G(d,p),SDD\*(PCM-SMD,DCM)//M06-L/6-31G(d),SDD\*(PCM-SMD,DCM) level. The height of the activation barriers and trends in reactivity upon changing the structure of the reactants are analysed using the activation strain model (ASM) of chemical reactivity.<sup>13</sup>

In this model, the activation energies  $\Delta E^\ddagger$  of transition state (TS) are decomposed into the activation strain  $E^\ddagger_{\text{strain}}$  (or distortion energies  $E^\ddagger_{\text{dist}}$ ) and the stabilizing TS interaction energies  $\Delta E^\ddagger_{\text{int}}$ :

$$\Delta E^\ddagger = \Delta E^\ddagger_{\text{strain}} + \Delta E^\ddagger_{\text{int}} \quad (\text{S10})$$

The activation strain  $\Delta E^\ddagger_{\text{strain}}$  (or  $E^\ddagger_{\text{dist}}$ ) is the strain energy associated with deforming the reactants from their equilibrium geometry to the geometry they adopt in the TS (the energy penalty for distorting the reactants into the transition state geometry).  $\Delta E^\ddagger_{\text{strain}}$  is typically a positive value, that is destabilizing, and thus a factor that gives rise to the activation barrier. The stabilizing TS interaction energies  $\Delta E^\ddagger_{\text{int}}$  is the actual interaction energy between the deformed reactants in the TS.  $\Delta E^\ddagger_{\text{int}}$  is a negative value, that is stabilizing, and therefore a factor that counteracts the strain term  $\Delta E^\ddagger_{\text{strain}}$  and causes the eventual height of the reaction barrier to become lower than if strain were the only factor<sup>3</sup>.

---

#### 14. Cartesian coordinates of all the optimized structures

|           |           |           |           |           |           |           |           |
|-----------|-----------|-----------|-----------|-----------|-----------|-----------|-----------|
| <b>1a</b> |           |           |           | 1         | -5.802096 | 1.256079  | 0.006658  |
| 6         | -1.237320 | 0.496819  | 1.433997  | 1         | -3.630853 | -2.465105 | -0.025504 |
| 6         | -0.585148 | 0.381600  | 0.046039  | 1         | -1.384300 | 2.619091  | 0.006513  |
| 1         | -0.729775 | -0.120830 | 2.184273  | 6         | 3.674719  | -0.320003 | 0.002075  |
| 1         | -1.324754 | 1.524213  | 1.794856  | 6         | 3.641375  | -1.722947 | -0.007622 |
| 8         | -2.557968 | -0.024185 | 1.232519  | 6         | 4.916787  | 0.338747  | 0.010978  |
| 6         | -0.857769 | 1.602824  | -0.792272 | 6         | 4.822857  | -2.451777 | -0.008291 |
| 6         | 0.054930  | 2.316894  | -1.446389 | 1         | 2.689392  | -2.253128 | -0.014782 |
| 1         | -1.912004 | 1.889632  | -0.830919 | 6         | 6.093949  | -0.394987 | 0.010490  |
| 6         | 0.860913  | -0.033140 | 0.076968  | 1         | 4.935500  | 1.426033  | 0.018420  |
| 6         | 1.381165  | -0.895969 | -0.890070 | 6         | 6.050335  | -1.790056 | 0.000627  |
| 6         | 1.712979  | 0.505870  | 1.044834  | 1         | 4.786502  | -3.538847 | -0.015887 |
| 6         | 2.732992  | -1.230938 | -0.875336 | 1         | 7.051840  | 0.121106  | 0.017700  |
| 1         | 0.723498  | -1.311602 | -1.650894 | 1         | 6.975554  | -2.363175 | 0.000105  |
| 6         | 3.065716  | 0.175729  | 1.053489  | 17        | -6.336017 | -1.556771 | -0.013868 |
| 1         | 1.320012  | 1.193220  | 1.794693  |           |           |           |           |
| 6         | 3.578190  | -0.696544 | 0.095032  | <b>3a</b> |           |           |           |
| 1         | 3.126636  | -1.912136 | -1.627673 | 6         | 0.899515  | 0.390454  | 0.840193  |
| 1         | 3.719651  | 0.600005  | 1.813273  | 6         | -1.324399 | -0.584501 | -0.171428 |
| 1         | 4.634546  | -0.958484 | 0.104198  | 6         | -0.093379 | -1.299221 | -0.613388 |
| 6         | -2.556122 | -0.806854 | 0.133820  | 7         | 1.043893  | -0.753771 | -0.047348 |
| 8         | -1.390451 | -0.704440 | -0.534208 | 8         | -0.088780 | -2.247390 | -1.385440 |
| 8         | -3.477394 | -1.499716 | -0.207079 | 16        | -0.978790 | 0.583727  | 1.082348  |
| 1         | 1.114330  | 2.063635  | -1.428380 | 6         | -2.511817 | -0.947939 | -0.712340 |
| 1         | -0.229815 | 3.192500  | -2.025987 | 6         | -3.861238 | -0.498168 | -0.456723 |
|           |           |           |           | 6         | -4.905256 | -1.139425 | -1.154363 |
| <b>2a</b> |           |           |           | 6         | -4.211707 | 0.532100  | 0.437554  |
| 6         | 2.455616  | 0.474717  | 0.002523  | 6         | -6.232568 | -0.784073 | -0.973182 |
| 6         | 0.097632  | 1.217063  | 0.000897  | 1         | -4.659571 | -1.938348 | -1.852670 |
| 6         | 1.141679  | 2.288919  | 0.006894  | 6         | -5.535617 | 0.902415  | 0.628728  |
| 7         | 2.440235  | 1.769618  | 0.007596  | 1         | -3.448251 | 1.074141  | 0.990499  |
| 8         | 0.889225  | 3.483978  | 0.010763  | 6         | -6.535306 | 0.238450  | -0.077357 |
| 16        | 0.867536  | -0.352823 | -0.004013 | 1         | -7.023965 | -1.292589 | -1.517412 |
| 6         | -1.218202 | 1.538981  | 0.001475  | 1         | -5.788345 | 1.702844  | 1.319164  |
| 6         | -2.414994 | 0.731777  | -0.002624 | 1         | -2.415382 | -1.734296 | -1.463503 |
| 6         | -3.652812 | 1.406428  | 0.004059  | 17        | -8.204236 | 0.701365  | 0.160711  |
| 6         | -2.434543 | -0.676585 | -0.013642 | 6         | 2.188625  | -1.560918 | 0.477614  |
| 6         | -4.856817 | 0.720190  | 0.001008  | 6         | 2.170121  | -3.002681 | 0.059363  |
| 1         | -3.660523 | 2.495252  | 0.012132  | 1         | 2.227751  | -3.171980 | -1.013753 |
| 6         | -3.629692 | -1.378471 | -0.017071 | 6         | 2.207753  | -4.028367 | 0.909371  |
| 1         | -1.510981 | -1.250226 | -0.019879 | 1         | 2.173130  | -3.905150 | 1.991269  |
| 6         | -4.831389 | -0.672178 | -0.009748 | 1         | 2.284942  | -5.050433 | 0.543983  |

|             |           |           |           |            |           |           |           |
|-------------|-----------|-----------|-----------|------------|-----------|-----------|-----------|
| 6           | 1.471980  | 1.675536  | 0.272319  | 1          | -5.734162 | 1.606419  | 1.311825  |
| 6           | 2.497164  | 2.355264  | 0.930230  | 1          | -2.272285 | -1.747534 | -1.463066 |
| 6           | 1.016188  | 2.144055  | -0.963912 | 17         | -8.116622 | 0.599091  | 0.092312  |
| 6           | 3.066647  | 3.488762  | 0.351413  | 6          | 2.319244  | -1.567178 | 0.571313  |
| 1           | 2.858370  | 1.987270  | 1.886843  | 6          | 2.228406  | -3.039586 | 0.280970  |
| 6           | 1.592209  | 3.267876  | -1.543210 | 1          | 1.295606  | -3.509962 | 0.593141  |
| 1           | 0.215758  | 1.615176  | -1.482846 | 6          | 3.217620  | -3.781830 | -0.212538 |
| 6           | 2.621593  | 3.944051  | -0.886158 | 1          | 4.169145  | -3.355155 | -0.527324 |
| 1           | 3.868290  | 4.011084  | 0.870569  | 1          | 3.103428  | -4.858266 | -0.320616 |
| 1           | 1.237191  | 3.618288  | -2.510695 | 6          | 1.518399  | 1.630772  | 0.376656  |
| 1           | 3.072865  | 4.824516  | -1.340492 | 6          | 2.562632  | 2.306333  | 1.008608  |
| 6           | 3.501562  | -0.940635 | -0.006478 | 6          | 1.038224  | 2.099208  | -0.850622 |
| 6           | 4.657329  | -0.995315 | 0.776174  | 6          | 3.129417  | 3.431973  | 0.412942  |
| 6           | 3.569458  | -0.355515 | -1.274233 | 1          | 2.943409  | 1.938672  | 1.957577  |
| 6           | 5.848306  | -0.437964 | 0.315837  | 6          | 1.609076  | 3.218292  | -1.445023 |
| 1           | 4.637934  | -1.477562 | 1.753021  | 1          | 0.223373  | 1.575908  | -1.352707 |
| 6           | 4.759435  | 0.199390  | -1.735931 | 6          | 2.658779  | 3.888233  | -0.814596 |
| 1           | 2.672097  | -0.316116 | -1.891259 | 1          | 3.948378  | 3.947476  | 0.911574  |
| 6           | 5.901735  | 0.168270  | -0.937305 | 1          | 1.234547  | 3.569177  | -2.404926 |
| 1           | 6.737258  | -0.476270 | 0.942913  | 1          | 3.106952  | 4.763251  | -1.282316 |
| 1           | 4.790320  | 0.664920  | -2.719897 | 6          | 3.575711  | -0.911441 | 0.012971  |
| 1           | 6.831484  | 0.608167  | -1.293656 | 6          | 4.728439  | -0.716479 | 0.774854  |
| 8           | 1.552091  | 0.056810  | 2.025949  | 6          | 3.576505  | -0.511256 | -1.328054 |
| 6           | 1.914913  | -1.323308 | 1.964580  | 6          | 5.849879  | -0.104595 | 0.214545  |
| 1           | 1.079062  | -1.955273 | 2.299602  | 1          | 4.763231  | -1.032526 | 1.816073  |
| 1           | 2.767443  | -1.462251 | 2.632418  | 6          | 4.695387  | 0.092906  | -1.890144 |
|             |           |           |           | 1          | 2.679559  | -0.668082 | -1.927610 |
|             |           |           |           | 6          | 5.835624  | 0.306391  | -1.115454 |
| <b>3a-1</b> |           |           |           | 1          | 6.736831  | 0.053666  | 0.825753  |
| 6           | 0.966130  | 0.342800  | 0.963445  | 1          | 4.676438  | 0.401813  | -2.933838 |
| 6           | -1.222065 | -0.636239 | -0.106551 | 1          | 6.710242  | 0.787984  | -1.549506 |
| 6           | 0.025492  | -1.328934 | -0.542555 | 8          | 1.634422  | 0.033788  | 2.146721  |
| 7           | 1.130958  | -0.802845 | 0.088635  | 6          | 2.080894  | -1.320186 | 2.070389  |
| 8           | 0.063947  | -2.244123 | -1.353477 | 1          | 1.300796  | -2.002681 | 2.438599  |
| 16          | -0.915241 | 0.488868  | 1.200740  | 1          | 2.964521  | -1.411684 | 2.704704  |
| 6           | -2.392810 | -0.985843 | -0.690166 |            |           |           |           |
| 6           | -3.751647 | -0.552039 | -0.455394 | <b>3a'</b> |           |           |           |
| 6           | -4.775124 | -1.190924 | -1.184748 | 6          | -1.425911 | 1.183082  | -0.558576 |
| 6           | -4.129192 | 0.461765  | 0.446500  | 6          | 0.590338  | -0.290872 | 0.193127  |
| 6           | -6.109048 | -0.850324 | -1.024820 | 6          | -0.707783 | -0.658859 | 0.837467  |
| 1           | -4.508073 | -1.976497 | -1.890409 | 7          | -1.756947 | 0.068127  | 0.300000  |
| 6           | -5.459925 | 0.818081  | 0.615623  | 8          | -0.831751 | -1.502548 | 1.711512  |
| 1           | -3.381027 | 1.003376  | 1.020632  | 16         | 0.348324  | 0.747559  | -1.198732 |
| 6           | -6.439075 | 0.155653  | -0.120064 | 6          | 1.728853  | -0.835733 | 0.686340  |
| 1           | -6.884905 | -1.357329 | -1.592458 |            |           |           |           |

|    |           |           |           |              |           |           |           |
|----|-----------|-----------|-----------|--------------|-----------|-----------|-----------|
| 6  | 3.107144  | -0.731792 | 0.263468  | <b>3a'-1</b> |           |           |           |
| 6  | 4.070867  | -1.452518 | 0.998428  | 6            | 1.018196  | 0.217638  | 0.846496  |
| 6  | 3.560284  | 0.037769  | -0.825800 | 6            | -1.267550 | -0.661052 | -0.103658 |
| 6  | 5.418056  | -1.412962 | 0.674970  | 6            | -0.080727 | -1.452726 | -0.542552 |
| 1  | 3.745974  | -2.055690 | 1.845237  | 7            | 1.103737  | -0.942683 | -0.023985 |
| 6  | 4.905869  | 0.089982  | -1.162344 | 8            | -0.156124 | -2.419019 | -1.284111 |
| 1  | 2.862334  | 0.618993  | -1.423636 | 16           | -0.847406 | 0.524891  | 1.104346  |
| 6  | 5.823339  | -0.636681 | -0.408031 | 6            | -2.480487 | -0.980830 | -0.615280 |
| 1  | 6.145819  | -1.974669 | 1.254884  | 6            | -3.799828 | -0.449369 | -0.358778 |
| 1  | 5.239046  | 0.691240  | -2.004265 | 6            | -4.888014 | -1.063956 | -1.011839 |
| 1  | 1.555435  | -1.475006 | 1.554381  | 6            | -4.080857 | 0.639093  | 0.490295  |
| 17 | 7.520725  | -0.568878 | -0.824624 | 6            | -6.191016 | -0.627338 | -0.832722 |
| 6  | -3.076434 | -0.490603 | -0.122812 | 1            | -4.695930 | -1.905835 | -1.675527 |
| 6  | -1.335429 | 2.533571  | 0.111879  | 6            | -5.379539 | 1.091654  | 0.678045  |
| 6  | -1.619608 | 3.688685  | -0.620517 | 1            | -3.281492 | 1.162533  | 1.009048  |
| 6  | -0.935505 | 2.645861  | 1.446140  | 6            | -6.424059 | 0.452924  | 0.014927  |
| 6  | -1.515076 | 4.940308  | -0.020087 | 1            | -7.015884 | -1.115824 | -1.344624 |
| 1  | -1.928285 | 3.606590  | -1.660382 | 1            | -5.578698 | 1.936139  | 1.332644  |
| 6  | -0.834428 | 3.898947  | 2.043193  | 1            | -2.438486 | -1.797592 | -1.338327 |
| 1  | -0.714921 | 1.751992  | 2.028665  | 17           | -8.061033 | 1.025459  | 0.241545  |
| 6  | -1.124558 | 5.050048  | 1.313048  | 6            | 2.232357  | -1.783450 | 0.534940  |
| 1  | -1.745373 | 5.833709  | -0.597689 | 6            | 1.621156  | 1.482514  | 0.279221  |
| 1  | -0.532599 | 3.972926  | 3.086396  | 6            | 2.266329  | 2.394680  | 1.116698  |
| 1  | -1.046650 | 6.029016  | 1.782372  | 6            | 1.509058  | 1.756932  | -1.085904 |
| 8  | -2.373066 | 1.217805  | -1.564779 | 6            | 2.798242  | 3.568759  | 0.588962  |
| 6  | -3.021561 | -0.052147 | -1.600971 | 1            | 2.362736  | 2.176839  | 2.178095  |
| 1  | -2.440043 | -0.757178 | -2.209992 | 6            | 2.046284  | 2.928202  | -1.609878 |
| 1  | -4.006919 | 0.094566  | -2.050572 | 1            | 1.007986  | 1.044169  | -1.740297 |
| 6  | -4.203220 | 0.225508  | 0.579721  | 6            | 2.691705  | 3.838658  | -0.773712 |
| 6  | -3.170053 | -2.005712 | -0.012645 | 1            | 3.303762  | 4.272764  | 1.247876  |
| 6  | -4.182837 | -2.611284 | 0.734115  | 1            | 1.963190  | 3.129017  | -2.676587 |
| 6  | -2.258057 | -2.824578 | -0.692046 | 1            | 3.111868  | 4.755061  | -1.184312 |
| 6  | -4.295949 | -3.999639 | 0.786590  | 8            | 1.649525  | -0.121286 | 2.046464  |
| 1  | -4.890838 | -1.995786 | 1.285435  | 6            | 1.936904  | -1.518174 | 2.009921  |
| 6  | -2.364561 | -4.208963 | -0.633678 | 1            | 1.059649  | -2.093924 | 2.339440  |
| 1  | -1.440584 | -2.379944 | -1.260594 | 1            | 2.769392  | -1.703696 | 2.693387  |
| 6  | -3.390118 | -4.803105 | 0.101772  | 6            | 3.532237  | -1.158265 | 0.069814  |
| 1  | -5.096379 | -4.451334 | 1.369973  | 6            | 2.222759  | -3.244978 | 0.130299  |
| 1  | -1.642337 | -4.826303 | -1.165146 | 6            | 2.473730  | -3.611481 | -1.199187 |
| 1  | -3.476746 | -5.887353 | 0.143057  | 6            | 2.076724  | -4.254180 | 1.085153  |
| 1  | -5.184213 | 0.076420  | 0.124113  | 6            | 2.554584  | -4.947938 | -1.565465 |
| 6  | -4.074968 | 0.990033  | 1.660080  | 1            | 2.575993  | -2.839309 | -1.959324 |
| 1  | -4.935118 | 1.481231  | 2.110350  | 6            | 2.163029  | -5.597802 | 0.718734  |
| 1  | -3.107823 | 1.148201  | 2.136629  | 1            | 1.901399  | -4.008528 | 2.130372  |

|           |           |           |           |             |           |           |           |
|-----------|-----------|-----------|-----------|-------------|-----------|-----------|-----------|
| 6         | 2.399051  | -5.949399 | -0.605390 | 1           | -0.178234 | -1.850654 | -1.953565 |
| 1         | 2.738722  | -5.210834 | -2.605747 | 6           | -0.091251 | 3.151011  | -0.058046 |
| 1         | 2.046019  | -6.368114 | 1.478829  | 6           | 0.326491  | 4.166040  | -0.935974 |
| 1         | 2.463860  | -6.997733 | -0.891611 | 6           | -0.851103 | 3.490437  | 1.072234  |
| 1         | 3.650187  | -1.146437 | -1.014987 | 6           | -0.008690 | 5.488238  | -0.682218 |
| 6         | 4.491793  | -0.651821 | 0.840385  | 1           | 0.915012  | 3.896423  | -1.809597 |
| 1         | 5.397855  | -0.240314 | 0.399814  | 6           | -1.184246 | 4.814708  | 1.320829  |
| 1         | 4.426665  | -0.614761 | 1.926962  | 1           | -1.190069 | 2.717091  | 1.760852  |
|           |           |           |           | 6           | -0.763134 | 5.815515  | 0.445530  |
| <b>4a</b> |           |           |           | 1           | 0.320194  | 6.269069  | -1.364752 |
| 6         | 1.467123  | -2.974180 | -0.262026 | 1           | -1.774364 | 5.067812  | 2.198614  |
| 6         | 1.715974  | -1.625244 | 0.444414  | 1           | -1.024458 | 6.853524  | 0.642314  |
| 8         | 0.058276  | -3.079471 | -0.327763 | 17          | -6.239409 | -0.878031 | 0.131267  |
| 6         | 1.326774  | -1.817654 | 1.895481  | 1           | 1.844031  | -3.835089 | 0.297988  |
| 6         | 2.097695  | -1.633336 | 2.966054  | 1           | 1.903794  | -2.972042 | -1.273586 |
| 1         | 0.310850  | -2.199155 | 2.032244  | 1           | 1.717845  | -1.844423 | 3.963965  |
| 6         | 3.129969  | -1.102474 | 0.296419  | 1           | 3.121846  | -1.268495 | 2.900871  |
| 6         | 4.165825  | -1.934130 | -0.138705 |             |           |           |           |
| 6         | 3.440590  | 0.217035  | 0.649504  | <b>4a-1</b> |           |           |           |
| 6         | 5.471818  | -1.456679 | -0.236651 | 6           | 0.491123  | -2.614456 | -0.417457 |
| 1         | 3.962363  | -2.969978 | -0.404662 | 6           | 0.495771  | -1.182529 | 0.123322  |
| 6         | 4.742413  | 0.697965  | 0.547352  | 8           | -0.879182 | -2.941924 | -0.554092 |
| 1         | 2.655437  | 0.874573  | 1.025298  | 6           | 0.088963  | -1.138470 | 1.584902  |
| 6         | 5.764735  | -0.138489 | 0.101409  | 6           | -0.326061 | -2.158014 | 2.335991  |
| 1         | 6.262080  | -2.121927 | -0.580848 | 1           | 0.183066  | -0.151802 | 2.043584  |
| 1         | 4.959027  | 1.728902  | 0.821990  | 6           | 1.837847  | -0.477238 | -0.007515 |
| 1         | 6.784101  | 0.235266  | 0.022505  | 6           | 3.000843  | -1.183268 | -0.329504 |
| 6         | 0.280729  | 1.770633  | -0.340077 | 6           | 1.942159  | 0.896575  | 0.245814  |
| 6         | 0.609829  | -0.747189 | -0.280905 | 6           | 4.230241  | -0.532033 | -0.411612 |
| 6         | 1.180712  | 0.066481  | -1.465126 | 1           | 2.958692  | -2.254089 | -0.520359 |
| 7         | 0.949207  | 1.430658  | -1.406496 | 6           | 3.167648  | 1.550098  | 0.156831  |
| 8         | 1.752619  | -0.494336 | -2.383312 | 1           | 1.053453  | 1.465630  | 0.522699  |
| 16        | -0.158141 | 0.497328  | 0.803895  | 6           | 4.318583  | 0.836677  | -0.173322 |
| 6         | -0.376428 | -1.847685 | -0.867599 | 1           | 5.122372  | -1.101903 | -0.665788 |
| 6         | -1.840338 | -1.647860 | -0.624802 | 1           | 3.222305  | 2.620121  | 0.350506  |
| 6         | -2.541723 | -0.723673 | -1.403731 | 1           | 5.278769  | 1.345044  | -0.241679 |
| 6         | -2.512445 | -2.336726 | 0.385558  | 6           | -1.265587 | 1.858640  | -1.246158 |
| 6         | -3.890721 | -0.477018 | -1.177555 | 6           | -0.655175 | -0.562308 | -0.777752 |
| 1         | -2.025398 | -0.183549 | -2.198173 | 6           | -0.088646 | 0.134653  | -2.034576 |
| 6         | -3.865598 | -2.108996 | 0.621548  | 7           | -0.477494 | 1.453262  | -2.201896 |
| 1         | -1.976501 | -3.064740 | 0.990728  | 8           | 0.622974  | -0.476273 | -2.812952 |
| 6         | -4.536689 | -1.176614 | -0.161789 | 16          | -1.652906 | 0.717341  | 0.047089  |
| 1         | -4.433916 | 0.243682  | -1.783379 | 6           | -1.462071 | -1.853751 | -1.241296 |
| 1         | -4.389429 | -2.647984 | 1.406766  | 6           | -2.944455 | -1.833981 | -1.026135 |

|            |           |           |           |              |           |           |           |
|------------|-----------|-----------|-----------|--------------|-----------|-----------|-----------|
| 6          | -3.770480 | -1.227156 | -1.975118 | 6            | -1.200189 | 0.694588  | -2.006606 |
| 6          | -3.513956 | -2.371109 | 0.129456  | 7            | -2.279596 | -0.142853 | -1.791061 |
| 6          | -5.144260 | -1.141939 | -1.776780 | 8            | -1.002109 | 1.289654  | -3.051728 |
| 1          | -3.334086 | -0.808954 | -2.882932 | 16           | -0.847973 | -0.351632 | 0.417421  |
| 6          | -4.887330 | -2.303353 | 0.341863  | 6            | 1.258909  | 0.609979  | -1.390964 |
| 1          | -2.877162 | -2.849841 | 0.870590  | 6            | 2.044545  | -0.590396 | -0.948020 |
| 6          | -5.685240 | -1.683505 | -0.614493 | 6            | 1.621788  | -1.865015 | -1.340029 |
| 1          | -5.785526 | -0.670376 | -2.516958 | 6            | 3.211927  | -0.467255 | -0.193085 |
| 1          | -5.331809 | -2.725075 | 1.239952  | 6            | 2.333915  | -3.000324 | -0.972597 |
| 1          | -1.245253 | -1.955039 | -2.318654 | 1            | 0.723237  | -1.974017 | -1.948604 |
| 6          | -1.824150 | 3.204251  | -1.213043 | 6            | 3.941124  | -1.593229 | 0.182345  |
| 6          | -1.533304 | 4.089926  | -2.265429 | 1            | 3.557704  | 0.520425  | 0.102923  |
| 6          | -2.645027 | 3.636235  | -0.159345 | 6            | 3.489196  | -2.847140 | -0.210200 |
| 6          | -2.054615 | 5.375328  | -2.259070 | 1            | 2.001050  | -3.988639 | -1.279176 |
| 1          | -0.897855 | 3.749463  | -3.079559 | 1            | 4.850206  | -1.493993 | 0.769783  |
| 6          | -3.161795 | 4.924400  | -0.157072 | 1            | 1.117763  | 0.547736  | -2.482920 |
| 1          | -2.883502 | 2.965781  | 0.665865  | 6            | -3.247526 | -1.649844 | -0.162888 |
| 6          | -2.868320 | 5.795563  | -1.206105 | 6            | -4.349790 | -1.925282 | -0.990863 |
| 1          | -1.826949 | 6.054303  | -3.078083 | 6            | -3.163993 | -2.264590 | 1.096439  |
| 1          | -3.795870 | 5.250191  | 0.664464  | 6            | -5.344185 | -2.792039 | -0.561555 |
| 1          | -3.275749 | 6.804841  | -1.203125 | 1            | -4.409355 | -1.447639 | -1.965787 |
| 17         | -7.415950 | -1.592695 | -0.352336 | 6            | -4.162009 | -3.130383 | 1.520926  |
| 1          | 0.948337  | -3.341087 | 0.261405  | 1            | -2.316796 | -2.065309 | 1.751707  |
| 1          | 0.995714  | -2.660933 | -1.395301 | 6            | -5.253471 | -3.395083 | 0.693888  |
| 1          | -0.563092 | -2.007781 | 3.387691  | 1            | -6.195216 | -3.000536 | -1.206424 |
| 1          | -0.447462 | -3.169374 | 1.951853  | 1            | -4.089448 | -3.600324 | 2.499084  |
|            |           |           |           | 1            | -6.036171 | -4.073114 | 1.028911  |
| <b>4a'</b> |           |           |           | 17           | 4.403610  | -4.270034 | 0.252964  |
| 6          | 0.989971  | 2.842639  | -1.148092 | 6            | -1.489029 | 2.988445  | -0.579311 |
| 6          | -0.170538 | 2.317801  | -0.277537 | 1            | -1.554117 | 3.477748  | -1.552661 |
| 8          | 1.958324  | 1.809233  | -1.106062 | 6            | -2.569652 | 2.939915  | 0.199288  |
| 6          | 0.270456  | 2.447727  | 1.182890  | 1            | -3.509224 | 3.391951  | -0.112897 |
| 6          | -0.061722 | 3.591320  | 1.922585  | 1            | -2.559538 | 2.460272  | 1.178803  |
| 6          | 1.145442  | 1.529283  | 1.775217  | 1            | 0.650734  | 3.020660  | -2.181288 |
| 6          | 0.433992  | 3.787795  | 3.209341  | 1            | 1.449789  | 3.753477  | -0.753429 |
| 1          | -0.715976 | 4.343430  | 1.487635  |              |           |           |           |
| 6          | 1.642656  | 1.719760  | 3.061821  | <b>4a'-1</b> |           |           |           |
| 1          | 1.462821  | 0.643136  | 1.230902  | 6            | 0.635365  | -2.667632 | -0.164948 |
| 6          | 1.285527  | 2.850747  | 3.789874  | 6            | 0.886641  | -1.144652 | -0.108173 |
| 1          | 0.151671  | 4.684364  | 3.759078  | 8            | -0.213679 | -2.926852 | -1.271565 |
| 1          | 2.316552  | 0.978301  | 3.488289  | 6            | 0.799516  | -0.645637 | 1.341501  |
| 1          | 1.669653  | 3.002938  | 4.797073  | 6            | 1.851957  | 0.042281  | 1.951906  |
| 6          | -2.221308 | -0.725542 | -0.627565 | 6            | -0.349763 | -0.892836 | 2.108200  |
| 6          | -0.202962 | 0.819998  | -0.815888 | 6            | 1.758560  | 0.475336  | 3.275295  |

|    |           |           |           |             |           |           |           |
|----|-----------|-----------|-----------|-------------|-----------|-----------|-----------|
| 1  | 2.765658  | 0.241085  | 1.395998  | <b>4a''</b> |           |           |           |
| 6  | -0.448069 | -0.460881 | 3.425287  | 6           | 2.133322  | -2.989143 | -0.731052 |
| 1  | -1.192617 | -1.427861 | 1.668889  | 6           | 2.095999  | -1.789940 | 0.246978  |
| 6  | 0.609732  | 0.227810  | 4.018196  | 8           | 0.869069  | -3.056158 | -1.389690 |
| 1  | 2.596046  | 1.007672  | 3.723407  | 6           | 1.488142  | -2.257821 | 1.555438  |
| 1  | -1.355233 | -0.667532 | 3.990916  | 6           | 1.910539  | -1.945047 | 2.779770  |
| 1  | 0.537107  | 0.565041  | 5.050711  | 1           | 0.625722  | -2.921137 | 1.446865  |
| 6  | -0.665428 | 1.820170  | -1.743328 | 6           | 3.473888  | -1.192083 | 0.456003  |
| 6  | -0.313162 | -0.606008 | -1.038662 | 6           | 4.560627  | -2.059678 | 0.625564  |
| 6  | 0.207577  | -0.115298 | -2.429826 | 6           | 3.702609  | 0.182158  | 0.556005  |
| 7  | 0.015579  | 1.234959  | -2.684415 | 6           | 5.838831  | -1.567593 | 0.869932  |
| 8  | 0.709401  | -0.882989 | -3.226382 | 1           | 4.401494  | -3.136849 | 0.573430  |
| 16 | -1.168967 | 0.846375  | -0.357499 | 6           | 4.981798  | 0.679077  | 0.801706  |
| 6  | -1.170770 | -1.889314 | -1.341255 | 1           | 2.879233  | 0.886089  | 0.443272  |
| 6  | -2.401544 | -2.170588 | -0.500664 | 6           | 6.054539  | -0.193276 | 0.959460  |
| 6  | -3.527621 | -1.342367 | -0.571254 | 1           | 6.668116  | -2.262298 | 0.992816  |
| 6  | -2.472396 | -3.322990 | 0.286634  | 1           | 5.134626  | 1.754708  | 0.870517  |
| 6  | -4.674757 | -1.622240 | 0.164356  | 1           | 7.053501  | 0.194237  | 1.151511  |
| 1  | -3.522949 | -0.470025 | -1.222032 | 6           | 0.435862  | 1.545860  | -0.783528 |
| 6  | -3.610072 | -3.621348 | 1.030883  | 6           | 1.064775  | -0.882359 | -0.494574 |
| 1  | -1.631903 | -4.012013 | 0.306970  | 6           | 1.657572  | -0.098570 | -1.680268 |
| 6  | -4.695966 | -2.756553 | 0.970271  | 7           | 1.178339  | 1.201500  | -1.796293 |
| 1  | -5.544172 | -0.972716 | 0.103684  | 8           | 2.426722  | -0.614716 | -2.470596 |
| 1  | -3.650200 | -4.517851 | 1.644191  | 16          | 0.198234  | 0.355392  | 0.511405  |
| 1  | -1.487338 | -1.846920 | -2.391564 | 6           | 0.059149  | -1.955135 | -1.039006 |
| 6  | -1.022792 | 3.232505  | -1.802213 | 6           | -0.182206 | 2.860487  | -0.674600 |
| 6  | -0.714422 | 3.962660  | -2.962896 | 6           | 0.021036  | 3.798937  | -1.701186 |
| 6  | -1.664403 | 3.878940  | -0.734503 | 6           | -0.973660 | 3.211281  | 0.430071  |
| 6  | -1.044292 | 5.307388  | -3.049544 | 6           | -0.558977 | 5.056535  | -1.619914 |
| 1  | -0.219038 | 3.455027  | -3.786791 | 1           | 0.635276  | 3.520849  | -2.554137 |
| 6  | -1.990425 | 5.225505  | -0.825986 | 6           | -1.548937 | 4.472137  | 0.507708  |
| 1  | -1.903992 | 3.333673  | 0.177842  | 1           | -1.145645 | 2.497045  | 1.234540  |
| 6  | -1.682478 | 5.941358  | -1.982576 | 6           | -1.343101 | 5.396334  | -0.516242 |
| 1  | -0.804193 | 5.865697  | -3.952044 | 1           | -0.399523 | 5.778001  | -2.418346 |
| 1  | -2.485047 | 5.719059  | 0.007498  | 1           | -2.159374 | 4.735141  | 1.368474  |
| 1  | -1.940486 | 6.996440  | -2.052348 | 1           | -1.795550 | 6.384258  | -0.454519 |
| 17 | -6.134381 | -3.117611 | 1.904516  | 1           | 2.304249  | -3.936158 | -0.202481 |
| 6  | 2.208867  | -0.721301 | -0.712495 | 1           | 2.916728  | -2.854735 | -1.486968 |
| 1  | 2.287265  | 0.354254  | -0.900034 | 1           | 1.401450  | -2.332086 | 3.660479  |
| 6  | 3.267200  | -1.480213 | -0.983012 | 1           | 2.770190  | -1.298973 | 2.956064  |
| 1  | 4.172211  | -1.038631 | -1.395913 | 6           | -0.783275 | -1.507948 | -2.201287 |
| 1  | 3.296045  | -2.555850 | -0.816404 | 6           | -0.379651 | -1.733688 | -3.519508 |
| 1  | 1.542648  | -3.257109 | -0.317603 | 6           | -1.973943 | -0.816100 | -1.962903 |
| 1  | 0.171045  | -3.008169 | 0.772399  | 6           | -1.147269 | -1.276272 | -4.585742 |



|               |           |           |           |              |           |           |           |
|---------------|-----------|-----------|-----------|--------------|-----------|-----------|-----------|
| 1             | 0.541510  | -2.279339 | -3.708839 | 1            | -3.623459 | 5.809353  | 0.077666  |
| 6             | -2.745993 | -0.336894 | -3.016077 | 1            | 2.977360  | -3.108241 | 0.752023  |
| 1             | -2.311223 | -0.655707 | -0.939181 | 1            | 2.369795  | -2.608692 | -0.849925 |
| 6             | -2.319380 | -0.575772 | -4.318396 | 1            | 3.030900  | -1.537139 | 4.044459  |
| 1             | -0.838408 | -1.461482 | -5.611436 | 1            | 2.455901  | -2.797389 | 2.815872  |
| 1             | -3.670556 | 0.202470  | -2.827476 | 6            | -1.284422 | -1.971672 | 0.579440  |
| 17            | -3.294647 | 0.002676  | -5.654462 | 6            | -1.610423 | -2.662362 | -0.591085 |
| 1             | -0.610409 | -2.220814 | -0.203038 | 6            | -2.303775 | -1.362873 | 1.316068  |
|               |           |           |           | 6            | -2.928305 | -2.738739 | -1.027416 |
| <b>4a''-1</b> |           |           |           | 1            | -0.821053 | -3.141221 | -1.165254 |
| 6             | 2.241188  | -2.483840 | 0.231415  | 6            | -3.626877 | -1.416827 | 0.887974  |
| 6             | 2.367410  | -1.001301 | 0.621671  | 1            | -2.063619 | -0.840385 | 2.241912  |
| 8             | 0.928482  | -2.918035 | 0.589481  | 6            | -3.920352 | -2.106788 | -0.283709 |
| 6             | 2.754594  | -0.822220 | 2.078686  | 1            | -3.181748 | -3.281293 | -1.934742 |
| 6             | 2.746090  | -1.766480 | 3.019620  | 1            | -4.417106 | -0.939624 | 1.461661  |
| 1             | 3.047985  | 0.196925  | 2.343050  | 17           | -5.583530 | -2.197757 | -0.830554 |
| 6             | 3.395583  | -0.284194 | -0.237378 | 1            | 0.183070  | -1.738890 | 2.118005  |
| 6             | 4.646124  | -0.893358 | -0.406980 |              |           |           |           |
| 6             | 3.186347  | 0.971595  | -0.812459 | <b>4a'''</b> |           |           |           |
| 6             | 5.649618  | -0.275287 | -1.146036 | 6            | 0.669736  | 2.945261  | -1.920878 |
| 1             | 4.836217  | -1.864021 | 0.051920  | 6            | -0.255809 | 2.527017  | -0.763125 |
| 6             | 4.191196  | 1.594647  | -1.551034 | 8            | 1.633140  | 1.905080  | -2.030578 |
| 1             | 2.232443  | 1.484281  | -0.694218 | 6            | 0.469977  | 2.829644  | 0.550851  |
| 6             | 5.425233  | 0.973724  | -1.722784 | 6            | 0.339791  | 4.108581  | 1.114595  |
| 1             | 6.610958  | -0.771215 | -1.269976 | 6            | 1.377429  | 1.951343  | 1.152825  |
| 1             | 4.003081  | 2.571210  | -1.993880 | 6            | 1.062346  | 4.479695  | 2.243889  |
| 1             | 6.208952  | 1.461189  | -2.299796 | 1            | -0.338105 | 4.827942  | 0.659977  |
| 6             | -0.526068 | 1.465887  | -0.090408 | 6            | 2.099698  | 2.316494  | 2.288185  |
| 6             | 0.882417  | -0.561454 | 0.449070  | 1            | 1.549374  | 0.957745  | 0.746660  |
| 6             | 0.448120  | -0.326836 | -1.009555 | 6            | 1.944478  | 3.582236  | 2.842480  |
| 7             | -0.400872 | 0.761219  | -1.177660 | 1            | 0.933820  | 5.479183  | 2.656275  |
| 8             | 0.780882  | -1.075897 | -1.910083 | 1            | 2.791990  | 1.602679  | 2.730868  |
| 16            | 0.363588  | 0.931800  | 1.347626  | 1            | 2.509365  | 3.869504  | 3.727386  |
| 6             | 0.145296  | -1.823433 | 1.017880  | 6            | -2.298959 | -0.595673 | -0.601706 |
| 6             | -1.363119 | 2.655962  | -0.020339 | 6            | -0.374141 | 0.992592  | -1.124012 |
| 6             | -2.130592 | 3.013538  | -1.142377 | 6            | -1.506969 | 0.780498  | -2.171479 |
| 6             | -1.421554 | 3.450779  | 1.134895  | 7            | -2.501468 | -0.102091 | -1.788711 |
| 6             | -2.940467 | 4.139090  | -1.102446 | 8            | -1.488602 | 1.345619  | -3.250363 |
| 1             | -2.080764 | 2.392004  | -2.033050 | 16           | -0.860762 | -0.061147 | 0.278169  |
| 6             | -2.229101 | 4.579690  | 1.166945  | 6            | 1.028511  | 0.652169  | -1.743727 |
| 1             | -0.832432 | 3.193140  | 2.014537  | 6            | -3.211188 | -1.557984 | 0.001685  |
| 6             | -2.989740 | 4.925054  | 0.049841  | 6            | -4.360862 | -1.933327 | -0.715222 |
| 1             | -3.535691 | 4.407465  | -1.972478 | 6            | -2.972516 | -2.123753 | 1.263826  |
| 1             | -2.265092 | 5.192205  | 2.064911  | 6            | -5.248691 | -2.853402 | -0.178287 |



|   |           |           |           |   |           |           |           |
|---|-----------|-----------|-----------|---|-----------|-----------|-----------|
| 6 | 2.299870  | -1.505716 | -2.677190 | 6 | -1.787499 | 4.543999  | 0.038925  |
| 6 | 3.290407  | -0.141902 | -4.886843 | 6 | 0.912894  | 5.170159  | 0.308446  |
| 1 | 1.508149  | 1.052320  | -4.771127 | 1 | 1.182843  | 3.101595  | 0.803817  |
| 6 | 3.512546  | -1.889623 | -3.240818 | 6 | -1.343057 | 5.842916  | -0.202556 |
| 1 | 1.925696  | -2.021537 | -1.799074 | 1 | -2.844950 | 4.319035  | -0.056827 |
| 6 | 4.016755  | -1.200097 | -4.342979 | 6 | 0.006980  | 6.161067  | -0.068749 |
| 1 | 3.675732  | 0.397652  | -5.748361 | 1 | 1.969644  | 5.401366  | 0.413013  |
| 1 | 4.071061  | -2.713652 | -2.804744 | 1 | -2.057720 | 6.608649  | -0.493424 |
| 1 | 4.972673  | -1.484796 | -4.774791 | 1 | 0.351096  | 7.174483  | -0.258306 |
| 6 | -0.397600 | 1.599705  | -3.212369 | 6 | -1.693913 | 1.931841  | 2.589140  |
| 6 | -1.250016 | 1.698868  | -4.318150 | 6 | -1.947203 | 0.751769  | 3.297658  |
| 6 | 0.188174  | 2.765749  | -2.705636 | 6 | -1.679135 | 3.144003  | 3.288004  |
| 6 | -1.521816 | 2.940609  | -4.890787 | 6 | -2.185910 | 0.776952  | 4.668427  |
| 1 | -1.709056 | 0.805998  | -4.732448 | 1 | -1.948938 | -0.196854 | 2.771936  |
| 6 | -0.066888 | 4.003069  | -3.289095 | 6 | -1.900983 | 3.169508  | 4.664626  |
| 1 | 0.840627  | 2.704615  | -1.840575 | 1 | -1.493533 | 4.075037  | 2.761201  |
| 6 | -0.932734 | 4.095093  | -4.378340 | 6 | -2.156273 | 1.988305  | 5.358645  |
| 1 | -2.194679 | 3.003453  | -5.742331 | 1 | -2.380296 | -0.152590 | 5.197000  |
| 1 | 0.396650  | 4.896149  | -2.878505 | 1 | -1.878490 | 4.119058  | 5.193509  |
| 1 | -1.147479 | 5.062072  | -4.825666 | 1 | -2.329027 | 2.011038  | 6.431406  |
| 6 | -1.195819 | -1.123479 | -3.207517 | 6 | -0.059331 | -3.650737 | 0.138513  |
| 6 | -0.862494 | -1.898779 | -4.324308 | 6 | 0.068556  | -3.774031 | -1.250443 |
| 6 | -2.487560 | -1.224116 | -2.677440 | 6 | 0.406132  | -4.690908 | 0.949830  |
| 6 | -1.797565 | -2.768301 | -4.884074 | 6 | 0.649367  | -4.902843 | -1.818451 |
| 1 | 0.132138  | -1.831920 | -4.755557 | 1 | -0.296082 | -2.978630 | -1.892548 |
| 6 | -3.427652 | -2.076966 | -3.247857 | 6 | 1.000136  | -5.818467 | 0.381755  |
| 1 | -2.754097 | -0.640229 | -1.802094 | 1 | 0.309196  | -4.626893 | 2.029395  |
| 6 | -3.081068 | -2.859975 | -4.348529 | 6 | 1.124670  | -5.928784 | -1.001679 |
| 1 | -1.521285 | -3.372920 | -5.744271 | 1 | 0.735145  | -4.975490 | -2.899902 |
| 1 | -4.423760 | -2.142288 | -2.818154 | 1 | 1.361320  | -6.615321 | 1.027096  |
| 1 | -3.807315 | -3.540363 | -4.785462 | 1 | 1.587019  | -6.808835 | -1.440828 |
| 6 | -3.129111 | 1.867968  | 0.145209  | 6 | -2.621804 | -2.537224 | 0.442549  |
| 6 | -3.314978 | 1.839931  | -1.242246 | 6 | -3.579556 | -1.527655 | 0.580659  |
| 6 | -4.254793 | 1.948507  | 0.971595  | 6 | -3.049751 | -3.821722 | 0.087980  |
| 6 | -4.590584 | 1.887106  | -1.794575 | 6 | -4.930583 | -1.786610 | 0.369277  |
| 1 | -2.449516 | 1.789274  | -1.895239 | 1 | -3.264154 | -0.524603 | 0.844870  |
| 6 | -5.535708 | 1.983049  | 0.418996  | 6 | -4.400852 | -4.081669 | -0.135792 |
| 1 | -4.138528 | 1.980585  | 2.050700  | 1 | -2.329862 | -4.627779 | -0.013544 |
| 6 | -5.708782 | 1.951795  | -0.963206 | 6 | -5.345547 | -3.066805 | 0.003649  |
| 1 | -4.708375 | 1.866507  | -2.875181 | 1 | -5.654463 | -0.983433 | 0.478939  |
| 1 | -6.400265 | 2.039402  | 1.075623  | 1 | -4.714118 | -5.083700 | -0.417845 |
| 1 | -6.707716 | 1.979379  | -1.390165 | 1 | -6.398243 | -3.271741 | -0.172800 |
| 6 | -0.884477 | 3.539221  | 0.404809  | 6 | -0.791300 | -2.446531 | 2.600083  |
| 6 | 0.467830  | 3.871182  | 0.535717  | 6 | -1.873586 | -2.947736 | 3.332030  |

|   |           |           |           |                 |           |           |           |
|---|-----------|-----------|-----------|-----------------|-----------|-----------|-----------|
| 6 | 0.402254  | -2.166821 | 3.276848  | 15              | 0.030345  | -0.013332 | -1.227263 |
| 6 | -1.765484 | -3.150303 | 4.707913  | 6               | 1.649691  | -0.319634 | -0.417466 |
| 1 | -2.809136 | -3.180115 | 2.833022  | 6               | 2.774028  | 0.305761  | -0.977995 |
| 6 | 0.517111  | -2.384414 | 4.646231  | 6               | 1.829265  | -1.150573 | 0.695334  |
| 1 | 1.250411  | -1.771117 | 2.728957  | 6               | 4.040030  | 0.119938  | -0.430443 |
| 6 | -0.571769 | -2.870573 | 5.369480  | 1               | 2.653372  | 0.947141  | -1.852162 |
| 1 | -2.619447 | -3.532931 | 5.261278  | 6               | 3.099221  | -1.345891 | 1.235704  |
| 1 | 1.454857  | -2.160242 | 5.147824  | 1               | 0.972072  | -1.649441 | 1.146892  |
| 1 | -0.490223 | -3.029377 | 6.441521  | 6               | 4.206257  | -0.711407 | 0.676545  |
| 6 | 3.184356  | 1.764347  | 0.159004  | 1               | 4.900285  | 0.616526  | -0.876667 |
| 6 | 3.272609  | 1.928086  | -1.229122 | 1               | 3.222111  | -1.997408 | 2.099645  |
| 6 | 3.806592  | 2.704972  | 0.986475  | 1               | 5.197089  | -0.866243 | 1.100190  |
| 6 | 3.958828  | 3.005201  | -1.779968 | 6               | -0.524699 | 1.552796  | -0.443026 |
| 1 | 2.806642  | 1.198845  | -1.884186 | 6               | -1.684356 | 2.140138  | -0.971066 |
| 6 | 4.485531  | 3.792117  | 0.434775  | 6               | 0.120138  | 2.183331  | 0.627810  |
| 1 | 3.762944  | 2.596346  | 2.065897  | 6               | -2.198599 | 3.313990  | -0.430059 |
| 6 | 4.563690  | 3.947091  | -0.947627 | 1               | -2.192428 | 1.665410  | -1.811647 |
| 1 | 4.014847  | 3.109037  | -2.860806 | 6               | -0.388934 | 3.366942  | 1.161643  |
| 1 | 4.959112  | 4.516844  | 1.092343  | 1               | 1.022619  | 1.745256  | 1.054111  |
| 1 | 5.093505  | 4.794750  | -1.374061 | 6               | -1.549667 | 3.932312  | 0.638234  |
| 6 | 2.497328  | 0.499370  | 2.605129  | 1               | -3.104165 | 3.751379  | -0.847818 |
| 6 | 3.486077  | -0.172509 | 3.332739  | 1               | 0.122609  | 3.845245  | 1.995668  |
| 6 | 1.634708  | 1.364780  | 3.288796  | 1               | -1.946114 | 4.855029  | 1.058658  |
| 6 | 3.599234  | 0.011249  | 4.710708  | 6               | -1.065794 | -1.240943 | -0.410191 |
| 1 | 4.171903  | -0.847006 | 2.829269  | 6               | -1.230900 | -2.483023 | -1.039346 |
| 6 | 1.757723  | 1.563104  | 4.660646  | 6               | -1.742146 | -1.002052 | 0.793680  |
| 1 | 0.854851  | 1.884813  | 2.743754  | 6               | -2.043436 | -3.464119 | -0.476692 |
| 6 | 2.738050  | 0.879079  | 5.378957  | 1               | -0.718194 | -2.680722 | -1.981632 |
| 1 | 4.368208  | -0.525250 | 5.260923  | 6               | -2.561473 | -1.980447 | 1.351950  |
| 1 | 1.077154  | 2.241964  | 5.167773  | 1               | -1.626425 | -0.044043 | 1.300743  |
| 1 | 2.828412  | 1.020454  | 6.452730  | 6               | -2.713553 | -3.213132 | 0.719363  |
| 6 | 3.514756  | -1.010558 | 0.434290  | 1               | -2.161060 | -4.423149 | -0.978850 |
| 6 | 3.120160  | -2.349328 | 0.516618  | 1               | -3.082379 | -1.779030 | 2.287052  |
| 6 | 4.850542  | -0.724389 | 0.129131  | 1               | -3.357798 | -3.974932 | 1.155265  |
| 6 | 4.029822  | -3.380694 | 0.300849  |                 |           |           |           |
| 1 | 2.085919  | -2.587279 | 0.737742  |                 |           |           |           |
| 6 | 5.761597  | -1.754385 | -0.099140 | <b>L3-Pd-1a</b> |           |           |           |
| 1 | 5.188098  | 0.305803  | 0.072018  | 46              | 0.320643  | -0.716204 | -0.176622 |
| 6 | 5.355582  | -3.084954 | -0.013957 | 15              | -1.623038 | 2.638995  | 0.667213  |
| 1 | 3.696481  | -4.413087 | 0.366258  | 15              | 2.515409  | -0.067950 | 0.489161  |
| 1 | 6.793559  | -1.513273 | -0.341334 | 15              | 0.156462  | -0.100151 | -2.450161 |
| 1 | 6.067577  | -3.886359 | -0.193128 | 6               | 1.600650  | -0.823423 | -3.319922 |
|   |           |           |           | 6               | 2.208073  | -0.239361 | -4.436209 |
|   |           |           |           | 6               | 2.136139  | -2.011630 | -2.800032 |
|   |           |           |           | 6               | 3.338697  | -0.820709 | -5.008186 |

PPh<sub>3</sub>

|   |           |           |           |   |           |           |           |
|---|-----------|-----------|-----------|---|-----------|-----------|-----------|
| 1 | 1.807292  | 0.684030  | -4.854663 | 1 | 0.996646  | 3.621972  | 1.145207  |
| 6 | 3.263272  | -2.593941 | -3.372818 | 6 | -0.971537 | 6.639527  | -0.275747 |
| 1 | 1.669091  | -2.465035 | -1.921630 | 1 | -2.646907 | 5.298288  | -0.420726 |
| 6 | 3.872069  | -1.993118 | -4.475405 | 6 | 0.360652  | 6.797523  | 0.106501  |
| 1 | 3.809308  | -0.349495 | -5.869935 | 1 | 2.101616  | 5.831350  | 0.939197  |
| 1 | 3.672632  | -3.511308 | -2.951070 | 1 | -1.526955 | 7.484773  | -0.679572 |
| 1 | 4.760869  | -2.439095 | -4.918855 | 1 | 0.848171  | 7.764804  | -0.002994 |
| 6 | 0.087876  | 1.626119  | -3.063335 | 6 | -2.502585 | 2.962729  | 2.255101  |
| 6 | -0.489951 | 1.970217  | -4.294337 | 6 | -1.944300 | 2.450935  | 3.432065  |
| 6 | 0.631745  | 2.640195  | -2.264801 | 6 | -3.662746 | 3.744964  | 2.345768  |
| 6 | -0.514141 | 3.296764  | -4.716868 | 6 | -2.527528 | 2.706802  | 4.672174  |
| 1 | -0.924182 | 1.194921  | -4.926096 | 1 | -1.047237 | 1.833227  | 3.375630  |
| 6 | 0.619976  | 3.966477  | -2.695101 | 6 | -4.250350 | 3.996338  | 3.582095  |
| 1 | 1.061433  | 2.387594  | -1.292068 | 1 | -4.110722 | 4.156266  | 1.440720  |
| 6 | 0.042600  | 4.297155  | -3.919366 | 6 | -3.684679 | 3.477711  | 4.748006  |
| 1 | -0.970058 | 3.550091  | -5.672991 | 1 | -5.152933 | 4.602952  | 3.636796  |
| 1 | 1.039296  | 4.744769  | -2.057438 | 1 | -4.148127 | 3.674797  | 5.713217  |
| 1 | 0.019287  | 5.334672  | -4.248727 | 6 | 3.457321  | 1.206613  | -0.455962 |
| 6 | -1.262479 | -0.873273 | -3.322006 | 6 | 4.011875  | 0.886368  | -1.705116 |
| 6 | -1.118034 | -1.813537 | -4.348307 | 6 | 3.558715  | 2.530225  | -0.004469 |
| 6 | -2.555043 | -0.536157 | -2.892888 | 6 | 4.650866  | 1.857256  | -2.472328 |
| 6 | -2.239955 | -2.401370 | -4.933376 | 1 | 3.959548  | -0.137852 | -2.074582 |
| 1 | -0.124943 | -2.089455 | -4.700822 | 6 | 4.190735  | 3.502399  | -0.777576 |
| 6 | -3.673025 | -1.113454 | -3.485549 | 1 | 3.148601  | 2.811423  | 0.965335  |
| 1 | -2.682063 | 0.185026  | -2.082086 | 6 | 4.738887  | 3.171107  | -2.014254 |
| 6 | -3.518253 | -2.052401 | -4.506513 | 1 | 5.085766  | 1.582308  | -3.432604 |
| 1 | -2.109660 | -3.132400 | -5.729894 | 1 | 4.260557  | 4.523288  | -0.404626 |
| 1 | -4.669123 | -0.836156 | -3.142497 | 1 | 5.237678  | 3.929667  | -2.615067 |
| 1 | -4.392974 | -2.511745 | -4.963907 | 6 | 2.697642  | 0.608724  | 2.188857  |
| 6 | -3.006187 | 2.516930  | -0.523085 | 6 | 3.864540  | 0.475320  | 2.950548  |
| 6 | -2.908123 | 3.034238  | -1.823256 | 6 | 1.653190  | 1.397539  | 2.686269  |
| 6 | -4.131084 | 1.740189  | -0.197429 | 6 | 3.987087  | 1.130717  | 4.173985  |
| 6 | -3.919364 | 2.814453  | -2.756133 | 1 | 4.689671  | -0.135433 | 2.584203  |
| 1 | -2.035907 | 3.622319  | -2.107973 | 6 | 1.785330  | 2.075528  | 3.896737  |
| 6 | -5.138307 | 1.517903  | -1.132571 | 1 | 0.730526  | 1.484109  | 2.103298  |
| 1 | -4.227174 | 1.317028  | 0.803397  | 6 | 2.955417  | 1.944394  | 4.641856  |
| 6 | -5.039723 | 2.060290  | -2.413917 | 1 | 4.898602  | 1.014862  | 4.758468  |
| 1 | -3.827183 | 3.237135  | -3.756049 | 1 | 0.968922  | 2.700622  | 4.259681  |
| 1 | -6.005699 | 0.920096  | -0.856644 | 1 | 3.060030  | 2.465701  | 5.592024  |
| 1 | -5.829426 | 1.889304  | -3.143641 | 6 | 3.666568  | -1.500431 | 0.458770  |
| 6 | -0.899271 | 4.304372  | 0.374972  | 6 | 3.117032  | -2.781039 | 0.601097  |
| 6 | 0.438488  | 4.475315  | 0.755060  | 6 | 5.056217  | -1.379107 | 0.314996  |
| 6 | -1.601701 | 5.405740  | -0.131643 | 6 | 3.929490  | -3.912215 | 0.615590  |
| 6 | 1.063192  | 5.714544  | 0.631713  | 1 | 2.035167  | -2.881031 | 0.694003  |



|                 |           |          |           |    |           |          |           |
|-----------------|-----------|----------|-----------|----|-----------|----------|-----------|
| 6               | -1.864865 | 4.183951 | 7.707306  | 8  | -2.318131 | 0.870356 | -0.876159 |
| 1               | -2.271468 | 6.248715 | 8.178683  | 6  | -1.078843 | 3.684185 | -0.224394 |
| 1               | -1.495754 | 2.204770 | 6.926440  | 6  | -2.436098 | 4.012693 | -0.142218 |
| 1               | -1.715847 | 3.891831 | 8.745435  | 1  | -0.384094 | 4.404495 | -0.665700 |
| 15              | 1.270472  | 4.428924 | 2.902496  | 6  | 0.849878  | 2.167885 | 0.276376  |
| 6               | 1.545799  | 6.007426 | 3.809343  | 6  | 1.955454  | 2.516868 | -0.503165 |
| 6               | 2.236671  | 7.074582 | 3.220018  | 6  | 1.046465  | 1.784816 | 1.605835  |
| 6               | 0.937024  | 6.211483 | 5.056850  | 6  | 3.238270  | 2.468190 | 0.039134  |
| 6               | 2.318713  | 8.308882 | 3.861266  | 1  | 1.812646  | 2.814403 | -1.540825 |
| 1               | 2.716662  | 6.946384 | 2.250102  | 6  | 2.327140  | 1.745452 | 2.150917  |
| 6               | 1.021569  | 7.444798 | 5.697615  | 1  | 0.187893  | 1.520107 | 2.222362  |
| 1               | 0.400284  | 5.393477 | 5.536363  | 6  | 3.427864  | 2.085551 | 1.366521  |
| 6               | 1.710552  | 8.499973 | 5.100463  | 1  | 4.094049  | 2.734510 | -0.578925 |
| 1               | 2.862132  | 9.124769 | 3.387098  | 1  | 2.461525  | 1.452296 | 3.191835  |
| 1               | 0.546915  | 7.578912 | 6.669072  | 1  | 4.430828  | 2.055433 | 1.789486  |
| 1               | 1.776541  | 9.464544 | 5.600855  | 6  | -1.643697 | 1.209099 | -1.995603 |
| 6               | 1.530544  | 3.161339 | 4.201867  | 8  | -0.522293 | 1.889135 | -1.700387 |
| 6               | 0.798746  | 1.968364 | 4.128164  | 8  | -2.003959 | 0.932443 | -3.110063 |
| 6               | 2.418415  | 3.338863 | 5.272137  | 1  | -3.206768 | 3.244490 | -0.053060 |
| 6               | 0.967389  | 0.966268 | 5.081475  | 1  | -2.780677 | 4.972734 | -0.528834 |
| 1               | 0.072275  | 1.839160 | 3.322535  | 46 | -1.526270 | 4.347863 | 1.754393  |
| 6               | 2.580451  | 2.342815 | 6.231774  | 15 | -0.289447 | 4.873448 | 3.634356  |
| 1               | 2.980565  | 4.268426 | 5.359313  | 6  | -0.817235 | 6.504323 | 4.291448  |
| 6               | 1.861007  | 1.152262 | 6.134318  | 6  | 0.059921  | 7.454901 | 4.826756  |
| 1               | 0.388129  | 0.047040 | 5.009682  | 6  | -2.188059 | 6.797129 | 4.241596  |
| 1               | 3.273938  | 2.496299 | 7.056888  | 6  | -0.426836 | 8.668848 | 5.309280  |
| 1               | 1.988776  | 0.374865 | 6.885587  | 1  | 1.129071  | 7.246486 | 4.870066  |
| 6               | 2.800887  | 4.360537 | 1.880144  | 6  | -2.673976 | 8.005977 | 4.731452  |
| 6               | 2.719185  | 4.827332 | 0.561492  | 1  | -2.875545 | 6.066219 | 3.808418  |
| 6               | 4.042080  | 3.940044 | 2.371125  | 6  | -1.791719 | 8.945765 | 5.264679  |
| 6               | 3.853795  | 4.883737 | -0.245179 | 1  | 0.265602  | 9.400381 | 5.722391  |
| 1               | 1.752205  | 5.151570 | 0.169673  | 1  | -3.740653 | 8.219570 | 4.687897  |
| 6               | 5.173954  | 3.980874 | 1.559538  | 1  | -2.168246 | 9.895362 | 5.640609  |
| 1               | 4.130129  | 3.567796 | 3.391139  | 6  | -0.363663 | 3.803258 | 5.123867  |
| 6               | 5.084203  | 4.457182 | 0.252782  | 6  | -0.690054 | 2.450722 | 4.959259  |
| 1               | 3.773493  | 5.250276 | -1.267537 | 6  | -0.118172 | 4.285937 | 6.416800  |
| 1               | 6.130475  | 3.638432 | 1.951376  | 6  | -0.743884 | 1.593662 | 6.056101  |
| 1               | 5.969942  | 4.487460 | -0.379390 | 1  | -0.917939 | 2.074478 | 3.960296  |
|                 |           |          |           | 6  | -0.178098 | 3.430986 | 7.514049  |
|                 |           |          |           | 1  | 0.122559  | 5.339009 | 6.565542  |
| <b>L1-Pd-1a</b> |           |          |           | 6  | -0.486414 | 2.082792 | 7.335227  |
| 6               | -1.524005 | 1.217572 | 0.268291  | 1  | -0.998720 | 0.544981 | 5.911844  |
| 6               | -0.550390 | 2.267575 | -0.269877 | 1  | 0.014848  | 3.819527 | 8.512643  |
| 1               | -1.012166 | 0.314048 | 0.618914  | 1  | -0.533926 | 1.416039 | 8.194352  |
| 1               | -2.186485 | 1.595811 | 1.053015  |    |           |          |           |

|            |           |           |           |    |           |           |           |
|------------|-----------|-----------|-----------|----|-----------|-----------|-----------|
| 6          | 1.504135  | 5.107404  | 3.329346  | 6  | -2.730215 | -0.505948 | 3.658687  |
| 6          | 1.881238  | 5.569645  | 2.060143  | 1  | -0.949398 | 0.117302  | 2.619185  |
| 6          | 2.498874  | 4.859847  | 4.282820  | 6  | -3.839145 | -1.350805 | 3.643651  |
| 6          | 3.219830  | 5.801174  | 1.757835  | 1  | -4.875879 | -2.915747 | 2.582579  |
| 1          | 1.109430  | 5.739362  | 1.305787  | 1  | -2.592397 | 0.207532  | 4.469251  |
| 6          | 3.840343  | 5.080871  | 3.974619  | 1  | -4.572946 | -1.301656 | 4.446186  |
| 1          | 2.229421  | 4.491541  | 5.272335  | 6  | -1.456494 | -2.169358 | -1.242023 |
| 6          | 4.203213  | 5.555591  | 2.715993  | 6  | -1.670123 | -3.549618 | -1.369557 |
| 1          | 3.497389  | 6.155481  | 0.766095  | 6  | -1.818527 | -1.324080 | -2.299183 |
| 1          | 4.604397  | 4.883519  | 4.724765  | 6  | -2.235451 | -4.068549 | -2.530692 |
| 1          | 5.251898  | 5.725218  | 2.477611  | 1  | -1.385941 | -4.221226 | -0.559747 |
|            |           |           |           | 6  | -2.389937 | -1.844948 | -3.457732 |
| <b>TS1</b> |           |           |           | 1  | -1.639287 | -0.250417 | -2.213609 |
| 6          | -2.054312 | 2.489056  | 1.268645  | 6  | -2.595183 | -3.218059 | -3.575956 |
| 6          | -2.129111 | 1.995030  | -0.179894 | 1  | -2.393509 | -5.141771 | -2.620291 |
| 1          | -2.841701 | 1.996915  | 1.865970  | 1  | -2.665550 | -1.176448 | -4.272032 |
| 1          | -1.094237 | 2.196428  | 1.721927  | 1  | -3.031896 | -3.627794 | -4.485005 |
| 8          | -2.133605 | 3.879278  | 1.379216  | 6  | 0.465313  | -2.731663 | 0.818744  |
| 6          | -1.152178 | 2.431004  | -1.089521 | 6  | 0.525598  | -3.116644 | 2.164711  |
| 6          | 0.115612  | 2.890784  | -0.667579 | 6  | 1.373541  | -3.300026 | -0.086172 |
| 1          | -1.291856 | 2.222345  | -2.151355 | 6  | 1.479656  | -4.033783 | 2.597802  |
| 6          | -3.385846 | 1.402543  | -0.677378 | 1  | -0.168869 | -2.691526 | 2.888047  |
| 6          | -3.821502 | 1.623906  | -1.998096 | 6  | 2.329904  | -4.212721 | 0.351050  |
| 6          | -4.195902 | 0.603779  | 0.148179  | 1  | 1.328174  | -3.035053 | -1.142067 |
| 6          | -4.988373 | 1.046004  | -2.479701 | 6  | 2.391001  | -4.577131 | 1.695188  |
| 1          | -3.256067 | 2.289499  | -2.647147 | 1  | 1.510985  | -4.319383 | 3.647907  |
| 6          | -5.360716 | 0.015688  | -0.338437 | 1  | 3.027173  | -4.644292 | -0.365484 |
| 1          | -3.902472 | 0.415508  | 1.179174  | 1  | 3.139703  | -5.290198 | 2.035538  |
| 6          | -5.760739 | 0.226052  | -1.655544 | 15 | 2.306880  | 0.527448  | -0.269526 |
| 1          | -5.302902 | 1.245247  | -3.503130 | 6  | 3.111247  | -0.032152 | 1.270036  |
| 1          | -5.960458 | -0.609180 | 0.322023  | 6  | 4.508441  | -0.084668 | 1.398694  |
| 1          | -6.675538 | -0.227595 | -2.033048 | 6  | 2.315638  | -0.341425 | 2.378246  |
| 6          | -3.484181 | 4.400997  | 0.959797  | 6  | 5.087346  | -0.485536 | 2.598137  |
| 8          | -3.617999 | 4.492795  | -0.266435 | 1  | 5.144318  | 0.206187  | 0.562985  |
| 8          | -4.205609 | 4.670487  | 1.921968  | 6  | 2.897248  | -0.733605 | 3.582140  |
| 1          | 0.227255  | 3.397107  | 0.291833  | 1  | 1.230159  | -0.266458 | 2.293658  |
| 1          | 0.848445  | 3.165890  | -1.425139 | 6  | 4.282904  | -0.816182 | 3.689540  |
| 46         | 0.006296  | 0.810046  | -0.166226 | 1  | 6.171321  | -0.529301 | 2.685089  |
| 15         | -0.701982 | -1.435159 | 0.250670  | 1  | 2.264035  | -0.976896 | 4.434015  |
| 6          | -1.975085 | -1.459741 | 1.558885  | 1  | 4.739500  | -1.125380 | 4.628070  |
| 6          | -3.082269 | -2.315533 | 1.558745  | 6  | 2.685078  | -0.672008 | -1.593393 |
| 6          | -1.806511 | -0.559861 | 2.619131  | 6  | 1.765824  | -0.775876 | -2.647185 |
| 6          | -4.009536 | -2.256481 | 2.597086  | 6  | 3.813023  | -1.499652 | -1.588911 |
| 1          | -3.234055 | -3.016808 | 0.738467  | 6  | 1.960881  | -1.702911 | -3.667752 |



|            |           |           |           |    |           |           |           |
|------------|-----------|-----------|-----------|----|-----------|-----------|-----------|
| 1          | 0.880163  | -0.136640 | -2.646969 | 6  | -0.941721 | 2.391607  | 0.548791  |
| 6          | 4.006951  | -2.425472 | -2.610952 | 6  | -0.965136 | 3.728570  | 0.134232  |
| 1          | 4.532006  | -1.446316 | -0.772863 | 6  | -0.704829 | 2.107506  | 1.901142  |
| 6          | 3.080182  | -2.534394 | -3.646723 | 6  | -0.753136 | 4.753263  | 1.054183  |
| 1          | 1.232111  | -1.782165 | -4.473137 | 1  | -1.123416 | 3.978552  | -0.913182 |
| 1          | 4.881585  | -3.073245 | -2.590239 | 6  | -0.497646 | 3.131687  | 2.821241  |
| 1          | 3.228978  | -3.268549 | -4.436354 | 1  | -0.657963 | 1.066082  | 2.224587  |
| 6          | 3.292638  | 2.005894  | -0.698318 | 6  | -0.518884 | 4.458971  | 2.396910  |
| 6          | 3.432066  | 3.015206  | 0.266433  | 1  | -0.762598 | 5.788108  | 0.716332  |
| 6          | 3.852231  | 2.190218  | -1.966614 | 1  | -0.305478 | 2.889485  | 3.865457  |
| 6          | 4.130657  | 4.179856  | -0.030782 | 1  | -0.347923 | 5.263437  | 3.110022  |
| 6          | 4.549836  | 3.361264  | -2.261060 | 15 | 2.161615  | -0.126387 | 0.468750  |
| 1          | 3.751507  | 1.417540  | -2.727826 | 6  | 2.732287  | 1.306264  | -0.514958 |
| 6          | 4.692817  | 4.355063  | -1.296331 | 6  | 3.495363  | 1.138746  | -1.676914 |
| 1          | 4.237385  | 4.953255  | 0.727776  | 6  | 2.322239  | 2.598243  | -0.153436 |
| 1          | 4.987534  | 3.491506  | -3.249169 | 6  | 3.834346  | 2.237950  | -2.462485 |
| 1          | 5.240841  | 5.266465  | -1.528094 | 1  | 3.822716  | 0.144963  | -1.979855 |
| 1          | 2.989247  | 2.885787  | 1.255230  | 6  | 2.656450  | 3.693362  | -0.945165 |
|            |           |           |           | 1  | 1.749130  | 2.750457  | 0.760754  |
|            |           |           |           | 6  | 3.408687  | 3.515388  | -2.105489 |
|            |           |           |           | 1  | 4.428589  | 2.089852  | -3.362711 |
|            |           |           |           | 1  | 2.329566  | 4.689323  | -0.649275 |
|            |           |           |           | 1  | 3.669657  | 4.372191  | -2.723973 |
|            |           |           |           | 6  | 2.537814  | 0.355470  | 2.189865  |
|            |           |           |           | 6  | 1.718304  | -0.104128 | 3.228751  |
|            |           |           |           | 6  | 3.639015  | 1.166769  | 2.499266  |
|            |           |           |           | 6  | 1.991120  | 0.240945  | 4.550377  |
|            |           |           |           | 1  | 0.848590  | -0.719196 | 2.990099  |
|            |           |           |           | 6  | 3.908962  | 1.511825  | 3.820647  |
|            |           |           |           | 1  | 4.286149  | 1.531095  | 1.701676  |
|            |           |           |           | 6  | 3.084823  | 1.052200  | 4.847114  |
|            |           |           |           | 1  | 1.341513  | -0.116594 | 5.347445  |
|            |           |           |           | 1  | 4.766397  | 2.142168  | 4.049112  |
|            |           |           |           | 1  | 3.294782  | 1.328812  | 5.878704  |
|            |           |           |           | 6  | 3.347308  | -1.449726 | 0.040194  |
|            |           |           |           | 6  | 3.047702  | -2.219155 | -1.092891 |
|            |           |           |           | 6  | 4.488471  | -1.746858 | 0.792034  |
|            |           |           |           | 6  | 3.881107  | -3.266346 | -1.471398 |
|            |           |           |           | 1  | 2.146695  | -2.013667 | -1.678215 |
|            |           |           |           | 6  | 5.313712  | -2.806521 | 0.415487  |
|            |           |           |           | 1  | 4.731243  | -1.162009 | 1.678809  |
|            |           |           |           | 6  | 5.013123  | -3.566243 | -0.713489 |
|            |           |           |           | 1  | 3.633864  | -3.857317 | -2.352313 |
|            |           |           |           | 1  | 6.194172  | -3.039835 | 1.011866  |
| <b>IM2</b> |           |           |           |    |           |           |           |
| 46         | -0.014917 | -0.929659 | 0.294898  |    |           |           |           |
| 15         | -1.153702 | 0.951688  | -0.560779 |    |           |           |           |
| 6          | -0.636231 | 1.432254  | -2.245920 |    |           |           |           |
| 6          | -1.307884 | 2.436293  | -2.962618 |    |           |           |           |
| 6          | 0.393143  | 0.722468  | -2.872490 |    |           |           |           |
| 6          | -0.919855 | 2.754333  | -4.259146 |    |           |           |           |
| 1          | -2.156202 | 2.953458  | -2.514894 |    |           |           |           |
| 6          | 0.770132  | 1.033540  | -4.178616 |    |           |           |           |
| 1          | 0.873170  | -0.106284 | -2.350181 |    |           |           |           |
| 6          | 0.124399  | 2.056673  | -4.867803 |    |           |           |           |
| 1          | -1.444284 | 3.538425  | -4.802330 |    |           |           |           |
| 1          | 1.568529  | 0.466750  | -4.656114 |    |           |           |           |
| 1          | 0.420150  | 2.300410  | -5.886820 |    |           |           |           |
| 6          | -2.965060 | 0.808575  | -0.787576 |    |           |           |           |
| 6          | -3.888797 | 1.488069  | 0.012767  |    |           |           |           |
| 6          | -3.433159 | -0.043686 | -1.800532 |    |           |           |           |
| 6          | -5.257365 | 1.331175  | -0.206871 |    |           |           |           |
| 1          | -3.544184 | 2.149041  | 0.807775  |    |           |           |           |
| 6          | -4.798977 | -0.194103 | -2.016944 |    |           |           |           |
| 1          | -2.721218 | -0.595574 | -2.415411 |    |           |           |           |
| 6          | -5.715129 | 0.495915  | -1.222485 |    |           |           |           |
| 1          | -5.966444 | 1.866311  | 0.423243  |    |           |           |           |
| 1          | -5.148560 | -0.855237 | -2.808524 |    |           |           |           |
| 1          | -6.783967 | 0.376278  | -1.391455 |    |           |           |           |



|             |           |           |           |    |           |           |           |
|-------------|-----------|-----------|-----------|----|-----------|-----------|-----------|
| 6           | 3.975520  | -4.678549 | -0.772975 | 1  | 1.563980  | 6.259697  | 1.109252  |
| 1           | 2.467742  | -3.259227 | -1.359686 | 1  | 3.502746  | 3.801236  | -1.844066 |
| 6           | 5.453017  | -3.994634 | 1.008411  | 1  | 3.333270  | 5.953779  | -0.610180 |
| 1           | 5.129874  | -2.022954 | 1.811546  | 6  | -1.924050 | 2.362373  | 0.497580  |
| 6           | 5.041321  | -4.952625 | 0.083863  | 6  | -2.971651 | 1.623737  | 1.064920  |
| 1           | 3.643934  | -5.422183 | -1.496561 | 6  | -2.226763 | 3.533188  | -0.205260 |
| 1           | 6.284949  | -4.204339 | 1.678626  | 6  | -4.289941 | 2.044203  | 0.934195  |
| 1           | 5.549312  | -5.914220 | 0.033248  | 1  | -2.756304 | 0.692781  | 1.591587  |
| 6           | -1.826200 | -3.115668 | -0.606963 | 6  | -3.549636 | 3.956247  | -0.332903 |
| 6           | -1.601506 | -2.344499 | 0.683179  | 1  | -1.431284 | 4.113890  | -0.669748 |
| 1           | -1.848006 | -4.197242 | -0.417329 | 6  | -4.583639 | 3.213709  | 0.230885  |
| 1           | -2.786758 | -2.817899 | -1.044414 | 1  | -5.091133 | 1.448379  | 1.370552  |
| 8           | -0.824882 | -2.855731 | -1.583674 | 1  | -3.769399 | 4.868954  | -0.884814 |
| 6           | -0.541984 | -2.654934 | 1.566828  | 1  | -5.615894 | 3.542290  | 0.122851  |
| 6           | 0.674920  | -3.238298 | 1.165490  | 6  | 0.003666  | 1.176288  | 2.276795  |
| 1           | -0.589029 | -2.223720 | 2.568713  | 6  | 0.631997  | 1.986014  | 3.230131  |
| 6           | -2.710724 | -1.538361 | 1.242311  | 6  | -0.408831 | -0.111043 | 2.656018  |
| 6           | -2.450634 | -0.502146 | 2.160577  | 6  | 0.846146  | 1.519121  | 4.524822  |
| 6           | -4.054508 | -1.807321 | 0.933374  | 1  | 0.989625  | 2.977469  | 2.959921  |
| 6           | -3.479428 | 0.212196  | 2.759956  | 6  | -0.199004 | -0.575907 | 3.951767  |
| 1           | -1.414598 | -0.240553 | 2.383917  | 1  | -0.881469 | -0.760460 | 1.915072  |
| 6           | -5.087568 | -1.091856 | 1.536303  | 6  | 0.435597  | 0.237824  | 4.888946  |
| 1           | -4.307378 | -2.610231 | 0.243484  | 1  | 1.346825  | 2.159333  | 5.249658  |
| 6           | -4.809118 | -0.082584 | 2.453935  | 1  | -0.521250 | -1.579954 | 4.224688  |
| 1           | -3.242086 | 1.014765  | 3.457093  | 1  | 0.613254  | -0.127019 | 5.899135  |
| 1           | -6.119304 | -1.332648 | 1.284851  | 15 | 1.858538  | -1.202589 | -0.258967 |
| 1           | -5.618294 | 0.476638  | 2.920085  | 6  | 3.176344  | -0.080119 | 0.343600  |
| 6           | 0.023583  | -3.966092 | -2.002945 | 6  | 4.167958  | 0.419688  | -0.510520 |
| 8           | -0.176008 | -5.058883 | -1.450622 | 6  | 3.154794  | 0.347756  | 1.679011  |
| 8           | 0.838248  | -3.596638 | -2.862333 | 6  | 5.109587  | 1.332101  | -0.040117 |
| 1           | 0.708965  | -3.936752 | 0.327081  | 1  | 4.205329  | 0.101474  | -1.551684 |
| 1           | 1.458175  | -3.366862 | 1.912809  | 6  | 4.091714  | 1.266435  | 2.143998  |
|             |           |           |           | 1  | 2.408663  | -0.054034 | 2.363919  |
|             |           |           |           | 6  | 5.069234  | 1.764629  | 1.283821  |
|             |           |           |           | 1  | 5.874101  | 1.710770  | -0.716710 |
|             |           |           |           | 1  | 4.059726  | 1.587373  | 3.184158  |
|             |           |           |           | 1  | 5.802666  | 2.482050  | 1.647598  |
|             |           |           |           | 6  | 1.818852  | -2.510042 | 1.020045  |
|             |           |           |           | 6  | 0.601505  | -3.147312 | 1.286581  |
|             |           |           |           | 6  | 2.955963  | -2.890854 | 1.747683  |
|             |           |           |           | 6  | 0.517075  | -4.153332 | 2.245061  |
|             |           |           |           | 1  | -0.289719 | -2.828228 | 0.748748  |
|             |           |           |           | 6  | 2.868452  | -3.888106 | 2.715804  |
|             |           |           |           | 1  | 3.911738  | -2.401291 | 1.563150  |
| <b>TS2a</b> |           |           |           |    |           |           |           |
| 46          | -0.170542 | -0.353113 | -0.823576 |    |           |           |           |
| 15          | -0.239849 | 1.642783  | 0.516176  |    |           |           |           |
| 6           | 0.872095  | 3.049396  | 0.190011  |    |           |           |           |
| 6           | 0.768209  | 4.277070  | 0.863157  |    |           |           |           |
| 6           | 1.856070  | 2.897110  | -0.793560 |    |           |           |           |
| 6           | 1.652741  | 5.313061  | 0.579040  |    |           |           |           |
| 1           | -0.016979 | 4.426143  | 1.603982  |    |           |           |           |
| 6           | 2.739334  | 3.935812  | -1.079338 |    |           |           |           |
| 1           | 1.918136  | 1.957769  | -1.343661 |    |           |           |           |
| 6           | 2.643148  | 5.141457  | -0.388421 |    |           |           |           |



|   |           |           |           |             |           |           |           |
|---|-----------|-----------|-----------|-------------|-----------|-----------|-----------|
| 6 | -1.048986 | 1.495848  | 1.671196  | <b>TS2b</b> |           |           |           |
| 6 | 0.300364  | 1.364915  | 2.031776  | 46          | 0.157292  | -0.776787 | -0.887043 |
| 6 | -2.009390 | 1.617186  | 2.681466  | 15          | 1.294487  | 0.918559  | 0.298339  |
| 6 | 0.682375  | 1.355437  | 3.370928  | 6           | 0.614801  | 0.925002  | 1.999268  |
| 1 | 1.052048  | 1.252061  | 1.246778  | 6           | 0.419119  | 2.066231  | 2.783264  |
| 6 | -1.627881 | 1.599531  | 4.021112  | 6           | 0.316276  | -0.333972 | 2.545338  |
| 1 | -3.065609 | 1.698537  | 2.431114  | 6           | -0.064974 | 1.948068  | 4.085298  |
| 6 | -0.284043 | 1.469553  | 4.369377  | 1           | 0.625732  | 3.055553  | 2.379516  |
| 1 | 1.735840  | 1.254260  | 3.631115  | 6           | -0.152140 | -0.450433 | 3.851126  |
| 1 | -2.387392 | 1.682734  | 4.796878  | 1           | 0.458926  | -1.230060 | 1.935536  |
| 1 | 0.008381  | 1.453736  | 5.417685  | 6           | -0.344419 | 0.693331  | 4.624525  |
| 6 | -1.568245 | 3.277782  | -0.511330 | 1           | -0.229020 | 2.846255  | 4.678850  |
| 6 | -2.327615 | 3.689506  | -1.615801 | 1           | -0.373824 | -1.437374 | 4.256256  |
| 6 | -0.822870 | 4.231595  | 0.191874  | 1           | -0.720607 | 0.609099  | 5.642655  |
| 6 | -2.351781 | 5.027894  | -1.996739 | 6           | 3.103436  | 0.891075  | 0.599846  |
| 1 | -2.904223 | 2.958480  | -2.183200 | 6           | 3.975907  | 1.478969  | -0.326903 |
| 6 | -0.845529 | 5.570431  | -0.194606 | 6           | 3.643984  | 0.235257  | 1.715482  |
| 1 | -0.218142 | 3.930185  | 1.047385  | 6           | 5.353068  | 1.436045  | -0.126638 |
| 6 | -1.610143 | 5.972429  | -1.287571 | 1           | 3.576892  | 1.980454  | -1.208686 |
| 1 | -2.951777 | 5.332718  | -2.852432 | 6           | 5.022052  | 0.192492  | 1.910450  |
| 1 | -0.265286 | 6.301688  | 0.365787  | 1           | 2.985930  | -0.237393 | 2.444327  |
| 1 | -1.629071 | 7.018767  | -1.586428 | 6           | 5.880284  | 0.796696  | 0.993571  |
| 6 | 2.965203  | 0.002653  | -2.334082 | 1           | 6.016023  | 1.899621  | -0.855700 |
| 6 | 3.184677  | 1.218578  | -1.450539 | 1           | 5.424474  | -0.312286 | 2.787181  |
| 1 | 3.011873  | 0.342855  | -3.395354 | 1           | 6.957390  | 0.764287  | 1.148368  |
| 1 | 3.818532  | -0.691883 | -2.208489 | 6           | 1.045248  | 2.547642  | -0.488267 |
| 8 | 1.777351  | -0.690580 | -2.100305 | 6           | 1.503459  | 3.757326  | 0.054721  |
| 6 | 2.175923  | 2.134428  | -1.426225 | 6           | 0.410982  | 2.566468  | -1.737484 |
| 6 | 0.953823  | 1.988185  | -2.200980 | 6           | 1.270247  | 4.957888  | -0.610295 |
| 1 | 2.246203  | 2.992897  | -0.751103 | 1           | 2.059082  | 3.761855  | 0.991671  |
| 6 | 4.377189  | 1.335575  | -0.611742 | 6           | 0.190345  | 3.766036  | -2.409794 |
| 6 | 5.609751  | 0.776596  | -1.004444 | 1           | 0.078115  | 1.623863  | -2.177168 |
| 6 | 4.333245  | 1.981907  | 0.642707  | 6           | 0.607642  | 4.965704  | -1.838491 |
| 6 | 6.736191  | 0.864031  | -0.191934 | 1           | 1.619993  | 5.891752  | -0.173974 |
| 1 | 5.691162  | 0.288869  | -1.974953 | 1           | -0.312396 | 3.759209  | -3.376291 |
| 6 | 5.459213  | 2.068902  | 1.452275  | 1           | 0.431512  | 5.907632  | -2.355184 |
| 1 | 3.387288  | 2.393749  | 0.996073  | 15          | -2.052332 | -0.055822 | -0.604960 |
| 6 | 6.671420  | 1.510117  | 1.041635  | 6           | -2.531368 | 1.257689  | 0.581222  |
| 1 | 7.675948  | 0.430192  | -0.531483 | 6           | -3.022990 | 0.949400  | 1.856333  |
| 1 | 5.386910  | 2.564238  | 2.420114  | 6           | -2.358318 | 2.606345  | 0.234069  |
| 1 | 7.552097  | 1.573756  | 1.678220  | 6           | -3.334864 | 1.964909  | 2.758096  |
| 1 | 1.093799  | 1.566715  | -3.204737 | 1           | -3.168880 | -0.088688 | 2.152183  |
| 1 | 0.315617  | 2.874543  | -2.228155 | 6           | -2.665748 | 3.618125  | 1.139042  |
|   |           |           |           | 1           | -1.998362 | 2.870551  | -0.759030 |

|   |           |           |           |             |           |           |           |
|---|-----------|-----------|-----------|-------------|-----------|-----------|-----------|
| 6 | -3.155309 | 3.300665  | 2.405157  | 1           | 6.872237  | -0.992399 | -2.827775 |
| 1 | -3.717327 | 1.705119  | 3.744123  | 6           | 1.471235  | -4.152569 | 2.757449  |
| 1 | -2.524325 | 4.658151  | 0.847639  | 8           | 2.483560  | -3.718107 | 3.157824  |
| 1 | -3.395844 | 4.091576  | 3.113587  | 8           | 0.398562  | -4.570244 | 2.533789  |
| 6 | -2.757477 | 0.537766  | -2.183652 | 1           | -0.728840 | -3.223288 | -0.928023 |
| 6 | -2.057704 | 0.295101  | -3.373161 | 1           | -1.201515 | -2.625956 | -2.599532 |
| 6 | -3.970652 | 1.240173  | -2.241300 |             |           |           |           |
| 6 | -2.560284 | 0.738790  | -4.594503 |             |           |           |           |
| 1 | -1.102544 | -0.232947 | -3.332831 | <b>IM4b</b> |           |           |           |
| 6 | -4.472722 | 1.679693  | -3.462706 | 46          | 0.189173  | 0.312214  | -1.173398 |
| 1 | -4.522390 | 1.450581  | -1.325290 | 15          | -0.088860 | -1.819184 | -0.096697 |
| 6 | -3.769339 | 1.429521  | -4.640481 | 6           | 0.024798  | -3.138237 | -1.357619 |
| 1 | -2.002903 | 0.547288  | -5.509673 | 6           | 0.407514  | -4.448048 | -1.047760 |
| 1 | -5.415704 | 2.222658  | -3.493532 | 6           | -0.350780 | -2.827875 | -2.670315 |
| 1 | -4.160807 | 1.780860  | -5.593393 | 6           | 0.413570  | -5.430493 | -2.035504 |
| 6 | -3.085150 | -1.473844 | -0.077322 | 1           | 0.701483  | -4.706542 | -0.030267 |
| 6 | -2.535485 | -2.387284 | 0.834741  | 6           | -0.352172 | -3.812574 | -3.655127 |
| 6 | -4.393919 | -1.669870 | -0.530491 | 1           | -0.622385 | -1.799176 | -2.916068 |
| 6 | -3.285595 | -3.466594 | 1.292764  | 6           | 0.030848  | -5.115087 | -3.338536 |
| 1 | -1.503262 | -2.256625 | 1.172682  | 1           | 0.715789  | -6.445947 | -1.784675 |
| 6 | -5.138298 | -2.758539 | -0.081009 | 1           | -0.643457 | -3.559700 | -4.673239 |
| 1 | -4.836753 | -0.975853 | -1.243094 | 1           | 0.035182  | -5.884757 | -4.108754 |
| 6 | -4.588417 | -3.655314 | 0.832749  | 6           | 1.261622  | -2.131990 | 1.103260  |
| 1 | -2.846330 | -4.167670 | 2.000381  | 6           | 1.153625  | -3.119991 | 2.092498  |
| 1 | -6.152792 | -2.904331 | -0.448093 | 6           | 2.419639  | -1.343817 | 1.055820  |
| 1 | -5.172183 | -4.505578 | 1.180800  | 6           | 2.181696  | -3.314958 | 3.010983  |
| 6 | 1.798994  | -2.903198 | 0.229100  | 1           | 0.255969  | -3.734536 | 2.152848  |
| 6 | 1.922617  | -2.307768 | -1.175795 | 6           | 3.449401  | -1.543973 | 1.972704  |
| 1 | 2.360836  | -2.183681 | 0.899000  | 1           | 2.499246  | -0.567343 | 0.293102  |
| 1 | 0.726981  | -2.767162 | 0.556077  | 6           | 3.329781  | -2.526528 | 2.954421  |
| 8 | 2.232871  | -4.164413 | 0.262567  | 1           | 2.082371  | -4.083937 | 3.775150  |
| 6 | 0.897936  | -2.431221 | -2.141880 | 1           | 4.342451  | -0.921605 | 1.927082  |
| 6 | -0.457589 | -2.630585 | -1.802270 | 1           | 4.129436  | -2.675986 | 3.678013  |
| 1 | 1.132506  | -2.173919 | -3.178269 | 6           | -1.578465 | -2.304605 | 0.855210  |
| 6 | 3.271296  | -1.917720 | -1.627180 | 6           | -2.557589 | -3.153327 | 0.322879  |
| 6 | 3.471515  | -1.048377 | -2.715312 | 6           | -1.800539 | -1.728410 | 2.115357  |
| 6 | 4.404607  | -2.413349 | -0.958123 | 6           | -3.732049 | -3.410642 | 1.027309  |
| 6 | 4.753502  | -0.722948 | -3.145652 | 1           | -2.410252 | -3.612003 | -0.654622 |
| 1 | 2.609088  | -0.598322 | -3.210939 | 6           | -2.980518 | -1.974654 | 2.810406  |
| 6 | 5.685592  | -2.083611 | -1.389906 | 1           | -1.038258 | -1.089279 | 2.560684  |
| 1 | 4.243971  | -3.115804 | -0.139825 | 6           | -3.952324 | -2.814997 | 2.267264  |
| 6 | 5.868292  | -1.247040 | -2.491180 | 1           | -4.480115 | -4.076196 | 0.599167  |
| 1 | 4.883033  | -0.042897 | -3.986770 | 1           | -3.135345 | -1.515315 | 3.785875  |
| 1 | 6.549846  | -2.489940 | -0.865223 | 1           | -4.873413 | -3.011204 | 2.813563  |
|   |           |           |           | 15          | -1.430583 | 1.491792  | -0.123209 |

|   |           |           |           |                 |           |          |           |
|---|-----------|-----------|-----------|-----------------|-----------|----------|-----------|
| 6 | -3.153313 | 0.919398  | -0.332960 | 6               | 6.736191  | 0.864031 | -0.191934 |
| 6 | -4.248142 | 1.641289  | 0.168507  | 1               | 5.691162  | 0.288869 | -1.974953 |
| 6 | -3.392691 | -0.239390 | -1.079548 | 6               | 5.459213  | 2.068902 | 1.452275  |
| 6 | -5.546260 | 1.188569  | -0.042963 | 1               | 3.387288  | 2.393749 | 0.996073  |
| 1 | -4.084642 | 2.575021  | 0.706031  | 6               | 6.671420  | 1.510117 | 1.041635  |
| 6 | -4.693846 | -0.688929 | -1.296012 | 1               | 7.675948  | 0.430192 | -0.531483 |
| 1 | -2.546227 | -0.783215 | -1.503662 | 1               | 5.386910  | 2.564238 | 2.420114  |
| 6 | -5.771247 | 0.020020  | -0.771369 | 1               | 7.552097  | 1.573756 | 1.678220  |
| 1 | -6.386397 | 1.755715  | 0.354054  | 1               | 1.093799  | 1.566715 | -3.204737 |
| 1 | -4.862806 | -1.595258 | -1.875770 | 1               | 0.315617  | 2.874543 | -2.228155 |
| 1 | -6.788705 | -0.329122 | -0.939156 |                 |           |          |           |
| 6 | -1.048986 | 1.495848  | 1.671196  | CO <sub>2</sub> |           |          |           |
| 6 | 0.300364  | 1.364915  | 2.031776  | 6               | 0.000000  | 0.000000 | 0.000000  |
| 6 | -2.009390 | 1.617186  | 2.681466  | 8               | 0.000000  | 0.000000 | 1.168264  |
| 6 | 0.682375  | 1.355437  | 3.370928  | 8               | 0.000000  | 0.000000 | -1.168264 |
| 1 | 1.052048  | 1.252061  | 1.246778  |                 |           |          |           |
| 6 | -1.627881 | 1.599531  | 4.021112  | <b>1-IM5-O</b>  |           |          |           |
| 1 | -3.065609 | 1.698537  | 2.431114  | 46              | -5.786738 | 7.199509 | 7.016819  |
| 6 | -0.284043 | 1.469553  | 4.369377  | 15              | -5.769826 | 7.409111 | 9.251963  |
| 1 | 1.735840  | 1.254260  | 3.631115  | 6               | -6.070887 | 5.846873 | 10.160964 |
| 1 | -2.387392 | 1.682734  | 4.796878  | 6               | -5.355568 | 5.486484 | 11.308823 |
| 1 | 0.008381  | 1.453736  | 5.417685  | 6               | -7.067084 | 4.984004 | 9.681143  |
| 6 | -1.568245 | 3.277782  | -0.511330 | 6               | -5.639598 | 4.294122 | 11.970635 |
| 6 | -2.327615 | 3.689506  | -1.615801 | 1               | -4.569681 | 6.135941 | 11.690882 |
| 6 | -0.822870 | 4.231595  | 0.191874  | 6               | -7.358840 | 3.799995 | 10.353023 |
| 6 | -2.351781 | 5.027894  | -1.996739 | 1               | -7.608847 | 5.243166 | 8.770933  |
| 1 | -2.904223 | 2.958480  | -2.183200 | 6               | -6.643782 | 3.452095 | 11.498190 |
| 6 | -0.845529 | 5.570431  | -0.194606 | 1               | -5.072528 | 4.024390 | 12.859943 |
| 1 | -0.218142 | 3.930185  | 1.047385  | 1               | -8.139122 | 3.142280 | 9.973658  |
| 6 | -1.610143 | 5.972429  | -1.287571 | 1               | -6.865536 | 2.521627 | 12.018236 |
| 1 | -2.951777 | 5.332718  | -2.852432 | 6               | -4.139819 | 8.002913 | 9.833526  |
| 1 | -0.265286 | 6.301688  | 0.365787  | 6               | -3.941675 | 8.541283 | 11.113629 |
| 1 | -1.629071 | 7.018767  | -1.586428 | 6               | -3.046056 | 7.902187 | 8.964060  |
| 6 | 2.965203  | 0.002653  | -2.334082 | 6               | -2.677459 | 8.966475 | 11.511471 |
| 6 | 3.184677  | 1.218578  | -1.450539 | 1               | -4.782548 | 8.632028 | 11.801201 |
| 1 | 3.011873  | 0.342855  | -3.395354 | 6               | -1.780991 | 8.328097 | 9.363621  |
| 1 | 3.818532  | -0.691883 | -2.208489 | 1               | -3.199568 | 7.493562 | 7.962791  |
| 8 | 1.777351  | -0.690580 | -2.100305 | 6               | -1.596016 | 8.862539 | 10.636928 |
| 6 | 2.175923  | 2.134428  | -1.426225 | 1               | -2.537064 | 9.383214 | 12.507246 |
| 6 | 0.953823  | 1.988185  | -2.200980 | 1               | -0.941660 | 8.249994 | 8.673736  |
| 1 | 2.246203  | 2.992897  | -0.751103 | 1               | -0.609461 | 9.201045 | 10.948983 |
| 6 | 4.377189  | 1.335575  | -0.611742 | 6               | -6.957201 | 8.584906 | 10.008943 |
| 6 | 5.609751  | 0.776596  | -1.004444 | 6               | -8.233861 | 8.160737 | 10.401400 |
| 6 | 4.333245  | 1.981907  | 0.642707  | 6               | -6.642643 | 9.949173 | 10.103255 |

|              |           |           |                |           |          |
|--------------|-----------|-----------|----------------|-----------|----------|
| 6 -9.166713  | 9.074579  | 10.884785 | 1 -7.113158    | 3.454836  | 5.301603 |
| 1 -8.502819  | 7.106725  | 10.338400 | 6 -1.639024    | 5.449593  | 4.641034 |
| 6 -7.577340  | 10.860376 | 10.588266 | 6 -1.051992    | 6.295074  | 5.599981 |
| 1 -5.654531  | 10.301833 | 9.809077  | 6 -0.901964    | 5.091410  | 3.501325 |
| 6 -8.841992  | 10.426528 | 10.980403 | 6 0.241631     | 6.761973  | 5.421021 |
| 1 10.150308  | 8.724849  | 11.194104 | 1 -1.630920    | 6.581205  | 6.475920 |
| 1 -7.311658  | 11.913600 | 10.661920 | 6 0.390828     | 5.566567  | 3.325517 |
| 1 -9.570577  | 11.138824 | 11.363063 | 1 -1.337224    | 4.440506  | 2.743379 |
| 6 -4.793370  | 7.771888  | 4.222786  | 6 0.966116     | 6.400804  | 4.283951 |
| 6 -4.064431  | 8.912472  | 4.900526  | 1 0.686385     | 7.419890  | 6.165489 |
| 1 -5.228411  | 8.175482  | 3.280279  | 1 0.952349     | 5.285485  | 2.437346 |
| 1 -4.003029  | 7.067765  | 3.861707  | 1 1.978029     | 6.775674  | 4.141750 |
| 8 -5.774844  | 7.117806  | 4.921698  | 17 -8.629949   | -0.300301 | 0.245154 |
| 6 -4.559625  | 9.507129  | 6.017543  | 1 -6.710968    | 9.258890  | 6.026379 |
| 6 -5.830598  | 9.216304  | 6.679664  | 1 -5.997608    | 9.832584  | 7.568358 |
| 1 -3.941827  | 10.270546 | 6.497992  |                |           |          |
| 6 -2.786891  | 9.335778  | 4.304154  | <b>1-TS5-O</b> |           |          |
| 6 -2.500949  | 9.072160  | 2.949704  | 46 -4.855395   | 6.900285  | 6.859379 |
| 6 -1.787986  | 9.986976  | 5.055401  | 15 -7.003420   | 6.741851  | 6.070769 |
| 6 -1.293279  | 9.457978  | 2.374763  | 6 -6.964057    | 6.433700  | 4.265563 |
| 1 -3.244448  | 8.578261  | 2.326261  | 6 -8.075664    | 5.988240  | 3.538327 |
| 6 -0.584279  | 10.374647 | 4.479854  | 6 -5.781079    | 6.750763  | 3.583597 |
| 1 -1.948597  | 10.171543 | 6.117197  | 6 -8.010136    | 5.881077  | 2.151535 |
| 6 -0.327031  | 10.115481 | 3.132834  | 1 -8.998387    | 5.720442  | 4.051216 |
| 1 -1.110023  | 9.244766  | 1.322359  | 6 -5.722479    | 6.645381  | 2.194757 |
| 1 0.167136   | 10.870797 | 5.093174  | 1 -4.895264    | 7.061924  | 4.145547 |
| 1 0.617826   | 10.416636 | 2.683631  | 6 -6.837311    | 6.218675  | 1.476253 |
| 6 -2.999390  | 4.982739  | 4.855682  | 1 -8.878506    | 5.527756  | 1.596662 |
| 6 -5.199443  | 3.861781  | 4.700768  | 1 -4.796260    | 6.889173  | 1.675584 |
| 6 -4.970813  | 4.738357  | 5.868973  | 1 -6.789502    | 6.132175  | 0.391843 |
| 7 -3.712051  | 5.306320  | 5.895224  | 6 -8.155358    | 5.533494  | 6.816276 |
| 8 -5.816689  | 4.929385  | 6.761615  | 6 -9.536009    | 5.587163  | 6.567998 |
| 16 -3.775822 | 3.888654  | 3.680821  | 6 -7.654265    | 4.544773  | 7.672111 |
| 6 -6.389873  | 3.237500  | 4.512795  | 6-10.388558    | 4.643522  | 7.133051 |
| 6 -6.867149  | 2.375422  | 3.459834  | 1 -9.948677    | 6.377001  | 5.940629 |
| 6 -6.060793  | 1.845989  | 2.433128  | 6 -8.513271    | 3.606394  | 8.242471 |
| 6 -8.235442  | 2.034547  | 3.464340  | 1 -6.585801    | 4.512303  | 7.885085 |
| 6 -6.594640  | 1.026709  | 1.450829  | 6 -9.878084    | 3.649076  | 7.967436 |
| 1 -4.992504  | 2.046713  | 2.401057  | 1-11.456490    | 4.690789  | 6.927382 |
| 6 -8.786210  | 1.223347  | 2.485188  | 1 -8.112652    | 2.843123  | 8.907452 |
| 1 -8.874585  | 2.426047  | 4.254378  | 1-10.548479    | 2.915449  | 8.411699 |
| 6 -7.955755  | 0.727415  | 1.482676  | 6 -7.944098    | 8.308708  | 6.196945 |
| 1 -5.959574  | 0.618128  | 0.669386  | 6 -8.022559    | 9.205784  | 5.126049 |
| 1 -9.843853  | 0.974846  | 2.498762  | 6 -8.496299    | 8.674471  | 7.433389 |



|              |           |           |                |          |           |
|--------------|-----------|-----------|----------------|----------|-----------|
| 6 -8.648689  | 10.441189 | 5.286570  | 1 -5.898033    | 3.437787 | 6.066003  |
| 1 -7.592371  | 8.943951  | 4.159677  | 6 -0.575184    | 5.598588 | 4.997327  |
| 6 -9.124222  | 9.906549  | 7.588551  | 6 0.385271     | 5.638423 | 6.018165  |
| 1 -8.432431  | 7.990522  | 8.280723  | 6 -0.201020    | 5.956198 | 3.693888  |
| 6 -9.200023  | 10.794728 | 6.515452  | 6 1.695388     | 6.013909 | 5.736153  |
| 1 -8.704756  | 11.127948 | 4.443643  | 1 0.091204     | 5.363828 | 7.028774  |
| 1 -9.552988  | 10.175316 | 8.552602  | 6 1.106600     | 6.329623 | 3.415922  |
| 1 -9.688334  | 11.759678 | 6.638854  | 1 -0.945347    | 5.962253 | 2.897536  |
| 6 -2.137616  | 8.118484  | 6.008587  | 6 2.059588     | 6.359744 | 4.436965  |
| 6 -2.610006  | 8.119723  | 7.464497  | 1 2.432136     | 6.039749 | 6.537857  |
| 1 -2.241158  | 9.157530  | 5.623380  | 1 1.385246     | 6.605352 | 2.400791  |
| 1 -1.045262  | 7.919323  | 5.994413  | 1 3.083903     | 6.654534 | 4.216261  |
| 8 -2.817168  | 7.229136  | 5.209434  | 17 -8.653133   | 1.544846 | 0.513289  |
| 6 -3.843572  | 8.674403  | 7.782341  | 1 -4.512441    | 9.222348 | 5.770627  |
| 6 -4.828248  | 8.963262  | 6.784937  | 1 -5.747742    | 9.452694 | 7.106669  |
| 1 -4.133061  | 8.757180  | 8.831498  |                |          |           |
| 6 -1.741841  | 7.634640  | 8.543058  | <b>1-IM6-O</b> |          |           |
| 6 -0.347418  | 7.808170  | 8.496116  | 46 -5.181977   | 7.217693 | 5.503304  |
| 6 -2.290043  | 6.983582  | 9.664926  | 15 -7.164380   | 6.583305 | 4.557919  |
| 6 0.462545   | 7.357942  | 9.534477  | 6 -6.928663    | 5.921132 | 2.872366  |
| 1 0.106859   | 8.321961  | 7.650710  | 6 -7.951229    | 5.231133 | 2.207737  |
| 6 -1.478672  | 6.522710  | 10.693203 | 6 -5.705802    | 6.127731 | 2.221545  |
| 1 -3.365407  | 6.804961  | 9.698068  | 6 -7.748721    | 4.750019 | 0.917720  |
| 6 -0.096608  | 6.709066  | 10.633606 | 1 -8.908955    | 5.065679 | 2.700585  |
| 1 1.539096   | 7.513792  | 9.480797  | 6 -5.504212    | 5.641626 | 0.932190  |
| 1 -1.924881  | 6.005536  | 11.541106 | 1 -4.903530    | 6.653490 | 2.744137  |
| 1 0.540424   | 6.346373  | 11.438461 | 6 -6.523780    | 4.949434 | 0.280904  |
| 6 -1.949437  | 5.234070  | 5.321512  | 1 -8.546669    | 4.209276 | 0.411927  |
| 6 -4.170915  | 4.147399  | 5.223785  | 1 -4.543242    | 5.791167 | 0.442109  |
| 6 -3.650756  | 4.582096  | 6.558858  | 1 -6.361140    | 4.554833 | -0.721178 |
| 7 -2.348180  | 4.955594  | 6.549806  | 6 -8.194238    | 5.360204 | 5.443447  |
| 8 -4.387021  | 4.632845  | 7.577331  | 6 -9.584260    | 5.301467 | 5.259377  |
| 16 -2.991133 | 4.559621  | 4.008412  | 6 -7.578227    | 4.451357 | 6.313922  |
| 6 -5.381270  | 3.546981  | 5.110281  | 6 -10.337750   | 4.334643 | 5.918585  |
| 6 -6.106379  | 3.047063  | 3.965536  | 1 -10.079185   | 6.014243 | 4.600254  |
| 6 -7.429847  | 2.605193  | 4.170683  | 6 -8.338733    | 3.484812 | 6.969286  |
| 6 -5.589426  | 2.979500  | 2.657409  | 1 -6.502312    | 4.512405 | 6.480749  |
| 6 -8.214130  | 2.139479  | 3.126893  | 6 -9.716316    | 3.423339 | 6.771683  |
| 1 -7.848652  | 2.642729  | 5.176845  | 1 -11.414974   | 4.295639 | 5.766454  |
| 6 -6.358027  | 2.507281  | 1.602263  | 1 -7.851578    | 2.783427 | 7.644505  |
| 1 -4.568125  | 3.289759  | 2.446569  | 1 -10.308605   | 2.669866 | 7.287998  |
| 6 -7.667447  | 2.100656  | 1.845736  | 6 -8.295565    | 8.001465 | 4.338652  |
| 1 -9.237218  | 1.815825  | 3.301135  | 6 -8.523642    | 8.585915 | 3.088491  |
| 1 -5.945829  | 2.462498  | 0.597217  | 6 -8.869870    | 8.580402 | 5.480269  |

|              |           |           |                |           |           |
|--------------|-----------|-----------|----------------|-----------|-----------|
| 6 -9.319333  | 9.726280  | 2.981780  | 1 -5.239368    | 3.776966  | 4.932995  |
| 1 -8.080588  | 8.153282  | 2.192061  | 6 0.077081     | 5.457688  | 5.711701  |
| 6 -9.668292  | 9.713459  | 5.368432  | 6 0.183999     | 4.412921  | 6.633319  |
| 1 -8.692352  | 8.138149  | 6.461523  | 6 1.238952     | 5.994278  | 5.149093  |
| 6 -9.892652  | 10.291213 | 4.117859  | 6 1.433383     | 3.918929  | 6.995599  |
| 1 -9.490865  | 10.171527 | 2.003336  | 1 -0.722232    | 3.995425  | 7.070025  |
| 1-10.114257  | 10.149363 | 6.260792  | 6 2.488463     | 5.498436  | 5.512980  |
| 1-10.514322  | 11.180440 | 4.031944  | 1 1.160362     | 6.805584  | 4.429053  |
| 6 -2.278116  | 8.061280  | 4.613510  | 6 2.590631     | 4.461345  | 6.438097  |
| 6 -3.043428  | 8.614318  | 5.807563  | 1 1.504215     | 3.109765  | 7.720752  |
| 1 -2.945164  | 7.476559  | 3.956272  | 1 3.387152     | 5.927678  | 5.072495  |
| 1 -1.908553  | 8.900469  | 4.008235  | 1 3.568239     | 4.077769  | 6.725492  |
| 8 -1.115960  | 7.305674  | 4.903126  | 17 -5.667347   | 0.362271  | -0.568762 |
| 6 -4.279012  | 9.234694  | 5.630377  | 1 -4.731529    | 8.829989  | 3.518045  |
| 6 -5.145091  | 9.030339  | 4.510114  | 1 -6.070130    | 9.607642  | 4.488060  |
| 1 -4.679229  | 9.789988  | 6.479528  |                |           |           |
| 6 -2.390096  | 8.737517  | 7.120044  | <b>1-IM5-N</b> |           |           |
| 6 -1.008833  | 8.964164  | 7.250553  | 46 -0.947784   | -0.300455 | -1.292344 |
| 6 -3.164650  | 8.664512  | 8.291980  | 15 -1.929664   | -1.943298 | -0.098511 |
| 6 -0.433507  | 9.122361  | 8.507513  | 6 -1.934709    | -3.602084 | -0.863420 |
| 1 -0.385285  | 9.025728  | 6.363075  | 6 -2.165134    | -4.772229 | -0.124646 |
| 6 -2.585716  | 8.814718  | 9.545323  | 6 -1.696036    | -3.702784 | -2.239744 |
| 1 -4.229615  | 8.443016  | 8.208695  | 6 -2.169827    | -6.012904 | -0.755015 |
| 6 -1.214731  | 9.046391  | 9.659261  | 1 -2.333060    | -4.712433 | 0.950766  |
| 1 0.636596   | 9.307475  | 8.585591  | 6 -1.700708    | -4.945869 | -2.868918 |
| 1 -3.204389  | 8.739256  | 10.437886 | 1 -1.492016    | -2.795864 | -2.811521 |
| 1 -0.757201  | 9.160545  | 10.640274 | 6 -1.940488    | -6.101114 | -2.127865 |
| 6 -1.286785  | 5.970590  | 5.325966  | 1 -2.351255    | -6.914205 | -0.172033 |
| 6 -3.381875  | 4.569559  | 4.561174  | 1 -1.509511    | -5.011151 | -3.938605 |
| 6 -3.411630  | 5.284561  | 5.893564  | 1 -1.940412    | -7.073232 | -2.618119 |
| 7 -2.278741  | 5.818855  | 6.284241  | 6 -1.130608    | -2.198735 | 1.530094  |
| 8 -4.497895  | 5.338733  | 6.573543  | 6 -1.504363    | -1.425550 | 2.637425  |
| 16 -1.886410 | 4.896194  | 3.742326  | 6 -0.007238    | -3.031641 | 1.636151  |
| 6 -4.424382  | 3.776717  | 4.206011  | 6 -0.768113    | -1.477759 | 3.819265  |
| 6 -4.649451  | 2.950205  | 3.039755  | 1 -2.374391    | -0.770671 | 2.575022  |
| 6 -5.866120  | 2.241348  | 2.962292  | 6 0.727444     | -3.080544 | 2.817454  |
| 6 -3.749069  | 2.809102  | 1.965249  | 1 0.303798     | -3.635723 | 0.785409  |
| 6 -6.183934  | 1.444326  | 1.872282  | 6 0.352522     | -2.301432 | 3.911453  |
| 1 -6.581801  | 2.332056  | 3.780246  | 1 -1.074117    | -0.872690 | 4.671045  |
| 6 -4.049057  | 2.012512  | 0.867739  | 1 1.601198     | -3.727948 | 2.878716  |
| 1 -2.797603  | 3.336698  | 1.973354  | 1 0.929904     | -2.338612 | 4.833474  |
| 6 -5.267701  | 1.340883  | 0.828566  | 6 -3.679048    | -1.591054 | 0.328124  |
| 1 -7.132844  | 0.914946  | 1.829432  | 6 -4.645903    | -2.586276 | 0.513613  |
| 1 -3.342796  | 1.919295  | 0.046186  | 6 -4.050542    | -0.249058 | 0.495678  |

|    |           |           |           |                |           |           |           |
|----|-----------|-----------|-----------|----------------|-----------|-----------|-----------|
| 6  | -5.949834 | -2.245725 | 0.867606  | 1              | 3.949410  | -2.697941 | -0.097284 |
| 1  | -4.387134 | -3.634961 | 0.375711  | 6              | 0.579687  | 1.967855  | 0.976261  |
| 6  | -5.349593 | 0.089340  | 0.864722  | 6              | 1.196845  | 3.221296  | 1.109716  |
| 1  | -3.313839 | 0.535683  | 0.314646  | 6              | -0.815167 | 1.866002  | 1.115674  |
| 6  | -6.303368 | -0.910134 | 1.050026  | 6              | 0.425541  | 4.355668  | 1.335184  |
| 1  | -6.692895 | -3.030102 | 1.000923  | 1              | 2.275984  | 3.313731  | 0.992180  |
| 1  | -5.618269 | 1.136570  | 0.997334  | 6              | -1.576742 | 3.000304  | 1.362817  |
| 1  | -7.322650 | -0.648230 | 1.328196  | 1              | -1.284270 | 0.885188  | 1.056384  |
| 6  | -0.712179 | 2.363810  | -2.534124 | 6              | -0.960176 | 4.249298  | 1.455812  |
| 6  | -2.213149 | 2.433555  | -2.344569 | 1              | 0.907811  | 5.327574  | 1.411769  |
| 1  | -0.477381 | 2.887935  | -3.487779 | 1              | -2.655805 | 2.910659  | 1.480890  |
| 1  | -0.270203 | 3.030190  | -1.749593 | 1              | -1.561741 | 5.140719  | 1.626955  |
| 8  | -0.134662 | 1.123663  | -2.570069 | 17             | 9.612789  | -2.029996 | 2.950736  |
| 6  | -2.984133 | 1.314147  | -2.347957 | 1              | -2.058397 | -0.248349 | -3.531818 |
| 6  | -2.546811 | -0.072418 | -2.565656 | 1              | -3.364271 | -0.791274 | -2.429713 |
| 1  | -4.046694 | 1.444475  | -2.120807 |                |           |           |           |
| 6  | -2.778122 | 3.764081  | -2.066603 |                |           |           |           |
| 6  | -2.124857 | 4.932420  | -2.505790 |                |           |           |           |
| 6  | -3.942136 | 3.934669  | -1.290703 |                |           |           |           |
| 6  | -2.610334 | 6.198393  | -2.191205 |                |           |           |           |
| 1  | -1.227695 | 4.849847  | -3.116944 |                |           |           |           |
| 6  | -4.428434 | 5.198479  | -0.978769 |                |           |           |           |
| 1  | -4.454740 | 3.056570  | -0.897980 |                |           |           |           |
| 6  | -3.765256 | 6.342420  | -1.425572 |                |           |           |           |
| 1  | -2.080828 | 7.079568  | -2.551630 |                |           |           |           |
| 1  | -5.326651 | 5.291424  | -0.369346 |                |           |           |           |
| 1  | -4.143036 | 7.332408  | -1.175398 |                |           |           |           |
| 6  | 1.359411  | 0.780012  | 0.665932  |                |           |           |           |
| 6  | 3.146688  | -0.919687 | 0.499967  |                |           |           |           |
| 6  | 1.897759  | -1.213167 | -0.247836 |                |           |           |           |
| 7  | 0.930789  | -0.209362 | -0.067988 |                |           |           |           |
| 8  | 1.720486  | -2.193472 | -0.955608 |                |           |           |           |
| 16 | 2.999589  | 0.626855  | 1.308083  |                |           |           |           |
| 6  | 4.170323  | -1.808905 | 0.498498  |                |           |           |           |
| 6  | 5.467918  | -1.796979 | 1.125916  |                |           |           |           |
| 6  | 6.304566  | -2.908341 | 0.895622  |                |           |           |           |
| 6  | 5.956833  | -0.760867 | 1.946083  |                |           |           |           |
| 6  | 7.571913  | -2.990969 | 1.448501  |                |           |           |           |
| 1  | 5.944004  | -3.719033 | 0.264550  |                |           |           |           |
| 6  | 7.221217  | -0.829608 | 2.509218  |                |           |           |           |
| 1  | 5.354991  | 0.119894  | 2.158200  |                |           |           |           |
| 6  | 8.018400  | -1.944847 | 2.252477  |                |           |           |           |
| 1  | 8.206770  | -3.851939 | 1.258183  |                |           |           |           |
| 1  | 7.587770  | -0.025369 | 3.141293  |                |           |           |           |
|    |           |           |           | <b>1-TS5-N</b> |           |           |           |
|    |           |           |           | 46             | -0.363124 | -0.651285 | -0.539645 |
|    |           |           |           | 15             | -1.080449 | -2.589454 | 0.282558  |
|    |           |           |           | 6              | -0.094982 | -4.037706 | -0.224251 |
|    |           |           |           | 6              | -0.252969 | -5.283542 | 0.399423  |
|    |           |           |           | 6              | 0.858327  | -3.891931 | -1.238483 |
|    |           |           |           | 6              | 0.525375  | -6.366549 | 0.003804  |
|    |           |           |           | 1              | -0.988829 | -5.404358 | 1.195225  |
|    |           |           |           | 6              | 1.638640  | -4.978077 | -1.630677 |
|    |           |           |           | 1              | 0.991442  | -2.913810 | -1.705163 |
|    |           |           |           | 6              | 1.471965  | -6.214191 | -1.010286 |
|    |           |           |           | 1              | 0.396733  | -7.331473 | 0.490853  |
|    |           |           |           | 1              | 2.382056  | -4.855241 | -2.416010 |
|    |           |           |           | 1              | 2.084398  | -7.061835 | -1.312339 |
|    |           |           |           | 6              | -1.039604 | -2.654212 | 2.109927  |
|    |           |           |           | 6              | -2.141358 | -3.027373 | 2.888039  |
|    |           |           |           | 6              | 0.167914  | -2.317045 | 2.741843  |
|    |           |           |           | 6              | -2.037874 | -3.060732 | 4.278030  |
|    |           |           |           | 1              | -3.081992 | -3.301260 | 2.412164  |
|    |           |           |           | 6              | 0.266350  | -2.361869 | 4.128846  |
|    |           |           |           | 1              | 1.030465  | -2.011346 | 2.143767  |
|    |           |           |           | 6              | -0.836775 | -2.729405 | 4.900121  |
|    |           |           |           | 1              | -2.900992 | -3.351830 | 4.874084  |
|    |           |           |           | 1              | 1.207934  | -2.102773 | 4.610673  |
|    |           |           |           | 1              | -0.759039 | -2.756656 | 5.985575  |
|    |           |           |           | 6              | -2.808516 | -2.962183 | -0.169747 |
|    |           |           |           | 6              | -3.186215 | -4.122457 | -0.852358 |
|    |           |           |           | 6              | -3.778187 | -1.983942 | 0.101957  |

|    |           |           |           |                |           |           |           |
|----|-----------|-----------|-----------|----------------|-----------|-----------|-----------|
| 6  | -4.510426 | -4.304369 | -1.250973 | 1              | 4.852994  | 0.109471  | 0.435561  |
| 1  | -2.446261 | -4.887400 | -1.082859 | 6              | -0.496124 | 2.403008  | 0.880333  |
| 6  | -5.099812 | -2.173292 | -0.286705 | 6              | -0.697188 | 3.767184  | 0.636350  |
| 1  | -3.490970 | -1.064452 | 0.617529  | 6              | -1.477541 | 1.686602  | 1.582733  |
| 6  | -5.467615 | -3.333707 | -0.969865 | 6              | -1.852427 | 4.402896  | 1.084687  |
| 1  | -4.789628 | -5.209395 | -1.787604 | 1              | 0.052187  | 4.345499  | 0.095225  |
| 1  | -5.842495 | -1.407846 | -0.067779 | 6              | -2.629026 | 2.324497  | 2.029039  |
| 1  | -6.499988 | -3.476966 | -1.284077 | 1              | -1.322043 | 0.627130  | 1.785386  |
| 6  | -0.515517 | 2.006669  | -2.142102 | 6              | -2.820999 | 3.684265  | 1.780652  |
| 6  | -1.968915 | 1.590569  | -2.115318 | 1              | -1.996489 | 5.462423  | 0.880727  |
| 1  | -0.108903 | 1.908666  | -3.162860 | 1              | -3.379369 | 1.756617  | 2.577007  |
| 1  | -0.411753 | 3.068820  | -1.872230 | 1              | -3.725597 | 4.181128  | 2.127324  |
| 8  | 0.342795  | 1.232931  | -1.315519 | 17             | 9.043807  | 4.730908  | -1.351260 |
| 6  | -2.305046 | 0.270716  | -2.190650 | 1              | -0.548759 | -0.708722 | -3.004748 |
| 6  | -1.387184 | -0.856424 | -2.308844 | 1              | -1.884135 | -1.812456 | -2.497992 |
| 1  | -3.364592 | 0.017143  | -2.111965 |                |           |           |           |
| 6  | -3.000678 | 2.628359  | -1.990594 | <b>1-IM6-N</b> |           |           |           |
| 6  | -2.796585 | 3.924853  | -2.500809 | 46             | -0.539147 | 3.217146  | 1.438858  |
| 6  | -4.223647 | 2.371365  | -1.340371 | 15             | 1.664637  | 2.673306  | 1.935469  |
| 6  | -3.768443 | 4.912660  | -2.369007 | 6              | 2.206786  | 1.100279  | 1.185167  |
| 1  | -1.873206 | 4.156728  | -3.030620 | 6              | 3.485033  | 0.895650  | 0.654785  |
| 6  | -5.190649 | 3.359997  | -1.205304 | 6              | 1.279125  | 0.049790  | 1.159014  |
| 1  | -4.397914 | 1.390311  | -0.898715 | 6              | 3.833681  | -0.344458 | 0.125156  |
| 6  | -4.969944 | 4.638799  | -1.718290 | 1              | 4.207858  | 1.710158  | 0.639528  |
| 1  | -3.585047 | 5.903640  | -2.781773 | 6              | 1.637065  | -1.195386 | 0.646413  |
| 1  | -6.118210 | 3.134637  | -0.680453 | 1              | 0.265956  | 0.212904  | 1.534619  |
| 1  | -5.726195 | 5.413870  | -1.608137 | 6              | 2.915254  | -1.393937 | 0.128526  |
| 6  | 0.724047  | 1.707884  | 0.406636  | 1              | 4.827278  | -0.489199 | -0.296267 |
| 6  | 3.197570  | 1.302060  | 0.426271  | 1              | 0.906401  | -2.002819 | 0.629389  |
| 6  | 2.330165  | 0.125181  | 0.772909  | 1              | 3.189164  | -2.360044 | -0.293626 |
| 7  | 1.001671  | 0.450483  | 0.850947  | 6              | 2.880962  | 3.968725  | 1.528645  |
| 8  | 2.792333  | -1.000311 | 0.968613  | 6              | 4.186189  | 3.935631  | 2.039000  |
| 16 | 2.214060  | 2.737246  | 0.253765  | 6              | 2.478458  | 5.055200  | 0.743659  |
| 6  | 4.530552  | 1.139715  | 0.268789  | 6              | 5.078090  | 4.964344  | 1.749294  |
| 6  | 5.578227  | 2.064764  | -0.104779 | 1              | 4.504089  | 3.104513  | 2.668944  |
| 6  | 6.856220  | 1.530383  | -0.364327 | 6              | 3.368973  | 6.088986  | 0.465344  |
| 6  | 5.415565  | 3.457905  | -0.229662 | 1              | 1.463721  | 5.071761  | 0.345160  |
| 6  | 7.920670  | 2.331547  | -0.747700 | 6              | 4.669489  | 6.042314  | 0.964509  |
| 1  | 7.007202  | 0.456228  | -0.266219 | 1              | 6.092390  | 4.926924  | 2.142742  |
| 6  | 6.471323  | 4.275600  | -0.608393 | 1              | 3.046906  | 6.932371  | -0.142901 |
| 1  | 4.458904  | 3.929439  | -0.015302 | 1              | 5.365796  | 6.850269  | 0.746287  |
| 6  | 7.714152  | 3.703427  | -0.869052 | 6              | 1.961328  | 2.428166  | 3.729833  |
| 1  | 8.898268  | 1.899947  | -0.946748 | 6              | 2.122052  | 1.166576  | 4.310834  |
| 1  | 6.331585  | 5.349860  | -0.696860 | 6              | 1.954850  | 3.561220  | 4.558643  |

|    |           |           |           |                |           |           |           |
|----|-----------|-----------|-----------|----------------|-----------|-----------|-----------|
| 6  | 2.279103  | 1.041360  | 5.691559  | 1              | 2.342806  | 1.140103  | -2.643999 |
| 1  | 2.133960  | 0.273169  | 3.688456  | 6              | -2.766499 | 2.489788  | -1.835555 |
| 6  | 2.117778  | 3.434036  | 5.933630  | 6              | -4.035203 | 1.916911  | -1.986197 |
| 1  | 1.820782  | 4.551202  | 4.119669  | 6              | -2.425373 | 3.598393  | -2.613409 |
| 6  | 2.279362  | 2.170987  | 6.504846  | 6              | -4.949571 | 2.451464  | -2.887695 |
| 1  | 2.409025  | 0.052882  | 6.128834  | 1              | -4.299300 | 1.040203  | -1.394493 |
| 1  | 2.117030  | 4.323297  | 6.561520  | 6              | -3.338718 | 4.128314  | -3.523201 |
| 1  | 2.406102  | 2.070305  | 7.581194  | 1              | -1.441232 | 4.048824  | -2.495629 |
| 6  | -3.233369 | 2.261534  | 1.060799  | 6              | -4.603564 | 3.560232  | -3.661185 |
| 6  | -2.704293 | 3.649276  | 1.359380  | 1              | -5.934156 | 1.998193  | -2.991300 |
| 1  | -3.397636 | 1.703417  | 1.987411  | 1              | -3.061785 | 4.996745  | -4.119260 |
| 1  | -4.195707 | 2.332279  | 0.537801  | 1              | -5.317777 | 3.977593  | -4.368903 |
| 8  | -2.361602 | 1.377412  | 0.312019  | 17             | 2.695099  | -4.722819 | -5.419445 |
| 6  | -2.127213 | 4.001366  | 2.616508  | 1              | -1.607650 | 2.031135  | 3.420436  |
| 6  | -1.364006 | 3.096495  | 3.385269  | 1              | -0.834595 | 3.474490  | 4.259462  |
| 1  | -2.054568 | 5.065909  | 2.847938  |                |           |           |           |
| 6  | -3.153257 | 4.791455  | 0.516393  | <b>1-IM5-S</b> |           |           |           |
| 6  | -4.448692 | 4.865885  | -0.016616 | 46             | -1.673751 | 7.195515  | 3.974028  |
| 6  | -2.276237 | 5.860240  | 0.269083  | 15             | -1.074417 | 8.032279  | 1.967486  |
| 6  | -4.848504 | 5.969692  | -0.765716 | 6              | -0.180338 | 6.815253  | 0.930439  |
| 1  | -5.164644 | 4.065718  | 0.165030  | 6              | -0.517678 | 6.513012  | -0.394055 |
| 6  | -2.671231 | 6.957507  | -0.488435 | 6              | 0.852778  | 6.089396  | 1.543949  |
| 1  | -1.257233 | 5.804143  | 0.658793  | 6              | 0.164485  | 5.512539  | -1.086001 |
| 6  | -3.962418 | 7.017091  | -1.010959 | 1              | -1.327280 | 7.043898  | -0.890749 |
| 1  | -5.861031 | 6.005452  | -1.165552 | 6              | 1.547793  | 5.107470  | 0.844654  |
| 1  | -1.965114 | 7.764575  | -0.677035 | 1              | 1.100861  | 6.285532  | 2.589061  |
| 1  | -4.274755 | 7.872469  | -1.607257 | 6              | 1.200671  | 4.812666  | -0.473134 |
| 6  | -1.761493 | 1.859564  | -0.889515 | 1              | -0.119479 | 5.282506  | -2.111612 |
| 6  | 0.406828  | 0.958706  | -2.007404 | 1              | 2.352420  | 4.561933  | 1.335829  |
| 6  | 0.529286  | 2.274911  | -1.280789 | 1              | 1.731588  | 4.033560  | -1.016842 |
| 7  | -0.602592 | 2.643603  | -0.638762 | 6              | -2.471115 | 8.659378  | 0.974016  |
| 8  | 1.596887  | 2.900236  | -1.252046 | 6              | -2.276939 | 9.305199  | -0.256606 |
| 16 | -1.160413 | 0.254770  | -1.745916 | 6              | -3.770713 | 8.528555  | 1.476458  |
| 6  | 1.484539  | 0.465145  | -2.662979 | 6              | -3.365740 | 9.788267  | -0.975575 |
| 6  | 1.705341  | -0.801067 | -3.326708 | 1              | -1.268258 | 9.436016  | -0.649262 |
| 6  | 2.979172  | -1.035679 | -3.884848 | 6              | -4.858853 | 9.030098  | 0.764257  |
| 6  | 0.753127  | -1.833953 | -3.431607 | 1              | -3.922823 | 8.034272  | 2.437798  |
| 6  | 3.294342  | -2.225478 | -4.522717 | 6              | -4.657158 | 9.655676  | -0.463478 |
| 1  | 3.738358  | -0.258081 | -3.803903 | 1              | -3.205782 | 10.280634 | -1.933156 |
| 6  | 1.051614  | -3.032962 | -4.065922 | 1              | -5.864607 | 8.924978  | 1.168692  |
| 1  | -0.244479 | -1.711534 | -3.015440 | 1              | -5.506334 | 10.041166 | -1.025536 |
| 6  | 2.319718  | -3.217155 | -4.609813 | 6              | 0.045390  | 9.490651  | 2.045552  |
| 1  | 4.282680  | -2.383960 | -4.947176 | 6              | 1.429720  | 9.341245  | 2.205389  |
| 1  | 0.303139  | -3.817991 | -4.140314 | 6              | -0.494449 | 10.785910 | 2.048294  |

|    |           |           |           |    |                |           |           |
|----|-----------|-----------|-----------|----|----------------|-----------|-----------|
| 6  | 2.252026  | 10.455740 | 2.347183  | 1  | -5.212056      | 4.475086  | 4.002482  |
| 1  | 1.878018  | 8.349056  | 2.209901  | 6  | 0.441355       | 3.868088  | 5.448085  |
| 6  | 0.330451  | 11.898503 | 2.194020  | 6  | 0.844682       | 3.710516  | 6.785055  |
| 1  | -1.566576 | 10.931798 | 1.923974  | 6  | 1.415208       | 3.964027  | 4.443226  |
| 6  | 1.705797  | 11.738181 | 2.342477  | 6  | 2.194070       | 3.663311  | 7.104214  |
| 1  | 3.326174  | 10.318425 | 2.458669  | 1  | 0.084840       | 3.641563  | 7.559829  |
| 1  | -0.107967 | 12.895006 | 2.186465  | 6  | 2.764930       | 3.914387  | 4.768217  |
| 1  | 2.350523  | 12.608368 | 2.450913  | 1  | 1.117431       | 4.061001  | 3.399357  |
| 6  | -2.986386 | 7.210938  | 6.700224  | 6  | 3.156748       | 3.769486  | 6.098769  |
| 6  | -4.091409 | 7.961361  | 5.976653  | 1  | 2.499062       | 3.549973  | 8.142502  |
| 1  | -2.399367 | 7.946184  | 7.297551  | 1  | 3.513550       | 3.986624  | 3.981785  |
| 1  | -3.430456 | 6.513738  | 7.434131  | 1  | 4.214426       | 3.736375  | 6.352825  |
| 8  | -2.154440 | 6.489454  | 5.851340  | 17 | -5.648761      | 6.369908  | -2.181890 |
| 6  | -3.693216 | 8.821821  | 5.004160  | 1  | -1.622622      | 9.155613  | 5.533200  |
| 6  | -2.288396 | 9.044766  | 4.664846  | 1  | -2.124804      | 9.858674  | 3.952483  |
| 1  | -4.440495 | 9.343587  | 4.401244  |    |                |           |           |
| 6  | -5.499770 | 7.688097  | 6.264104  |    | <b>1-TS5-S</b> |           |           |
| 6  | -5.916384 | 7.256553  | 7.538261  | 46 | 1.768658       | 1.611007  | -0.342807 |
| 6  | -6.489222 | 7.817412  | 5.267339  | 15 | 3.047425       | 3.181099  | -1.320071 |
| 6  | -7.254132 | 6.981419  | 7.804706  | 6  | 4.218647       | 4.091897  | -0.245514 |
| 1  | -5.184524 | 7.161519  | 8.338910  | 6  | 5.404541       | 4.645188  | -0.744700 |
| 6  | -7.823919 | 7.540958  | 5.534758  | 6  | 3.911517       | 4.250582  | 1.111884  |
| 1  | -6.194412 | 8.109096  | 4.258550  | 6  | 6.268249       | 5.336071  | 0.100870  |
| 6  | -8.216845 | 7.122388  | 6.807223  | 1  | 5.671695       | 4.519548  | -1.792751 |
| 1  | -7.546747 | 6.659586  | 8.803223  | 6  | 4.775417       | 4.944970  | 1.955807  |
| 1  | -8.563052 | 7.640563  | 4.740751  | 1  | 2.988507       | 3.826386  | 1.509648  |
| 1  | -9.262246 | 6.902256  | 7.015855  | 6  | 5.957667       | 5.484564  | 1.451952  |
| 6  | -0.980324 | 3.956860  | 5.153352  | 1  | 7.193311       | 5.749246  | -0.297752 |
| 6  | -3.175106 | 4.393741  | 4.063647  | 1  | 4.525337       | 5.058200  | 3.009181  |
| 6  | -3.195244 | 3.967624  | 5.495858  | 1  | 6.638078       | 6.018891  | 2.112568  |
| 7  | -1.914880 | 3.669250  | 5.987420  | 6  | 4.049664       | 2.531001  | -2.698243 |
| 8  | -4.216030 | 3.841081  | 6.151818  | 6  | 4.546672       | 3.338432  | -3.732223 |
| 16 | -1.508030 | 4.579262  | 3.534270  | 6  | 4.347254       | 1.162357  | -2.700470 |
| 6  | -4.321995 | 4.617594  | 3.384101  | 6  | 5.326424       | 2.783225  | -4.742739 |
| 6  | -4.572945 | 5.035343  | 2.023301  | 1  | 4.317849       | 4.403620  | -3.750551 |
| 6  | -5.897086 | 5.380120  | 1.683395  | 6  | 5.127378       | 0.608733  | -3.713120 |
| 6  | -3.592487 | 5.115164  | 1.013767  | 1  | 3.960393       | 0.531297  | -1.896643 |
| 6  | -6.237254 | 5.794267  | 0.405035  | 6  | 5.617495       | 1.418938  | -4.734819 |
| 1  | -6.670459 | 5.321846  | 2.448786  | 1  | 5.706328       | 3.418817  | -5.540603 |
| 6  | -3.921422 | 5.512121  | -0.274960 | 1  | 5.349780       | -0.457426 | -3.701934 |
| 1  | -2.558740 | 4.833286  | 1.210455  | 1  | 6.225590       | 0.988013  | -5.528286 |
| 6  | -5.239533 | 5.854210  | -0.565959 | 6  | 2.008380       | 4.507625  | -2.037248 |
| 1  | -7.261648 | 6.064554  | 0.161804  | 6  | 1.558986       | 5.547982  | -1.211033 |
| 1  | -3.160149 | 5.555849  | -1.050098 | 6  | 1.542506       | 4.442018  | -3.357792 |

|    |           |           |           |                |           |           |           |
|----|-----------|-----------|-----------|----------------|-----------|-----------|-----------|
| 6  | 0.674790  | 6.505364  | -1.699312 | 1              | 4.055185  | -2.211555 | 1.324715  |
| 1  | 1.902520  | 5.611587  | -0.178185 | 6              | -0.335786 | 1.327574  | 2.886768  |
| 6  | 0.658195  | 5.402677  | -3.842592 | 6              | -0.338455 | 2.668825  | 2.480945  |
| 1  | 1.880428  | 3.643985  | -4.017571 | 6              | -1.221985 | 0.912821  | 3.885077  |
| 6  | 0.221603  | 6.435686  | -3.015990 | 6              | -1.215815 | 3.577457  | 3.060343  |
| 1  | 0.340786  | 7.310676  | -1.047258 | 1              | 0.341481  | 2.995616  | 1.688661  |
| 1  | 0.313612  | 5.342789  | -4.873434 | 6              | -2.099633 | 1.825485  | 4.464912  |
| 1  | -0.468431 | 7.186120  | -3.397082 | 1              | -1.212394 | -0.128370 | 4.199856  |
| 6  | -0.271657 | -0.701752 | -0.095100 | 6              | -2.099648 | 3.157219  | 4.055640  |
| 6  | 0.690002  | -1.120978 | -1.181582 | 1              | -1.211454 | 4.616324  | 2.735611  |
| 1  | -1.286727 | -0.576989 | -0.509679 | 1              | -2.784343 | 1.492901  | 5.243163  |
| 1  | -0.338854 | -1.487400 | 0.672872  | 1              | -2.785822 | 3.869131  | 4.510895  |
| 8  | 0.079882  | 0.515039  | 0.535145  | 17             | 8.466972  | 1.701789  | -1.503891 |
| 6  | 1.144067  | -0.205269 | -2.089448 | 1              | -0.225828 | 1.474461  | -1.860059 |
| 6  | 0.802490  | 1.203670  | -2.127304 | 1              | 1.145160  | 1.731749  | -3.019749 |
| 1  | 1.886394  | -0.539599 | -2.817684 |                |           |           |           |
| 6  | 1.164726  | -2.507768 | -1.199112 | <b>1-IM6-S</b> |           |           |           |
| 6  | 0.344765  | -3.560988 | -0.752568 | 46             | 1.398730  | 2.175262  | 0.132704  |
| 6  | 2.469066  | -2.826414 | -1.625002 | 15             | 2.494757  | 3.916897  | -0.782056 |
| 6  | 0.806483  | -4.872463 | -0.738924 | 6              | 3.389818  | 5.026761  | 0.367272  |
| 1  | -0.674093 | -3.349795 | -0.429723 | 6              | 3.744013  | 6.327963  | -0.021335 |
| 6  | 2.930512  | -4.137332 | -1.603267 | 6              | 3.751147  | 4.579181  | 1.642850  |
| 1  | 3.138361  | -2.025068 | -1.940528 | 6              | 4.470471  | 7.145865  | 0.838729  |
| 6  | 2.101587  | -5.168574 | -1.160720 | 1              | 3.446110  | 6.705124  | -0.999203 |
| 1  | 0.148724  | -5.669869 | -0.396616 | 6              | 4.478974  | 5.399461  | 2.502117  |
| 1  | 3.949537  | -4.354192 | -1.921352 | 1              | 3.454955  | 3.582730  | 1.968833  |
| 1  | 2.464537  | -6.194500 | -1.140117 | 6              | 4.844050  | 6.681876  | 2.099042  |
| 6  | 0.592408  | 0.352127  | 2.273779  | 1              | 4.742156  | 8.151605  | 0.523132  |
| 6  | 2.879678  | -0.626288 | 1.876018  | 1              | 4.754174  | 5.035243  | 3.490221  |
| 6  | 1.789890  | -1.558659 | 2.368978  | 1              | 5.411502  | 7.324168  | 2.769997  |
| 7  | 0.612664  | -0.916050 | 2.644721  | 6              | 3.738850  | 3.344361  | -1.992409 |
| 8  | 1.997381  | -2.761787 | 2.493605  | 6              | 4.719072  | 4.197234  | -2.516772 |
| 16 | 2.354407  | 1.045648  | 2.018029  | 6              | 3.707755  | 2.005702  | -2.401491 |
| 6  | 4.016639  | -1.119659 | 1.340906  | 6              | 5.653818  | 3.712710  | -3.427003 |
| 6  | 5.128078  | -0.421379 | 0.726474  | 1              | 4.759843  | 5.241531  | -2.209347 |
| 6  | 5.938173  | -1.116300 | -0.192300 | 6              | 4.642915  | 1.523095  | -3.314338 |
| 6  | 5.432503  | 0.927309  | 0.984208  | 1              | 2.956624  | 1.335173  | -1.978732 |
| 6  | 6.966342  | -0.481740 | -0.876177 | 6              | 5.619302  | 2.375654  | -3.824427 |
| 1  | 5.734016  | -2.168392 | -0.389074 | 1              | 6.419068  | 4.379543  | -3.820789 |
| 6  | 6.475294  | 1.568851  | 0.330100  | 1              | 4.616168  | 0.476136  | -3.612800 |
| 1  | 4.877440  | 1.486017  | 1.735587  | 1              | 6.360957  | 1.997623  | -4.526337 |
| 6  | 7.213229  | 0.864663  | -0.616281 | 6              | 1.447625  | 5.089504  | -1.715943 |
| 1  | 7.562993  | -1.021139 | -1.607966 | 6              | 0.524145  | 5.868351  | -1.002471 |
| 1  | 6.707604  | 2.606786  | 0.552640  | 6              | 1.478212  | 5.174330  | -3.111424 |

|    |           |           |           |                |           |           |           |
|----|-----------|-----------|-----------|----------------|-----------|-----------|-----------|
| 6  | -0.335751 | 6.729837  | -1.674168 | 1              | 4.422077  | -1.724633 | 0.181252  |
| 1  | 0.481666  | 5.798682  | 0.085425  | 6              | 0.372652  | 0.477353  | 3.637876  |
| 6  | 0.609733  | 6.035388  | -3.781755 | 6              | 0.433809  | -0.408017 | 4.716632  |
| 1  | 2.182085  | 4.569732  | -3.682033 | 6              | -0.105384 | 1.777441  | 3.845180  |
| 6  | -0.294753 | 6.815242  | -3.066707 | 6              | 0.012556  | -0.004563 | 5.981320  |
| 1  | -1.042704 | 7.335092  | -1.109347 | 1              | 0.806740  | -1.416645 | 4.549330  |
| 1  | 0.645306  | 6.095403  | -4.868022 | 6              | -0.522350 | 2.179242  | 5.109914  |
| 1  | -0.970523 | 7.488047  | -3.591508 | 1              | -0.148319 | 2.473670  | 3.007672  |
| 6  | -0.799904 | -0.050337 | 0.402492  | 6              | -0.466334 | 1.288458  | 6.182049  |
| 6  | -0.199294 | -0.223554 | -0.965068 | 1              | 0.057245  | -0.705509 | 6.813303  |
| 1  | -1.735694 | 0.519930  | 0.361245  | 1              | -0.894401 | 3.191586  | 5.259416  |
| 1  | -0.986539 | -0.999937 | 0.906401  | 1              | -0.795554 | 1.602765  | 7.171048  |
| 8  | 0.067002  | 0.753794  | 1.254655  | 17             | 8.977949  | 2.665280  | -1.281358 |
| 6  | 0.072608  | 0.897028  | -1.704470 | 1              | -0.982303 | 2.461061  | -0.610311 |
| 6  | -0.129146 | 2.263202  | -1.272524 | 1              | -0.036836 | 3.017426  | -2.055355 |
| 1  | 0.558376  | 0.764894  | -2.673222 |                |           |           |           |
| 6  | 0.149311  | -1.564389 | -1.441648 | <b>1-IM7-1</b> |           |           |           |
| 6  | -0.574647 | -2.697272 | -1.026246 | 46             | -1.790983 | 0.044354  | -0.482018 |
| 6  | 1.232021  | -1.765788 | -2.321499 | 15             | -1.261452 | -2.124084 | 0.201715  |
| 6  | -0.240640 | -3.968857 | -1.478944 | 6              | 0.468434  | -2.528384 | -0.232919 |
| 1  | -1.428798 | -2.581392 | -0.360731 | 6              | 1.275462  | -3.379225 | 0.528848  |
| 6  | 1.568043  | -3.037695 | -2.766410 | 6              | 1.004309  | -1.928073 | -1.381280 |
| 1  | 1.838469  | -0.915526 | -2.632307 | 6              | 2.589964  | -3.631344 | 0.142991  |
| 6  | 0.832426  | -4.147825 | -2.349561 | 1              | 0.887912  | -3.832629 | 1.439995  |
| 1  | -0.825135 | -4.826235 | -1.149549 | 6              | 2.316031  | -2.189580 | -1.770784 |
| 1  | 2.418730  | -3.165564 | -3.434140 | 1              | 0.389090  | -1.237493 | -1.963220 |
| 1  | 1.099311  | -5.144786 | -2.695594 | 6              | 3.112000  | -3.042176 | -1.008017 |
| 6  | 0.865988  | 0.046132  | 2.291053  | 1              | 3.211811  | -4.286614 | 0.750859  |
| 6  | 3.194488  | -0.451607 | 1.197229  | 1              | 2.720535  | -1.710271 | -2.661263 |
| 6  | 2.213555  | -1.611953 | 1.417228  | 1              | 4.143109  | -3.235018 | -1.300403 |
| 7  | 1.089680  | -1.259763 | 2.073463  | 6              | -1.543383 | -2.593638 | 1.939143  |
| 8  | 2.519897  | -2.745195 | 1.043384  | 6              | -1.574403 | -3.936017 | 2.342615  |
| 16 | 2.657344  | 1.018043  | 1.976441  | 6              | -1.764754 | -1.587888 | 2.887669  |
| 6  | 4.335253  | -0.685397 | 0.508123  | 6              | -1.801199 | -4.263485 | 3.676391  |
| 6  | 5.439052  | 0.174656  | 0.131339  | 1              | -1.425738 | -4.728227 | 1.608791  |
| 6  | 6.498710  | -0.403637 | -0.596842 | 6              | -1.998423 | -1.918740 | 4.220172  |
| 6  | 5.523356  | 1.551834  | 0.413416  | 1              | -1.729419 | -0.543861 | 2.574975  |
| 6  | 7.584103  | 0.343267  | -1.030639 | 6              | -2.011812 | -3.255225 | 4.616239  |
| 1  | 6.458288  | -1.466712 | -0.831607 | 1              | -1.815560 | -5.308321 | 3.980879  |
| 6  | 6.603193  | 2.315170  | -0.009947 | 1              | -2.167726 | -1.130619 | 4.951694  |
| 1  | 4.723662  | 2.053640  | 0.954123  | 1              | -2.192871 | -3.512344 | 5.658555  |
| 6  | 7.624604  | 1.702950  | -0.731177 | 6              | -2.240963 | -3.365308 | -0.729605 |
| 1  | 8.388040  | -0.121736 | -1.595228 | 6              | -1.797445 | -3.855775 | -1.963433 |
| 1  | 6.643584  | 3.381151  | 0.205881  | 6              | -3.516755 | -3.731145 | -0.275892 |



|    |           |           |           |                 |           |           |           |
|----|-----------|-----------|-----------|-----------------|-----------|-----------|-----------|
| 6  | -2.606888 | -4.698593 | -2.722805 | 1               | 3.155891  | -0.514639 | 1.668628  |
| 1  | -0.811476 | -3.582886 | -2.337919 | 6               | -0.000974 | 3.511198  | 0.009868  |
| 6  | -4.320606 | -4.578179 | -1.033562 | 6               | 0.273188  | 4.705298  | -0.669795 |
| 1  | -3.885679 | -3.348723 | 0.676185  | 6               | -0.595353 | 3.573661  | 1.271033  |
| 6  | -3.868579 | -5.063788 | -2.260571 | 6               | -0.048119 | 5.933003  | -0.103798 |
| 1  | -2.243362 | -5.074506 | -3.677668 | 1               | 0.737964  | 4.665282  | -1.655730 |
| 1  | -5.305328 | -4.859430 | -0.663583 | 6               | -0.916247 | 4.806190  | 1.841201  |
| 1  | -4.498746 | -5.724995 | -2.852506 | 1               | -0.816245 | 2.649088  | 1.802118  |
| 6  | -1.455048 | 2.585747  | -2.240992 | 6               | -0.647418 | 5.987507  | 1.156523  |
| 6  | -2.553520 | 1.857976  | -1.483480 | 1               | 0.168871  | 6.851421  | -0.646822 |
| 1  | -1.561635 | 2.429061  | -3.319580 | 1               | -1.388500 | 4.837166  | 2.822294  |
| 1  | -1.488258 | 3.664077  | -2.050285 | 1               | -0.900886 | 6.948851  | 1.600392  |
| 8  | -0.127627 | 2.093439  | -1.977639 | 17              | 9.198972  | 0.143981  | -0.658663 |
| 6  | -3.005413 | 0.644517  | -2.084025 | 1               | -4.423596 | -0.063462 | -0.575776 |
| 6  | -3.708489 | -0.338027 | -1.353753 | 1               | -3.891525 | -1.300300 | -1.831504 |
| 1  | -2.546935 | 0.361767  | -3.035274 |                 |           |           |           |
| 6  | -3.375520 | 2.655607  | -0.525946 |                 |           |           |           |
| 6  | -3.750850 | 3.960730  | -0.889751 | <b>1-IM7-1a</b> |           |           |           |
| 6  | -3.802546 | 2.180527  | 0.725107  | 6               | 1.255331  | 0.142638  | 0.108058  |
| 6  | -4.524069 | 4.751511  | -0.045600 | 6               | -0.635828 | -1.058102 | -1.287815 |
| 1  | -3.450861 | 4.358870  | -1.858076 | 6               | 0.603651  | -1.820568 | -0.925247 |
| 6  | -4.571310 | 2.974624  | 1.573055  | 7               | 1.559743  | -1.143965 | -0.327154 |
| 1  | -3.496945 | 1.187228  | 1.057752  | 8               | 0.680559  | -3.069600 | -1.167402 |
| 6  | -4.937774 | 4.263525  | 1.192253  | 16              | -0.548193 | 0.549997  | -0.628650 |
| 1  | -4.803591 | 5.756034  | -0.359622 | 6               | -1.611021 | -1.653437 | -2.020633 |
| 1  | -4.877127 | 2.582742  | 2.541878  | 6               | -2.888675 | -1.150396 | -2.480014 |
| 1  | -5.536998 | 4.884023  | 1.856077  | 6               | -3.661964 | -1.967690 | -3.330734 |
| 6  | 0.340304  | 2.176349  | -0.635166 | 6               | -3.427078 | 0.102074  | -2.124844 |
| 6  | 2.331328  | 0.892255  | 0.428516  | 6               | -4.899630 | -1.564535 | -3.810722 |
| 6  | 0.953367  | 0.477515  | 0.873530  | 1               | -3.273360 | -2.943435 | -3.620982 |
| 7  | -0.030228 | 1.051458  | 0.145868  | 6               | -4.665680 | 0.520027  | -2.592852 |
| 8  | 0.786266  | -0.357480 | 1.771125  | 1               | -2.883606 | 0.766476  | -1.457348 |
| 16 | 2.237040  | 2.092093  | -0.829426 | 6               | -5.392054 | -0.317778 | -3.433679 |
| 6  | 3.409787  | 0.231217  | 0.912636  | 1               | -5.477826 | -2.210309 | -4.466796 |
| 6  | 4.803487  | 0.286947  | 0.527464  | 1               | -5.065230 | 1.488233  | -2.301500 |
| 6  | 5.664791  | -0.716853 | 1.017090  | 1               | -1.380583 | -2.680639 | -2.308797 |
| 6  | 5.360921  | 1.257212  | -0.328131 | 17              | -6.959111 | 0.201332  | -4.018438 |
| 6  | 7.004417  | -0.770661 | 0.662939  | 6               | 1.853054  | -1.981800 | 2.281508  |
| 1  | 5.259791  | -1.479219 | 1.682425  | 6               | 1.468130  | -3.287363 | 2.561871  |
| 6  | 6.701168  | 1.219646  | -0.691666 | 1               | 0.401361  | -3.467949 | 2.716514  |
| 1  | 4.753457  | 2.077763  | -0.703852 | 6               | 2.352201  | -4.418853 | 2.448480  |
| 6  | 7.510566  | 0.201703  | -0.196809 | 1               | 3.415035  | -4.281032 | 2.658163  |
| 1  | 7.649075  | -1.557807 | 1.046022  | 1               | 1.969258  | -5.391260 | 2.763902  |
| 1  | 7.112980  | 1.978142  | -1.352588 | 6               | 2.199610  | 1.212975  | -0.383714 |
|    |           |           |           | 6               | 2.494775  | 2.345216  | 0.379898  |

|    |           |           |           |                |           |            |           |
|----|-----------|-----------|-----------|----------------|-----------|------------|-----------|
| 6  | 2.793826  | 1.062738  | -1.640748 | 6              | 5.015262  | -8.767188  | 1.966728  |
| 6  | 3.376748  | 3.308300  | -0.107394 | 1              | 3.752024  | -10.183307 | 0.944524  |
| 1  | 2.042578  | 2.465140  | 1.361901  | 1              | 6.145972  | -7.129116  | 2.803748  |
| 6  | 3.674746  | 2.023958  | -2.124644 | 1              | 5.483766  | -9.519297  | 2.598969  |
| 1  | 2.562082  | 0.179598  | -2.235656 | 6              | 2.119956  | -6.377228  | -1.974131 |
| 6  | 3.970212  | 3.151192  | -1.358272 | 6              | 2.796220  | -7.006070  | -3.028370 |
| 1  | 3.604466  | 4.184105  | 0.498184  | 6              | 0.721553  | -6.415037  | -1.932915 |
| 1  | 4.135012  | 1.890875  | -3.102551 | 6              | 2.080602  | -7.663579  | -4.024049 |
| 1  | 4.661881  | 3.903036  | -1.734467 | 1              | 3.885572  | -6.981664  | -3.069254 |
| 6  | 3.249934  | -1.489690 | 2.293449  | 6              | 0.008185  | -7.078335  | -2.929199 |
| 6  | 4.304564  | -2.087726 | 1.585793  | 1              | 0.197170  | -5.910955  | -1.120258 |
| 6  | 3.539025  | -0.337128 | 3.046592  | 6              | 0.686876  | -7.700634  | -3.974972 |
| 6  | 5.592714  | -1.564950 | 1.631969  | 1              | 2.611803  | -8.148687  | -4.840921 |
| 1  | 4.105345  | -2.951944 | 0.952587  | 1              | -1.079359 | -7.102613  | -2.891219 |
| 6  | 4.830111  | 0.175600  | 3.106761  | 1              | 0.130000  | -8.213143  | -4.757330 |
| 1  | 2.742646  | 0.160236  | 3.596575  |                |           |            |           |
| 6  | 5.864641  | -0.433021 | 2.397623  | <b>1-TS6-1</b> |           |            |           |
| 1  | 6.383094  | -2.046489 | 1.056349  | 6              | 1.021131  | 0.308002   | 0.494318  |
| 1  | 5.026236  | 1.063623  | 3.705237  | 6              | -0.715543 | -1.084437  | -0.896204 |
| 1  | 6.871984  | -0.022209 | 2.435295  | 6              | 0.458535  | -1.826103  | -0.352504 |
| 8  | 1.175203  | 0.252206  | 1.512758  | 7              | 1.336524  | -1.069142  | 0.323119  |
| 6  | 0.777064  | -0.917402 | 2.206386  | 8              | 0.586842  | -3.059928  | -0.546551 |
| 1  | -0.149229 | -1.339019 | 1.786635  | 16             | -0.733259 | 0.555308   | -0.300184 |
| 1  | 0.536734  | -0.562309 | 3.217962  | 6              | -1.569647 | -1.717192  | -1.737814 |
| 46 | 1.873144  | -3.929740 | 0.505926  | 6              | -2.760334 | -1.260825  | -2.419485 |
| 15 | 3.017688  | -5.515663 | -0.641419 | 6              | -3.367151 | -2.151493  | -3.328876 |
| 6  | 4.412531  | -4.665659 | -1.471588 | 6              | -3.356022 | 0.004797   | -2.253238 |
| 6  | 5.661060  | -5.270772 | -1.665468 | 6              | -4.499472 | -1.805645  | -4.048944 |
| 6  | 4.213049  | -3.351115 | -1.919880 | 1              | -2.927217 | -3.137618  | -3.471830 |
| 6  | 6.690354  | -4.571624 | -2.292586 | 6              | -4.492791 | 0.366713   | -2.964573 |
| 1  | 5.833161  | -6.290543 | -1.322689 | 1              | -2.937911 | 0.726675   | -1.555283 |
| 6  | 5.242745  | -2.657934 | -2.549946 | 6              | -5.052816 | -0.541538  | -3.859153 |
| 1  | 3.247922  | -2.867175 | -1.752688 | 1              | -4.947929 | -2.505453  | -4.749059 |
| 6  | 6.484505  | -3.266172 | -2.733610 | 1              | -4.940617 | 1.347186   | -2.824287 |
| 1  | 7.657327  | -5.050963 | -2.435268 | 1              | -1.287682 | -2.750541  | -1.945266 |
| 1  | 5.078472  | -1.635521 | -2.887317 | 17             | -6.483177 | -0.091786  | -4.761460 |
| 1  | 7.292426  | -2.721108 | -3.218286 | 6              | 2.019312  | -1.521874  | 2.108437  |
| 6  | 3.813367  | -6.833862 | 0.335212  | 6              | 1.871097  | -2.913911  | 2.441463  |
| 6  | 3.445860  | -8.179041 | 0.225312  | 1              | 0.881866  | -3.211056  | 2.798835  |
| 6  | 4.785332  | -6.465279 | 1.278946  | 6              | 2.957278  | -3.843123  | 2.552337  |
| 6  | 4.044623  | -9.139140 | 1.040686  | 1              | 3.982597  | -3.471653  | 2.611874  |
| 1  | 2.693702  | -8.483275 | -0.501659 | 1              | 2.785834  | -4.745235  | 3.143606  |
| 6  | 5.386360  | -7.426760 | 2.082995  | 6              | 2.007379  | 1.228864   | -0.195234 |
| 1  | 5.078420  | -5.418153 | 1.374670  | 6              | 2.610111  | 2.292551   | 0.477485  |

|    |           |           |           |                |           |           |           |
|----|-----------|-----------|-----------|----------------|-----------|-----------|-----------|
| 6  | 2.366993  | 0.963180  | -1.520983 | 6              | 6.639808  | -7.909196 | 1.645169  |
| 6  | 3.575118  | 3.068756  | -0.164531 | 1              | 5.698348  | -9.610988 | 0.716744  |
| 1  | 2.342080  | 2.497480  | 1.510970  | 1              | 7.372386  | -6.027238 | 2.409643  |
| 6  | 3.330009  | 1.736060  | -2.157294 | 1              | 7.345963  | -8.509074 | 2.216641  |
| 1  | 1.895506  | 0.134918  | -2.051293 | 6              | 2.770401  | -6.382564 | -1.875940 |
| 6  | 3.942095  | 2.791022  | -1.478015 | 6              | 3.450138  | -7.019664 | -2.923541 |
| 1  | 4.047438  | 3.889651  | 0.372553  | 6              | 1.390032  | -6.570672 | -1.743817 |
| 1  | 3.606512  | 1.515351  | -3.186843 | 6              | 2.760045  | -7.836856 | -3.813615 |
| 1  | 4.701728  | 3.392639  | -1.974079 | 1              | 4.525477  | -6.877676 | -3.038967 |
| 6  | 3.398980  | -0.955553 | 1.981761  | 6              | 0.699305  | -7.389771 | -2.635331 |
| 6  | 4.211313  | -1.280445 | 0.888661  | 1              | 0.861998  | -6.060251 | -0.935726 |
| 6  | 3.909100  | -0.105368 | 2.968406  | 6              | 1.384279  | -8.023406 | -3.669683 |
| 6  | 5.505812  | -0.783724 | 0.786151  | 1              | 3.295605  | -8.329590 | -4.623256 |
| 1  | 3.797541  | -1.913687 | 0.101760  | 1              | -0.374621 | -7.529027 | -2.523965 |
| 6  | 5.205860  | 0.396874  | 2.864827  | 1              | 0.846359  | -8.661277 | -4.369036 |
| 1  | 3.297712  | 0.170962  | 3.826139  |                |           |           |           |
| 6  | 6.008672  | 0.059164  | 1.777589  |                |           |           |           |
| 1  | 6.118060  | -1.048861 | -0.075547 | <b>1-IM8-1</b> |           |           |           |
| 1  | 5.585940  | 1.060761  | 3.639390  | 6              | 0.519165  | 0.488461  | 0.945165  |
| 1  | 7.018323  | 0.458463  | 1.698166  | 6              | -1.341116 | -1.309552 | 0.506423  |
| 8  | 0.975521  | 0.609181  | 1.862664  | 6              | -0.110545 | -1.486518 | -0.303357 |
| 6  | 0.965269  | -0.582246 | 2.632923  | 7              | 0.868327  | -0.593011 | 0.036474  |
| 1  | -0.021431 | -1.069960 | 2.618753  | 8              | -0.001682 | -2.357783 | -1.177131 |
| 1  | 1.176267  | -0.273599 | 3.662862  | 16             | -1.141915 | -0.053905 | 1.709790  |
| 46 | 2.287602  | -3.975203 | 0.603596  | 6              | -2.388929 | -2.145323 | 0.297131  |
| 15 | 3.613634  | -5.281344 | -0.678861 | 6              | -3.645702 | -2.296742 | 0.993557  |
| 6  | 4.665003  | -4.231776 | -1.758708 | 6              | -4.506923 | -3.329102 | 0.567660  |
| 6  | 6.005589  | -4.508838 | -2.050971 | 6              | -4.064088 | -1.506800 | 2.082345  |
| 6  | 4.070919  | -3.090050 | -2.318871 | 6              | -5.717203 | -3.576973 | 1.195898  |
| 6  | 6.736723  | -3.659783 | -2.880456 | 1              | -4.208276 | -3.952079 | -0.274416 |
| 1  | 6.483869  | -5.392330 | -1.629087 | 6              | -5.272290 | -1.742422 | 2.723135  |
| 6  | 4.798663  | -2.249849 | -3.156325 | 1              | -3.449627 | -0.686912 | 2.446175  |
| 1  | 3.028562  | -2.860417 | -2.082245 | 6              | -6.087258 | -2.779307 | 2.276457  |
| 6  | 6.136594  | -2.531252 | -3.434876 | 1              | -6.364845 | -4.380706 | 0.855497  |
| 1  | 7.779483  | -3.886051 | -3.097071 | 1              | -5.576935 | -1.126820 | 3.565301  |
| 1  | 4.323421  | -1.370612 | -3.588202 | 1              | -2.226764 | -2.846224 | -0.523124 |
| 1  | 6.710644  | -1.869985 | -4.081616 | 17             | -7.604197 | -3.085910 | 3.087566  |
| 6  | 4.820532  | -6.364947 | 0.169593  | 6              | 2.343373  | -0.876264 | 0.218759  |
| 6  | 4.813418  | -7.760100 | 0.067979  | 6              | 2.707251  | -2.307858 | -0.077100 |
| 6  | 5.746232  | -5.753366 | 1.030510  | 1              | 2.231403  | -3.032802 | 0.590205  |
| 6  | 5.716847  | -8.525974 | 0.805559  | 6              | 3.856208  | -2.695365 | -0.793039 |
| 1  | 4.101350  | -8.256062 | -0.590499 | 1              | 4.588526  | -1.962145 | -1.133525 |
| 6  | 6.654331  | -6.517503 | 1.754292  | 1              | 4.259541  | -3.695677 | -0.630807 |
| 1  | 5.756711  | -4.665438 | 1.124527  | 6              | 0.358344  | 1.819244  | 0.236215  |
|    |           |           |           | 6              | 1.134415  | 2.920701  | 0.596883  |

|    |           |           |           |                |           |           |           |
|----|-----------|-----------|-----------|----------------|-----------|-----------|-----------|
| 6  | -0.516879 | 1.918049  | -0.850543 | 6              | 6.708676  | -2.679684 | -5.943872 |
| 6  | 1.037279  | 4.109869  | -0.125149 | 1              | 6.113668  | -4.171346 | -7.381651 |
| 1  | 1.830492  | 2.838763  | 1.427750  | 1              | 7.002339  | -1.204756 | -4.394055 |
| 6  | -0.600515 | 3.099307  | -1.576957 | 1              | 7.733489  | -2.621549 | -6.306653 |
| 1  | -1.124982 | 1.060041  | -1.142410 | 6              | 1.542955  | -4.180185 | -5.294564 |
| 6  | 0.177255  | 4.200602  | -1.215268 | 6              | 0.969868  | -3.992692 | -6.558833 |
| 1  | 1.646864  | 4.964172  | 0.163416  | 6              | 1.498734  | -5.456486 | -4.715678 |
| 1  | -1.277187 | 3.163139  | -2.427118 | 6              | 0.365633  | -5.056169 | -7.226340 |
| 1  | 0.109515  | 5.126239  | -1.783962 | 1              | 0.996225  | -3.009308 | -7.028333 |
| 6  | 3.135817  | 0.135936  | -0.599257 | 6              | 0.904923  | -6.521632 | -5.387961 |
| 6  | 4.374500  | 0.610002  | -0.164315 | 1              | 1.932720  | -5.609859 | -3.725898 |
| 6  | 2.650384  | 0.564228  | -1.839090 | 6              | 0.333164  | -6.321833 | -6.644011 |
| 6  | 5.103248  | 1.508960  | -0.943329 | 1              | -0.079917 | -4.894841 | -8.206747 |
| 1  | 4.788144  | 0.276361  | 0.786507  | 1              | 0.880155  | -7.507299 | -4.925858 |
| 6  | 3.373142  | 1.462962  | -2.618682 | 1              | -0.141562 | -7.150882 | -7.165883 |
| 1  | 1.684841  | 0.194724  | -2.185977 |                |           |           |           |
| 6  | 4.604365  | 1.941944  | -2.169222 | <b>1-IM7-2</b> |           |           |           |
| 1  | 6.064137  | 1.873546  | -0.584188 | 6              | 0.460341  | 0.787499  | 0.055948  |
| 1  | 2.969259  | 1.789772  | -3.576547 | 6              | 0.465849  | -1.297398 | -1.548287 |
| 1  | 5.170757  | 2.649977  | -2.771914 | 6              | 1.731251  | -0.990287 | -0.742656 |
| 8  | 1.534206  | 0.560194  | 1.889685  | 7              | 1.671155  | 0.138797  | -0.026487 |
| 6  | 2.368094  | -0.589919 | 1.726193  | 8              | 2.700082  | -1.765967 | -0.794199 |
| 1  | 1.952275  | -1.446922 | 2.276186  | 16             | -0.744795 | -0.087531 | -1.294612 |
| 1  | 3.351196  | -0.340937 | 2.130680  | 6              | 0.449034  | -2.401826 | -2.336770 |
| 46 | 2.153725  | -2.715807 | -2.083526 | 6              | -0.567982 | -2.929818 | -3.221906 |
| 15 | 2.351349  | -2.834782 | -4.340466 | 6              | -0.274865 | -4.105326 | -3.945493 |
| 6  | 1.663804  | -1.306105 | -5.103463 | 6              | -1.835947 | -2.349546 | -3.427801 |
| 6  | 2.218968  | -0.697378 | -6.235980 | 6              | -1.180484 | -4.671482 | -4.831047 |
| 6  | 0.540214  | -0.717722 | -4.504120 | 1              | 0.696836  | -4.579046 | -3.807552 |
| 6  | 1.663383  | 0.469023  | -6.758355 | 6              | -2.755387 | -2.902532 | -4.309898 |
| 1  | 3.091184  | -1.139493 | -6.718002 | 1              | -2.116683 | -1.445344 | -2.892621 |
| 6  | -0.019877 | 0.444180  | -5.030320 | 6              | -2.418892 | -4.058844 | -5.007005 |
| 1  | 0.115155  | -1.173432 | -3.605716 | 1              | -0.928952 | -5.575316 | -5.380899 |
| 6  | 0.542985  | 1.040943  | -6.158541 | 1              | -3.726129 | -2.435059 | -4.456263 |
| 1  | 2.107265  | 0.930469  | -7.639270 | 1              | 1.380497  | -2.970807 | -2.295315 |
| 1  | -0.894192 | 0.887372  | -4.555298 | 17             | -3.573913 | -4.752015 | -6.130556 |
| 1  | 0.111570  | 1.953619  | -6.566369 | 6              | 1.228191  | -1.059439 | 2.372841  |
| 6  | 4.066290  | -2.832552 | -5.008712 | 6              | 1.694958  | -2.350285 | 2.059522  |
| 6  | 4.486278  | -3.620917 | -6.085353 | 1              | 1.104509  | -2.941891 | 1.358754  |
| 6  | 4.993059  | -1.971628 | -4.400780 | 6              | 2.646485  | -3.012984 | 2.883371  |
| 6  | 5.801775  | -3.548885 | -6.544350 | 1              | 3.490016  | -2.487217 | 3.329814  |
| 1  | 3.784033  | -4.293544 | -6.577022 | 1              | 2.813181  | -4.077531 | 2.716473  |
| 6  | 6.299473  | -1.886584 | -4.870650 | 6              | 0.453098  | 2.259899  | -0.266383 |
| 1  | 4.679779  | -1.361603 | -3.549560 | 6              | -0.652146 | 3.055611  | 0.055376  |

|    |           |           |           |                |           |           |           |
|----|-----------|-----------|-----------|----------------|-----------|-----------|-----------|
| 6  | 1.542429  | 2.840751  | -0.918408 | 6              | 3.053409  | -7.927310 | 5.668932  |
| 6  | -0.663084 | 4.409457  | -0.266881 | 1              | 4.210129  | -7.488177 | 7.434295  |
| 1  | -1.506500 | 2.606377  | 0.558699  | 1              | 1.784816  | -8.075049 | 3.928901  |
| 6  | 1.531550  | 4.196293  | -1.239112 | 1              | 3.459681  | -8.930806 | 5.556442  |
| 1  | 2.399707  | 2.217095  | -1.165277 | 6              | 2.306007  | -2.768591 | 7.287708  |
| 6  | 0.430003  | 4.985586  | -0.913743 | 6              | 2.122594  | -2.908392 | 8.669323  |
| 1  | -1.529428 | 5.017711  | -0.011241 | 6              | 3.294910  | -1.897597 | 6.809777  |
| 1  | 2.389605  | 4.638442  | -1.743453 | 6              | 2.921940  | -2.192086 | 9.556096  |
| 1  | 0.421577  | 6.044879  | -1.165045 | 1              | 1.353939  | -3.580958 | 9.050806  |
| 6  | 1.997336  | -0.073745 | 3.154424  | 6              | 4.093997  | -1.184760 | 7.699440  |
| 6  | 3.383184  | 0.083124  | 2.986627  | 1              | 3.427641  | -1.777226 | 5.732300  |
| 6  | 1.335127  | 0.736614  | 4.095538  | 6              | 3.907185  | -1.331309 | 9.073233  |
| 6  | 4.087045  | 1.001638  | 3.756759  | 1              | 2.773774  | -2.305456 | 10.628453 |
| 1  | 3.894514  | -0.499236 | 2.221058  | 1              | 4.855930  | -0.507047 | 7.317814  |
| 6  | 2.045400  | 1.649062  | 4.869243  | 1              | 4.526413  | -0.769010 | 9.769807  |
| 1  | 0.256991  | 0.641637  | 4.224596  |                |           |           |           |
| 6  | 3.423334  | 1.782314  | 4.704866  |                |           |           |           |
| 1  | 5.158557  | 1.120714  | 3.606127  | <b>1-TS6-2</b> |           |           |           |
| 1  | 1.518499  | 2.264103  | 5.596626  | 6              | -0.030293 | 0.460291  | 0.107380  |
| 1  | 3.977933  | 2.502913  | 5.303313  | 6              | 0.276341  | -1.219466 | -1.908152 |
| 8  | -0.187781 | 0.656028  | 1.321161  | 6              | 1.459585  | -1.014680 | -0.990322 |
| 6  | -0.133880 | -0.647604 | 1.860724  | 7              | 1.223759  | -0.157812 | 0.037222  |
| 1  | -0.497070 | -1.391001 | 1.132588  | 8              | 2.525404  | -1.613705 | -1.154418 |
| 1  | -0.855840 | -0.632170 | 2.689682  | 16             | -1.114189 | -0.340746 | -1.349944 |
| 46 | 1.051584  | -2.465749 | 4.127594  | 6              | 0.427886  | -2.036877 | -2.979495 |
| 15 | 1.292559  | -3.677505 | 6.072987  | 6              | -0.498472 | -2.460491 | -4.006117 |
| 6  | -0.320665 | -3.918431 | 6.886947  | 6              | -0.025156 | -3.357232 | -4.986407 |
| 6  | -0.637399 | -5.048351 | 7.649186  | 6              | -1.841886 | -2.046807 | -4.102495 |
| 6  | -1.277258 | -2.906098 | 6.723185  | 6              | -0.837022 | -3.823590 | -6.008950 |
| 6  | -1.891134 | -5.156571 | 8.247552  | 1              | 1.010167  | -3.692515 | -4.936135 |
| 1  | 0.098839  | -5.842067 | 7.776791  | 6              | -2.668796 | -2.502802 | -5.120822 |
| 6  | -2.526707 | -3.015349 | 7.326218  | 1              | -2.257563 | -1.352045 | -3.376134 |
| 1  | -1.034384 | -2.028873 | 6.117276  | 6              | -2.158931 | -3.388855 | -6.065883 |
| 6  | -2.834382 | -4.142811 | 8.087654  | 1              | -0.451124 | -4.515806 | -6.752875 |
| 1  | -2.131632 | -6.037103 | 8.840357  | 1              | -3.702497 | -2.171428 | -5.179992 |
| 1  | -3.264197 | -2.225874 | 7.194463  | 1              | 1.436698  | -2.446198 | -3.063906 |
| 1  | -3.813562 | -4.233000 | 8.554171  | 17             | -3.198347 | -3.965137 | -7.351355 |
| 6  | 2.020769  | -5.343446 | 5.953530  | 6              | 1.308320  | -1.112497 | 1.842912  |
| 6  | 2.961894  | -5.830669 | 6.867013  | 6              | 1.886619  | -2.403913 | 1.649663  |
| 6  | 1.604525  | -6.161288 | 4.892912  | 1              | 1.278830  | -3.127172 | 1.103465  |
| 6  | 3.476196  | -7.117961 | 6.720849  | 6              | 3.157249  | -2.805022 | 2.126218  |
| 1  | 3.296032  | -5.206818 | 7.695504  | 1              | 3.939623  | -2.077648 | 2.345531  |
| 6  | 2.113828  | -7.448311 | 4.755804  | 1              | 3.527682  | -3.788132 | 1.832420  |
| 1  | 0.880605  | -5.779957 | 4.170482  | 6              | -0.050635 | 1.953096  | -0.103128 |
|    |           |           |           | 6              | -1.181281 | 2.696448  | 0.252076  |

|    |           |           |           |                |           |           |           |
|----|-----------|-----------|-----------|----------------|-----------|-----------|-----------|
| 6  | 1.048796  | 2.603210  | -0.665861 | 6              | 5.012423  | -7.662490 | 5.077702  |
| 6  | -1.207526 | 4.072376  | 0.048851  | 1              | 6.285741  | -7.096899 | 6.723856  |
| 1  | -2.041629 | 2.192182  | 0.689848  | 1              | 3.599662  | -7.951509 | 3.472297  |
| 6  | 1.019184  | 3.981229  | -0.869831 | 1              | 5.516410  | -8.613244 | 4.912572  |
| 1  | 1.930122  | 2.022745  | -0.933442 | 6              | 4.019430  | -2.508345 | 6.519494  |
| 6  | -0.107123 | 4.719530  | -0.513778 | 6              | 4.243836  | -2.508434 | 7.902730  |
| 1  | -2.091267 | 4.642599  | 0.330381  | 6              | 4.723481  | -1.602928 | 5.714316  |
| 1  | 1.883068  | 4.479149  | -1.307435 | 6              | 5.158242  | -1.620912 | 8.465194  |
| 1  | -0.129059 | 5.796243  | -0.673419 | 1              | 3.698551  | -3.202744 | 8.542496  |
| 6  | 2.040401  | -0.070980 | 2.619391  | 6              | 5.641178  | -0.720259 | 6.278239  |
| 6  | 3.276166  | 0.409647  | 2.166288  | 1              | 4.534895  | -1.588655 | 4.638605  |
| 6  | 1.521663  | 0.428155  | 3.822852  | 6              | 5.857693  | -0.727228 | 7.655134  |
| 6  | 3.984520  | 1.350339  | 2.905888  | 1              | 5.324040  | -1.627275 | 9.541212  |
| 1  | 3.660088  | 0.050960  | 1.212050  | 1              | 6.178500  | -0.018688 | 5.641808  |
| 6  | 2.233703  | 1.370164  | 4.563399  | 1              | 6.567860  | -0.031633 | 8.098482  |
| 1  | 0.559257  | 0.074765  | 4.192880  |                |           |           |           |
| 6  | 3.466992  | 1.833127  | 4.108605  |                |           |           |           |
| 1  | 4.940171  | 1.717986  | 2.535877  | <b>1-IM8-2</b> |           |           |           |
| 1  | 1.817780  | 1.745097  | 5.497058  | 6              | -3.070801 | 1.793422  | 0.888020  |
| 1  | 4.019299  | 2.574260  | 4.684057  | 6              | -4.528068 | -0.006100 | -0.352220 |
| 8  | -0.644625 | 0.192362  | 1.341901  | 6              | -3.262899 | 0.365531  | -1.055183 |
| 6  | -0.200880 | -1.058229 | 1.833089  | 7              | -2.476296 | 1.214840  | -0.291736 |
| 1  | -0.596052 | -1.884965 | 1.219816  | 8              | -2.946841 | -0.047400 | -2.161430 |
| 1  | -0.625292 | -1.149939 | 2.839301  | 16             | -4.593558 | 0.654893  | 1.263755  |
| 46 | 1.896689  | -2.807935 | 3.793567  | 6              | -5.388149 | -0.842858 | -0.983052 |
| 15 | 2.826896  | -3.636727 | 5.713232  | 6              | -6.610853 | -1.475225 | -0.543468 |
| 6  | 1.611080  | -3.975425 | 7.038048  | 6              | -7.240020 | -2.363140 | -1.440324 |
| 6  | 1.465000  | -5.219030 | 7.661750  | 6              | -7.211058 | -1.289349 | 0.717545  |
| 6  | 0.752445  | -2.924846 | 7.398853  | 6              | -8.400610 | -3.041738 | -1.105430 |
| 6  | 0.481057  | -5.405527 | 8.632805  | 1              | -6.795158 | -2.522904 | -2.421572 |
| 1  | 2.122553  | -6.045617 | 7.393551  | 6              | -8.374826 | -1.960048 | 1.068730  |
| 6  | -0.219866 | -3.111029 | 8.375372  | 1              | -6.774867 | -0.608617 | 1.444919  |
| 1  | 0.855271  | -1.952528 | 6.911503  | 6              | -8.957844 | -2.833743 | 0.154330  |
| 6  | -0.359432 | -4.355031 | 8.992648  | 1              | -8.866708 | -3.726469 | -1.808983 |
| 1  | 0.376000  | -6.377644 | 9.111619  | 1              | -8.824266 | -1.806685 | 2.046473  |
| 1  | -0.874426 | -2.286018 | 8.651305  | 1              | -5.067531 | -1.103722 | -1.993410 |
| 1  | -1.125062 | -4.503828 | 9.751770  | 17             | 10.418396 | -3.688752 | 0.593300  |
| 6  | 3.729527  | -5.210798 | 5.496626  | 6              | -1.007762 | 0.955545  | -0.006415 |
| 6  | 4.805808  | -5.592323 | 6.306627  | 6              | -0.495644 | -0.316694 | -0.629563 |
| 6  | 3.305406  | -6.069283 | 4.473750  | 1              | -1.019082 | -1.212992 | -0.284609 |
| 6  | 5.444976  | -6.811701 | 6.093852  | 6              | 0.231153  | -0.387109 | -1.822243 |
| 1  | 5.148465  | -4.933482 | 7.104708  | 1              | 0.443494  | 0.508171  | -2.409972 |
| 6  | 3.938230  | -7.292358 | 4.269833  | 1              | 0.243358  | -1.319943 | -2.387430 |
| 1  | 2.475284  | -5.763641 | 3.832939  | 6              | -3.583133 | 3.204275  | 0.737791  |
|    |           |           |           | 6              | -3.626801 | 4.046184  | 1.852198  |



|    |           |           |           |                |           |           |           |
|----|-----------|-----------|-----------|----------------|-----------|-----------|-----------|
| 1  | 3.660411  | 4.574971  | -0.358414 | 1              | -1.483489 | -3.051997 | -7.135517 |
| 6  | 1.321629  | 4.582812  | 2.727703  | 1              | 0.253214  | -3.289444 | -8.901289 |
| 1  | 0.458061  | 2.788733  | 1.880883  | 6              | 3.497195  | -2.197457 | -3.433093 |
| 6  | 2.273893  | 5.587224  | 2.576906  | 6              | 4.511032  | -3.159951 | -3.349565 |
| 1  | 3.861104  | 6.365491  | 1.337444  | 6              | 3.853030  | -0.844460 | -3.542454 |
| 1  | 0.659881  | 4.582980  | 3.592283  | 6              | 5.850870  | -2.777378 | -3.385223 |
| 1  | 2.363213  | 6.372948  | 3.325069  | 1              | 4.255780  | -4.215522 | -3.257731 |
| 6  | -1.184984 | 2.792456  | -1.027963 | 6              | 5.191110  | -0.465295 | -3.590649 |
| 6  | -2.095221 | 2.336496  | -0.060689 | 1              | 3.066867  | -0.085748 | -3.578319 |
| 6  | -1.137303 | 4.163869  | -1.309846 | 6              | 6.193029  | -1.432505 | -3.509689 |
| 6  | -2.924902 | 3.225715  | 0.608311  | 1              | 6.630183  | -3.534838 | -3.309402 |
| 1  | -2.124274 | 1.277068  | 0.192532  | 1              | 5.451879  | 0.589034  | -3.670481 |
| 6  | -1.980862 | 5.052396  | -0.646653 | 1              | 7.240530  | -1.136238 | -3.529208 |
| 1  | -0.439297 | 4.547439  | -2.049996 | 1              | 0.041506  | 0.578041  | -4.225304 |
| 6  | -2.872709 | 4.590221  | 0.316693  | 1              | -1.410399 | -0.501078 | -4.005377 |
| 1  | -3.613323 | 2.853996  | 1.365294  |                |           |           |           |
| 1  | -1.932907 | 6.113705  | -0.883542 | <b>1-IM8-3</b> |           |           |           |
| 1  | -3.523649 | 5.287258  | 0.841463  | 6              | -2.998913 | 0.925892  | -0.734305 |
| 8  | 1.676522  | 3.180949  | -1.615807 | 6              | -0.689067 | 1.685794  | 0.262724  |
| 6  | 0.898201  | 2.367443  | -2.475931 | 6              | -1.272523 | 0.477576  | 0.908694  |
| 1  | 1.500223  | 1.525770  | -2.857250 | 7              | -2.448082 | 0.080379  | 0.299861  |
| 1  | 0.611570  | 3.005721  | -3.319395 | 8              | -0.776560 | -0.089134 | 1.885049  |
| 46 | 0.491509  | -1.111917 | -2.238667 | 16             | -1.587217 | 2.144948  | -1.164642 |
| 15 | 1.712533  | -2.609855 | -3.408177 | 6              | 0.444441  | 2.220849  | 0.783874  |
| 6  | 1.658484  | -4.312803 | -2.736775 | 6              | 1.274673  | 3.315812  | 0.336834  |
| 6  | 1.901569  | -5.453840 | -3.511651 | 6              | 2.462336  | 3.582626  | 1.050533  |
| 6  | 1.382567  | -4.460392 | -1.371168 | 6              | 0.983732  | 4.135644  | -0.770749 |
| 6  | 1.881183  | -6.717458 | -2.925615 | 6              | 3.322723  | 4.605119  | 0.680329  |
| 1  | 2.113756  | -5.351572 | -4.576495 | 1              | 2.709628  | 2.966431  | 1.914599  |
| 6  | 1.368074  | -5.723684 | -0.785397 | 6              | 1.833144  | 5.163273  | -1.154274 |
| 1  | 1.170660  | -3.571345 | -0.771513 | 1              | 0.075283  | 3.989861  | -1.349403 |
| 6  | 1.618753  | -6.853427 | -1.562888 | 6              | 2.998198  | 5.387511  | -0.426251 |
| 1  | 2.074852  | -7.598757 | -3.534755 | 1              | 4.234422  | 4.794017  | 1.241498  |
| 1  | 1.154240  | -5.826228 | 0.277271  | 1              | 1.591758  | 5.783852  | -2.013225 |
| 1  | 1.603174  | -7.842296 | -1.107754 | 1              | 0.787606  | 1.711929  | 1.686910  |
| 6  | 1.303922  | -2.837792 | -5.181424 | 17             | 4.077539  | 6.671954  | -0.914712 |
| 6  | 2.274076  | -2.978470 | -6.180981 | 6              | -2.787629 | -1.346125 | -0.064305 |
| 6  | -0.050876 | -2.864036 | -5.541584 | 6              | -1.805722 | -2.367935 | 0.460334  |
| 6  | 1.895196  | -3.139996 | -7.512678 | 1              | -1.871723 | -2.560096 | 1.532318  |
| 1  | 3.332176  | -2.963869 | -5.920532 | 6              | -1.218375 | -3.340720 | -0.356328 |
| 6  | -0.427794 | -3.033568 | -6.870300 | 6              | -4.220107 | 1.723337  | -0.344859 |
| 1  | -0.811890 | -2.744797 | -4.768334 | 6              | -5.081351 | 2.183775  | -1.345364 |
| 6  | 0.546373  | -3.167713 | -7.859895 | 6              | -4.497972 | 2.011305  | 0.992554  |
| 1  | 2.659424  | -3.245660 | -8.280866 | 6              | -6.212406 | 2.919942  | -1.008128 |



|    |           |           |           |                |           |           |           |
|----|-----------|-----------|-----------|----------------|-----------|-----------|-----------|
| 1  | -4.867888 | 1.956905  | -2.388215 | 1              | 3.353923  | -6.178226 | -1.530452 |
| 6  | -5.634909 | 2.744700  | 1.325717  | 1              | 5.055310  | -5.714092 | -3.285502 |
| 1  | -3.832159 | 1.648454  | 1.774391  | 6              | 2.621165  | 0.023800  | -1.635100 |
| 6  | -6.494030 | 3.200613  | 0.328519  | 6              | 3.667008  | 0.945697  | -1.502796 |
| 1  | -6.879442 | 3.271944  | -1.793079 | 6              | 1.673455  | 0.216675  | -2.651457 |
| 1  | -5.850130 | 2.956194  | 2.371559  | 6              | 3.765985  | 2.028848  | -2.375623 |
| 1  | -7.381588 | 3.773161  | 0.591280  | 1              | 4.411220  | 0.817738  | -0.716245 |
| 6  | -4.191355 | -1.618011 | 0.472093  | 6              | 1.778514  | 1.292463  | -3.527811 |
| 6  | -4.386191 | -1.541492 | 1.857361  | 1              | 0.842021  | -0.485456 | -2.746403 |
| 6  | -5.286179 | -1.900733 | -0.346030 | 6              | 2.825684  | 2.202963  | -3.389553 |
| 6  | -5.642101 | -1.752862 | 2.413289  | 1              | 4.582028  | 2.741275  | -2.260792 |
| 1  | -3.541894 | -1.291726 | 2.501452  | 1              | 1.031884  | 1.428939  | -4.308522 |
| 6  | -6.548719 | -2.109533 | 0.211255  | 1              | 2.902504  | 3.054312  | -4.064152 |
| 1  | -5.172852 | -1.942545 | -1.427446 | 1              | -1.413267 | -3.392593 | -1.428390 |
| 6  | -6.731012 | -2.038507 | 1.588834  | 1              | -0.872157 | -4.274113 | 0.088171  |
| 1  | -5.774161 | -1.686753 | 3.491872  |                |           |           |           |
| 1  | -7.393408 | -2.322738 | -0.441627 |                |           |           |           |
| 1  | -7.717440 | -2.198330 | 2.020261  |                |           |           |           |
| 8  | -3.318607 | 0.100082  | -1.812233 | <b>2-IM5-O</b> |           |           |           |
| 6  | -2.709771 | -1.167628 | -1.580421 | 46             | -1.190250 | -0.550988 | -0.202860 |
| 1  | -1.652868 | -1.152766 | -1.895230 | 15             | -3.267764 | -0.669489 | 0.653897  |
| 1  | -3.254469 | -1.907005 | -2.171584 | 6              | -4.540541 | -1.675136 | -0.194147 |
| 46 | 0.227276  | -1.800713 | 0.079525  | 6              | -4.403402 | -3.071883 | -0.157691 |
| 15 | 2.395019  | -1.442156 | -0.554061 | 6              | -5.602812 | -1.118073 | -0.913555 |
| 6  | 3.504975  | -1.110808 | 0.866880  | 6              | -5.314239 | -3.890158 | -0.816779 |
| 6  | 4.877023  | -1.388970 | 0.871670  | 1              | -3.577356 | -3.520947 | 0.396238  |
| 6  | 2.920805  | -0.544366 | 2.008548  | 6              | -6.512858 | -1.941099 | -1.576030 |
| 6  | 5.649298  | -1.098265 | 1.994844  | 1              | -5.731675 | -0.037319 | -0.950484 |
| 1  | 5.344681  | -1.835654 | -0.006532 | 6              | -6.372505 | -3.325489 | -1.529346 |
| 6  | 3.695426  | -0.243139 | 3.125860  | 1              | -5.197082 | -4.971611 | -0.774709 |
| 1  | 1.843938  | -0.351664 | 2.013817  | 1              | -7.339747 | -1.492971 | -2.124381 |
| 6  | 5.061529  | -0.522877 | 3.120638  | 1              | -7.086354 | -3.965315 | -2.045207 |
| 1  | 6.714614  | -1.323168 | 1.990336  | 6              | -3.295034 | -1.371872 | 2.342678  |
| 1  | 3.229912  | 0.199806  | 4.005265  | 6              | -4.500981 | -1.693780 | 2.982639  |
| 1  | 5.666936  | -0.298330 | 3.997103  | 6              | -2.084247 | -1.631838 | 2.996084  |
| 6  | 3.273106  | -2.768593 | -1.469594 | 6              | -4.492706 | -2.252198 | 4.256914  |
| 6  | 4.233198  | -2.517055 | -2.457588 | 1              | -5.450112 | -1.509423 | 2.477997  |
| 6  | 2.961474  | -4.097221 | -1.149237 | 6              | -2.078747 | -2.195785 | 4.270439  |
| 6  | 4.869181  | -3.573692 | -3.107552 | 1              | -1.145758 | -1.391836 | 2.493776  |
| 1  | 4.488331  | -1.490327 | -2.720867 | 6              | -3.281559 | -2.502957 | 4.902421  |
| 6  | 3.605343  | -5.151461 | -1.790884 | 1              | -5.433831 | -2.495738 | 4.747150  |
| 1  | 2.200430  | -4.298478 | -0.392377 | 1              | -1.131979 | -2.397203 | 4.768809  |
| 6  | 4.558821  | -4.890968 | -2.774798 | 1              | -3.277119 | -2.944647 | 5.897475  |
| 1  | 5.611650  | -3.365744 | -3.876340 | 6              | -3.992380 | 1.004785  | 0.774364  |
|    |           |           |           | 6              | -4.523355 | 1.530271  | 1.956373  |

|    |           |           |           |                |           |           |           |
|----|-----------|-----------|-----------|----------------|-----------|-----------|-----------|
| 6  | -3.942760 | 1.816871  | -0.369703 | 6              | -0.412502 | 5.551761  | 0.339709  |
| 6  | -5.004287 | 2.838098  | 1.990818  | 6              | -1.726071 | 5.951477  | 0.643149  |
| 1  | -4.554124 | 0.925177  | 2.860781  | 6              | 0.488469  | 6.497729  | -0.173712 |
| 6  | -4.436342 | 3.117128  | -0.336671 | 6              | -2.125802 | 7.262167  | 0.426802  |
| 1  | -3.500294 | 1.425341  | -1.287452 | 1              | -2.416837 | 5.217997  | 1.051543  |
| 6  | -4.968098 | 3.631230  | 0.846225  | 6              | 0.084361  | 7.808978  | -0.383890 |
| 1  | -5.408111 | 3.236943  | 2.919778  | 1              | 1.512337  | 6.211544  | -0.413621 |
| 1  | -4.391237 | 3.735928  | -1.231332 | 6              | -1.223609 | 8.194226  | -0.087665 |
| 1  | -5.340708 | 4.654060  | 0.877462  | 1              | -3.146084 | 7.559506  | 0.661847  |
| 6  | 1.374369  | -1.416647 | -1.602357 | 1              | 0.790901  | 8.533354  | -0.782735 |
| 6  | 0.937006  | -2.776055 | -1.084063 | 1              | -1.538527 | 9.222178  | -0.257325 |
| 8  | 0.708369  | -0.344041 | -1.018362 | 17             | 7.415741  | -0.730908 | -0.795092 |
| 6  | -0.398934 | -3.018844 | -1.081282 | 1              | 1.235829  | -1.393934 | -2.707262 |
| 6  | -1.377197 | -2.052296 | -1.581780 | 1              | 2.464348  | -1.295653 | -1.441180 |
| 1  | -0.779314 | -3.954034 | -0.661507 | 1              | -2.395541 | -2.440229 | -1.665579 |
| 6  | 1.921246  | -3.728926 | -0.570812 | 1              | -1.076376 | -1.554321 | -2.514408 |
| 6  | 3.230529  | -3.776874 | -1.087562 |                |           |           |           |
| 6  | 1.604847  | -4.612560 | 0.480851  |                |           |           |           |
| 6  | 4.171726  | -4.671356 | -0.585265 | <b>2-TS5-O</b> |           |           |           |
| 1  | 3.507211  | -3.118633 | -1.910875 | 46             | 1.180179  | -1.377069 | -0.012634 |
| 6  | 2.547481  | -5.500289 | 0.984709  | 15             | 3.252476  | -0.535473 | -0.128631 |
| 1  | 0.610332  | -4.575925 | 0.925769  | 6              | 4.415255  | -0.843543 | 1.247354  |
| 6  | 3.838660  | -5.536550 | 0.455118  | 6              | 5.031699  | -2.101182 | 1.343925  |
| 1  | 5.174815  | -4.688177 | -1.010696 | 6              | 4.633650  | 0.098581  | 2.258324  |
| 1  | 2.277091  | -6.160031 | 1.808274  | 6              | 5.857827  | -2.401055 | 2.422696  |
| 1  | 4.577399  | -6.229657 | 0.853477  | 1              | 4.863548  | -2.849189 | 0.567554  |
| 6  | -0.031000 | 4.165139  | 0.558723  | 6              | 5.457530  | -0.207311 | 3.339964  |
| 6  | 1.154664  | 2.016731  | 0.732959  | 1              | 4.165170  | 1.080176  | 2.202235  |
| 6  | -0.250622 | 2.021369  | 1.125736  | 6              | 6.071510  | -1.454552 | 3.424610  |
| 7  | -0.847922 | 3.263248  | 1.032283  | 1              | 6.333883  | -3.378231 | 2.481881  |
| 8  | -0.869515 | 0.999343  | 1.505663  | 1              | 5.622414  | 0.537969  | 4.115988  |
| 16 | 1.605431  | 3.608307  | 0.165570  | 1              | 6.714972  | -1.690796 | 4.270085  |
| 6  | 1.887465  | 0.865447  | 0.809943  | 6              | 4.177219  | -1.100027 | -1.597160 |
| 6  | 3.242745  | 0.562063  | 0.426563  | 6              | 5.556345  | -0.882412 | -1.730572 |
| 6  | 4.025617  | 1.361760  | -0.426840 | 6              | 3.488405  | -1.773034 | -2.614058 |
| 6  | 3.790880  | -0.651402 | 0.884826  | 6              | 6.228697  | -1.319872 | -2.867822 |
| 6  | 5.302231  | 0.971322  | -0.801854 | 1              | 6.104132  | -0.368811 | -0.940382 |
| 1  | 3.631017  | 2.288308  | -0.838618 | 6              | 4.164963  | -2.209269 | -3.751364 |
| 6  | 5.073149  | -1.047435 | 0.535390  | 1              | 2.417511  | -1.949022 | -2.507069 |
| 1  | 3.189407  | -1.294252 | 1.526998  | 6              | 5.533553  | -1.982097 | -3.879702 |
| 6  | 5.814726  | -0.230199 | -0.313369 | 1              | 7.298814  | -1.144475 | -2.963186 |
| 1  | 5.893537  | 1.589330  | -1.472030 | 1              | 3.621573  | -2.731568 | -4.536635 |
| 1  | 5.486260  | -1.982833 | 0.902952  | 1              | 6.062388  | -2.324760 | -4.767400 |
| 1  | 1.362261  | 0.062349  | 1.326216  | 6              | 3.137127  | 1.284766  | -0.247758 |
|    |           |           |           | 6              | 3.894782  | 2.039096  | -1.149758 |





|    |           |           |           |                |           |           |           |
|----|-----------|-----------|-----------|----------------|-----------|-----------|-----------|
| 6  | -3.177543 | -3.337889 | 3.179638  | 6              | -1.104700 | 3.240615  | -0.532039 |
| 6  | -5.906985 | -3.734853 | 2.797908  | 6              | -0.552135 | 4.425621  | -1.043885 |
| 1  | -5.985615 | -1.667875 | 2.214522  | 6              | -2.080314 | 3.328900  | 0.473452  |
| 6  | -3.740737 | -4.586177 | 3.430119  | 6              | -0.968816 | 5.659800  | -0.560203 |
| 1  | -2.107175 | -3.192735 | 3.315474  | 1              | 0.208582  | 4.358197  | -1.819392 |
| 6  | -5.106544 | -4.788254 | 3.234868  | 6              | -2.495115 | 4.564445  | 0.954397  |
| 1  | -6.974279 | -3.885063 | 2.644858  | 1              | -2.513371 | 2.418480  | 0.893156  |
| 1  | -3.108118 | -5.405746 | 3.766336  | 6              | -1.939551 | 5.736494  | 0.439786  |
| 1  | -5.545860 | -5.766918 | 3.418978  | 1              | -0.534372 | 6.571151  | -0.967452 |
| 6  | 1.505693  | -1.662186 | 0.293648  | 1              | -3.253200 | 4.611347  | 1.735639  |
| 6  | 1.298756  | -0.516617 | 1.281659  | 1              | -2.262777 | 6.705484  | 0.815530  |
| 8  | 0.313585  | -2.362770 | -0.049020 | 17             | -5.891318 | -4.227011 | -1.499637 |
| 6  | 0.859348  | -0.736165 | 2.606276  | 1              | 2.173573  | -2.410199 | 0.742558  |
| 6  | -0.002776 | -1.794466 | 2.979293  | 1              | 1.984062  | -1.287948 | -0.619357 |
| 1  | 0.999250  | 0.074878  | 3.323763  | 1              | -0.341671 | -1.839725 | 4.013870  |
| 6  | 1.916843  | 0.795031  | 0.992447  | 1              | 0.025559  | -2.748814 | 2.449749  |
| 6  | 3.039405  | 0.923356  | 0.159877  |                |           |           |           |
| 6  | 1.392851  | 1.964279  | 1.576246  |                |           |           |           |
| 6  | 3.623824  | 2.168091  | -0.062304 | <b>2-TS6-1</b> |           |           |           |
| 1  | 3.474625  | 0.045113  | -0.311979 | 6              | 3.229198  | -1.938345 | 0.212669  |
| 6  | 1.969031  | 3.206216  | 1.346116  | 6              | 3.384814  | -0.443842 | 0.144151  |
| 1  | 0.483831  | 1.891726  | 2.177641  | 8              | 2.153583  | -2.282278 | 1.067358  |
| 6  | 3.093317  | 3.313598  | 0.525843  | 6              | 3.699930  | 0.251235  | 1.379769  |
| 1  | 4.498111  | 2.239643  | -0.706921 | 6              | 3.785707  | -0.308243 | 2.679320  |
| 1  | 1.524191  | 4.096904  | 1.789453  | 1              | 4.197647  | 1.212712  | 1.251748  |
| 1  | 3.545250  | 4.286206  | 0.339247  | 6              | 3.809777  | 0.212129  | -1.097584 |
| 6  | -0.630829 | 1.948791  | -1.019294 | 6              | 4.187636  | -0.521699 | -2.238399 |
| 6  | -0.362212 | -0.466896 | -1.486598 | 6              | 3.809356  | 1.621311  | -1.193990 |
| 6  | 0.631310  | 0.361466  | -2.068096 | 6              | 4.547832  | 0.124278  | -3.416287 |
| 7  | 0.369025  | 1.751600  | -1.808164 | 1              | 4.222304  | -1.607261 | -2.205495 |
| 8  | 1.626303  | -0.003923 | -2.723002 | 6              | 4.145054  | 2.259942  | -2.378878 |
| 16 | -1.536301 | 0.462277  | -0.590347 | 1              | 3.496488  | 2.223176  | -0.341754 |
| 6  | -0.294671 | -1.932580 | -1.308302 | 6              | 4.518516  | 1.514056  | -3.498006 |
| 6  | -1.657289 | -2.589480 | -1.354832 | 1              | 4.845668  | -0.467480 | -4.279877 |
| 6  | -2.479520 | -2.357077 | -2.464454 | 1              | 4.106558  | 3.346872  | -2.432465 |
| 6  | -2.155277 | -3.373517 | -0.309839 | 1              | 4.787187  | 2.015604  | -4.426101 |
| 6  | -3.767944 | -2.872883 | -2.531993 | 6              | 0.458127  | 1.736823  | -1.039585 |
| 1  | -2.107640 | -1.740244 | -3.282348 | 6              | 1.091332  | -0.501696 | -0.194269 |
| 6  | -3.448627 | -3.896534 | -0.355729 | 6              | 0.996155  | -0.359144 | -1.644976 |
| 1  | -1.537307 | -3.567772 | 0.563592  | 7              | 0.706297  | 0.957003  | -2.046851 |
| 6  | -4.242469 | -3.631443 | -1.463582 | 8              | 1.227800  | -1.272740 | -2.442702 |
| 1  | -4.401541 | -2.673311 | -3.392824 | 16             | 0.489310  | 0.961674  | 0.567525  |
| 1  | -3.834510 | -4.486039 | 0.474369  | 6              | 0.939133  | -1.864273 | 0.428750  |
| 1  | 0.346613  | -2.319549 | -2.119528 | 6              | -0.199730 | -2.011927 | 1.402678  |
|    |           |           |           | 6              | -1.512617 | -1.875978 | 0.937235  |

|    |           |           |           |                |           |           |           |
|----|-----------|-----------|-----------|----------------|-----------|-----------|-----------|
| 6  | 0.011135  | -2.285931 | 2.755779  | 1              | 2.981113  | 3.000807  | 3.923983  |
| 6  | -2.596846 | -2.006996 | 1.796687  | 6              | 3.074129  | 4.428104  | 7.015304  |
| 1  | -1.690541 | -1.662656 | -0.117424 | 1              | 1.783829  | 3.895308  | 8.659494  |
| 6  | -1.064381 | -2.429109 | 3.632140  | 1              | 4.213327  | 4.741400  | 5.209530  |
| 1  | 1.026587  | -2.391367 | 3.132898  | 1              | 3.617348  | 5.180703  | 7.584273  |
| 6  | -2.355903 | -2.283176 | 3.140962  | 6              | -0.810828 | 2.010131  | 4.155362  |
| 1  | -3.614369 | -1.894228 | 1.430109  | 6              | -1.195268 | 3.293568  | 4.558499  |
| 1  | -0.892104 | -2.639736 | 4.686201  | 6              | -1.676166 | 1.266320  | 3.337836  |
| 1  | 0.771470  | -2.542497 | -0.428539 | 6              | -2.422757 | 3.818227  | 4.151066  |
| 6  | 0.171432  | 3.162834  | -1.145030 | 1              | -0.537793 | 3.888827  | 5.191426  |
| 6  | 0.206298  | 3.780410  | -2.406450 | 6              | -2.904976 | 1.783268  | 2.947173  |
| 6  | -0.131481 | 3.938003  | -0.013934 | 1              | -1.369004 | 0.276227  | 2.994688  |
| 6  | -0.057726 | 5.138215  | -2.527978 | 6              | -3.279365 | 3.066568  | 3.350308  |
| 1  | 0.447935  | 3.178565  | -3.279908 | 1              | -2.709975 | 4.820033  | 4.466733  |
| 6  | -0.399237 | 5.294608  | -0.141487 | 1              | -3.566398 | 1.190322  | 2.316621  |
| 1  | -0.157576 | 3.480956  | 0.976171  | 1              | -4.235863 | 3.479759  | 3.034999  |
| 6  | -0.362427 | 5.898681  | -1.398423 |                |           |           |           |
| 1  | -0.025098 | 5.608111  | -3.509090 |                |           |           |           |
| 1  | -0.636388 | 5.882462  | 0.743003  | <b>2-IM8-1</b> |           |           |           |
| 1  | -0.568928 | 6.962856  | -1.496755 | 6              | 1.374835  | -2.996435 | -0.340817 |
| 17 | -3.712667 | -2.416899 | 4.242857  | 6              | 1.797089  | -1.623862 | 0.187230  |
| 1  | 4.123712  | -2.405801 | 0.644055  | 8              | 0.004296  | -3.095354 | -0.000728 |
| 1  | 3.056347  | -2.368714 | -0.784720 | 6              | 1.984284  | -1.657112 | 1.714035  |
| 1  | 4.483745  | 0.142910  | 3.385730  | 6              | 1.704332  | -2.723870 | 2.569845  |
| 1  | 3.567528  | -1.362472 | 2.854354  | 1              | 2.721619  | -0.931006 | 2.067495  |
| 46 | 1.971248  | 0.773800  | 2.616127  | 6              | 3.097596  | -1.109981 | -0.411429 |
| 15 | 0.808785  | 1.244219  | 4.533981  | 6              | 3.926888  | -1.921510 | -1.190881 |
| 6  | 0.387310  | -0.092162 | 5.713065  | 6              | 3.513719  | 0.201551  | -0.143156 |
| 6  | 1.332301  | -1.108683 | 5.909212  | 6              | 5.130586  | -1.432020 | -1.697638 |
| 6  | -0.830518 | -0.151183 | 6.401838  | 1              | 3.643075  | -2.948905 | -1.411646 |
| 6  | 1.067356  | -2.161449 | 6.779898  | 6              | 4.709279  | 0.694841  | -0.655038 |
| 1  | 2.275993  | -1.076168 | 5.361079  | 1              | 2.893581  | 0.844974  | 0.483223  |
| 6  | -1.097212 | -1.210331 | 7.268026  | 6              | 5.524789  | -0.122950 | -1.436627 |
| 1  | -1.576091 | 0.631323  | 6.258902  | 1              | 5.760330  | -2.082016 | -2.302877 |
| 6  | -0.151595 | -2.216625 | 7.456772  | 1              | 5.005903  | 1.719904  | -0.439013 |
| 1  | 1.807660  | -2.947099 | 6.920635  | 1              | 6.463137  | 0.258083  | -1.835441 |
| 1  | -2.050355 | -1.250151 | 7.793048  | 6              | 0.244400  | 1.754206  | -0.293247 |
| 1  | -0.365722 | -3.046996 | 8.127379  | 6              | 0.523454  | -0.772390 | -0.253318 |
| 6  | 1.681029  | 2.483921  | 5.560440  | 6              | 0.752688  | -0.005970 | -1.572745 |
| 6  | 1.350416  | 2.738210  | 6.897936  | 7              | 0.599001  | 1.368126  | -1.487708 |
| 6  | 2.717475  | 3.212597  | 4.963663  | 8              | 1.029337  | -0.601686 | -2.600875 |
| 6  | 2.045880  | 3.705416  | 7.620013  | 16             | 0.057608  | 0.501916  | 0.955616  |
| 1  | 0.544877  | 2.179965  | 7.376326  | 6              | -0.565878 | -1.900362 | -0.497683 |
| 6  | 3.408591  | 4.183297  | 5.684856  | 6              | -1.946702 | -1.714400 | 0.057184  |
|    |           |           |           | 6              | -2.810970 | -0.782368 | -0.525688 |

|    |           |           |           |                |           |           |           |
|----|-----------|-----------|-----------|----------------|-----------|-----------|-----------|
| 6  | -2.408879 | -2.492262 | 1.121937  | 1              | -2.675961 | 0.159985  | 2.171706  |
| 6  | -4.110084 | -0.618121 | -0.056048 | 6              | -3.798787 | 3.082519  | 3.500905  |
| 1  | -2.469816 | -0.178637 | -1.367659 | 1              | -3.382421 | 3.768423  | 5.502186  |
| 6  | -3.712167 | -2.353141 | 1.596112  | 1              | -4.034664 | 2.140101  | 1.570404  |
| 1  | -1.747464 | -3.225531 | 1.579010  | 1              | -4.378645 | 3.964202  | 3.233212  |
| 6  | -4.544226 | -1.410145 | 1.004503  | 6              | -2.612253 | -1.963222 | 4.829734  |
| 1  | -4.776963 | 0.111373  | -0.508758 | 6              | -3.945551 | -1.644928 | 5.115152  |
| 1  | -4.068998 | -2.968157 | 2.419538  | 6              | -2.239514 | -3.312035 | 4.740123  |
| 1  | -0.630141 | -1.980771 | -1.597681 | 6              | -4.886872 | -2.655453 | 5.304602  |
| 6  | 0.001043  | 3.148724  | 0.049097  | 1              | -4.254958 | -0.601914 | 5.182871  |
| 6  | 0.132806  | 4.131826  | -0.946940 | 6              | -3.178455 | -4.320489 | 4.938712  |
| 6  | -0.370353 | 3.533557  | 1.348262  | 1              | -1.205406 | -3.565979 | 4.497288  |
| 6  | -0.104834 | 5.465567  | -0.647283 | 6              | -4.506111 | -3.993019 | 5.216652  |
| 1  | 0.420658  | 3.827465  | -1.950548 | 1              | -5.922179 | -2.394743 | 5.518910  |
| 6  | -0.611393 | 4.869183  | 1.640971  | 1              | -2.876552 | -5.363982 | 4.865175  |
| 1  | -0.475909 | 2.786750  | 2.136022  | 1              | -5.243847 | -4.780522 | 5.360193  |
| 6  | -0.478463 | 5.836981  | 0.645071  |                |           |           |           |
| 1  | 0.000666  | 6.220636  | -1.423448 | <b>2-IM7-2</b> |           |           |           |
| 1  | -0.902230 | 5.156087  | 2.649591  | 6              | -2.851389 | -2.517890 | -2.473627 |
| 1  | -0.667053 | 6.883547  | 0.876878  | 6              | -2.781408 | -1.003974 | -2.572969 |
| 17 | -6.168316 | -1.191977 | 1.624226  | 8              | -1.692605 | -3.072861 | -1.882111 |
| 1  | 1.906080  | -3.832051 | 0.123419  | 6              | -1.566039 | -0.377631 | -2.942580 |
| 1  | 1.494005  | -3.049220 | -1.435271 | 6              | -0.609705 | -1.051603 | -3.741426 |
| 1  | 2.266056  | -2.831572 | 3.497817  | 6              | -3.958257 | -0.195560 | -2.236190 |
| 1  | 1.201033  | -3.626905 | 2.222435  | 6              | -5.249005 | -0.763365 | -2.266938 |
| 46 | 0.291395  | -1.120932 | 2.931874  | 6              | -3.849331 | 1.169616  | -1.894904 |
| 15 | -1.319062 | -0.698506 | 4.532624  | 6              | -6.370931 | -0.008251 | -1.949879 |
| 6  | -0.624877 | -0.386244 | 6.198977  | 1              | -5.375727 | -1.807721 | -2.542576 |
| 6  | 0.670032  | 0.143708  | 6.275377  | 6              | -4.974173 | 1.918170  | -1.572918 |
| 6  | -1.333923 | -0.621877 | 7.382996  | 1              | -2.871822 | 1.644461  | -1.835799 |
| 6  | 1.240985  | 0.445530  | 7.508751  | 6              | -6.240831 | 1.334161  | -1.593902 |
| 1  | 1.228984  | 0.312622  | 5.351458  | 1              | -7.354937 | -0.473102 | -1.978361 |
| 6  | -0.756729 | -0.331940 | 8.617637  | 1              | -4.858525 | 2.963107  | -1.287647 |
| 1  | -2.344917 | -1.027688 | 7.340154  | 1              | -7.120179 | 1.921826  | -1.337113 |
| 6  | 0.528275  | 0.204291  | 8.682622  | 6              | -3.094838 | 0.318154  | 1.187008  |
| 1  | 2.247139  | 0.858987  | 7.554314  | 6              | -2.372719 | -1.753711 | 0.102155  |
| 1  | -1.315293 | -0.523623 | 9.532438  | 6              | -3.751152 | -1.720927 | 0.483905  |
| 1  | 0.976622  | 0.429361  | 9.648876  | 7              | -4.100843 | -0.502569 | 1.099101  |
| 6  | -2.295297 | 0.817743  | 4.192440  | 8              | -4.578291 | -2.637560 | 0.281227  |
| 6  | -2.495169 | 1.845673  | 5.120298  | 16             | -1.558669 | -0.288211 | 0.554789  |
| 6  | -2.849325 | 0.944887  | 2.909761  | 6              | -1.728976 | -2.982246 | -0.425493 |
| 6  | -3.237532 | 2.974140  | 4.771589  | 6              | -0.319550 | -3.186355 | 0.057923  |
| 1  | -2.076352 | 1.766660  | 6.123092  | 6              | -0.073683 | -3.941951 | 1.206693  |
| 6  | -3.606136 | 2.061631  | 2.569461  | 6              | 0.757766  | -2.570532 | -0.585948 |

|    |           |           |            |                |           |           |            |
|----|-----------|-----------|------------|----------------|-----------|-----------|------------|
| 6  | 1.214807  | -4.083876 | 1.712596   | 1              | 0.063280  | -5.580485 | -6.230167  |
| 1  | -0.904272 | -4.427443 | 1.718446   | 1              | 1.442124  | -5.608095 | -8.298462  |
| 6  | 2.054444  | -2.701411 | -0.098411  | 6              | -3.477257 | -1.494282 | -8.036885  |
| 1  | 0.578795  | -1.978342 | -1.483290  | 6              | -3.587915 | -2.454096 | -9.049076  |
| 6  | 2.266166  | -3.458240 | 1.049821   | 6              | -4.605344 | -0.741371 | -7.676869  |
| 1  | 1.399918  | -4.674674 | 2.606267   | 6              | -4.807529 | -2.650495 | -9.694573  |
| 1  | 2.889158  | -2.220605 | -0.602409  | 1              | -2.720512 | -3.048244 | -9.335257  |
| 1  | -2.367538 | -3.813234 | -0.079650  | 6              | -5.817698 | -0.932031 | -8.331568  |
| 6  | -3.191391 | 1.667654  | 1.740334   | 1              | -4.525309 | -0.000811 | -6.877746  |
| 6  | -4.432136 | 2.129921  | 2.212587   | 6              | -5.920419 | -1.889811 | -9.340599  |
| 6  | -2.086345 | 2.530662  | 1.801465   | 1              | -4.886800 | -3.400460 | -10.479587 |
| 6  | -4.556181 | 3.411407  | 2.734761   | 1              | -6.685535 | -0.339348 | -8.048534  |
| 1  | -5.292545 | 1.466046  | 2.156832   | 1              | -6.870635 | -2.046450 | -9.847861  |
| 6  | -2.214436 | 3.811873  | 2.324126   | 1              | 0.256913  | -0.494763 | -4.097162  |
| 1  | -1.113576 | 2.199476  | 1.437506   | 1              | -0.472518 | -2.129423 | -3.661863  |
| 6  | -3.449530 | 4.258747  | 2.793956   | 1              | -1.465768 | 0.700320  | -2.830822  |
| 1  | -5.524413 | 3.753346  | 3.096622   |                |           |           |            |
| 1  | -1.345081 | 4.465630  | 2.363387   |                |           |           |            |
| 1  | -3.548823 | 5.262697  | 3.202705   |                |           |           |            |
| 17 | 3.896610  | -3.628137 | 1.674367   | <b>2-TS6-2</b> |           |           |            |
| 1  | -2.922286 | -2.980251 | -3.471851  | 6              | -2.993691 | -2.699666 | -1.818817  |
| 1  | -3.744446 | -2.814142 | -1.904714  | 6              | -2.946667 | -1.196683 | -1.701649  |
| 46 | -2.378732 | -0.847958 | -4.887650  | 8              | -1.774326 | -3.264515 | -1.379233  |
| 15 | -1.934859 | -1.161708 | -7.120154  | 6              | -1.814776 | -0.506014 | -2.276597  |
| 6  | -1.188416 | 0.273320  | -7.970089  | 6              | -1.036664 | -1.059976 | -3.302859  |
| 6  | -0.076850 | 0.885205  | -7.372660  | 6              | -4.156096 | -0.418232 | -1.398643  |
| 6  | -1.679919 | 0.778681  | -9.178838  | 6              | -5.419686 | -1.038261 | -1.291641  |
| 6  | 0.536936  | 1.975714  | -7.979671  | 6              | -4.091755 | 0.979369  | -1.196026  |
| 1  | 0.306746  | 0.500987  | -6.426416  | 6              | -6.553315 | -0.298408 | -0.978194  |
| 6  | -1.070261 | 1.880169  | -9.777385  | 1              | -5.522370 | -2.105910 | -1.464448  |
| 1  | -2.537648 | 0.309092  | -9.659166  | 6              | -5.226813 | 1.708390  | -0.866018  |
| 6  | 0.037153  | 2.478617  | -9.181415  | 1              | -3.141285 | 1.503082  | -1.270243  |
| 1  | 1.401485  | 2.440728  | -7.509105  | 6              | -6.464377 | 1.074697  | -0.752943  |
| 1  | -1.461747 | 2.267208  | -10.716434 | 1              | -7.516373 | -0.801295 | -0.908145  |
| 1  | 0.511577  | 3.338220  | -9.651410  | 1              | -5.142175 | 2.779792  | -0.690688  |
| 6  | -0.822344 | -2.550977 | -7.514359  | 1              | -7.353447 | 1.648204  | -0.497624  |
| 6  | -0.040414 | -2.571202 | -8.676273  | 6              | -2.732217 | 0.288736  | 1.787255   |
| 6  | -0.773914 | -3.639529 | -6.634157  | 6              | -2.202380 | -1.723449 | 0.474822   |
| 6  | 0.770602  | -3.668341 | -8.954871  | 6              | -3.487955 | -1.724931 | 1.153112   |
| 1  | -0.069841 | -1.727544 | -9.366457  | 7              | -3.750137 | -0.517865 | 1.820436   |
| 6  | 0.032225  | -4.738548 | -6.919401  | 8              | -4.300642 | -2.659475 | 1.100572   |
| 1  | -1.370617 | -3.616073 | -5.719720  | 16             | -1.292558 | -0.303909 | 0.932022   |
| 6  | 0.806555  | -4.752211 | -8.078824  | 6              | -1.597074 | -3.027137 | 0.033184   |
| 1  | 1.375837  | -3.676126 | -9.859447  | 6              | -0.134129 | -3.169996 | 0.350360   |
|    |           |           |            | 6              | 0.258584  | -3.689161 | 1.586274   |
|    |           |           |            | 6              | 0.847594  | -2.740583 | -0.545801  |



|    |           |           |            |                |           |           |           |
|----|-----------|-----------|------------|----------------|-----------|-----------|-----------|
| 6  | 1.602586  | -3.783085 | 1.931256   | 1              | -2.627090 | -5.269573 | -6.805071 |
| 1  | -0.498945 | -4.027070 | 2.293203   | 1              | -2.263230 | -5.124725 | -9.261235 |
| 6  | 2.198059  | -2.828446 | -0.220756  | 6              | -5.569795 | -0.556741 | -6.245674 |
| 1  | 0.551994  | -2.336669 | -1.513329  | 6              | -6.321952 | -1.187776 | -7.243623 |
| 6  | 2.558750  | -3.350163 | 1.017501   | 6              | -6.234729 | 0.067055  | -5.179825 |
| 1  | 1.903637  | -4.191157 | 2.892840   | 6              | -7.713909 | -1.185392 | -7.179537 |
| 1  | 2.960024  | -2.494897 | -0.920846  | 1              | -5.816829 | -1.681823 | -8.073965 |
| 1  | -2.169526 | -3.805641 | 0.566467   | 6              | -7.625498 | 0.076609  | -5.122356 |
| 6  | -2.746973 | 1.626019  | 2.374016   | 1              | -5.648600 | 0.541191  | -4.386233 |
| 6  | -3.953076 | 2.125182  | 2.893997   | 6              | -8.366357 | -0.551620 | -6.122925 |
| 6  | -1.599189 | 2.431170  | 2.426047   | 1              | -8.290466 | -1.680383 | -7.959116 |
| 6  | -4.004506 | 3.395435  | 3.451828   | 1              | -8.131445 | 0.566883  | -4.292390 |
| 1  | -4.841647 | 1.499352  | 2.846783   | 1              | -9.453865 | -0.552869 | -6.075435 |
| 6  | -1.654777 | 3.701189  | 2.987090   | 1              | -0.192054 | -0.492149 | -3.691331 |
| 1  | -0.651583 | 2.061497  | 2.034390   | 1              | -0.999001 | -2.134742 | -3.476740 |
| 6  | -2.856946 | 4.188058  | 3.500012   | 1              | -1.607745 | 0.516949  | -1.966642 |
| 1  | -4.945123 | 3.772439  | 3.848620   |                |           |           |           |
| 1  | -0.756157 | 4.313494  | 3.023927   |                |           |           |           |
| 1  | -2.899189 | 5.183980  | 3.937148   |                |           |           |           |
| 17 | 4.257505  | -3.472904 | 1.432118   | <b>2-IM8-2</b> |           |           |           |
| 1  | -3.114631 | -3.021233 | -2.862711  | 6              | 3.362374  | -2.398215 | -1.914549 |
| 1  | -3.831462 | -3.106114 | -1.235151  | 6              | 3.165830  | -1.667653 | -0.581359 |
| 46 | -2.970114 | -0.444315 | -4.072286  | 8              | 2.273500  | -1.977702 | -2.714966 |
| 15 | -3.738765 | -0.502569 | -6.236046  | 6              | 2.061319  | -2.321427 | 0.242174  |
| 6  | -3.324233 | 0.936445  | -7.288270  | 6              | 1.196652  | -3.328497 | -0.170985 |
| 6  | -2.052370 | 1.509235  | -7.146267  | 6              | 4.405763  | -1.667051 | 0.302041  |
| 6  | -4.213442 | 1.476089  | -8.225451  | 6              | 5.396286  | -2.645036 | 0.131943  |
| 6  | -1.673919 | 2.593024  | -7.933889  | 6              | 4.533475  | -0.773296 | 1.371537  |
| 1  | -1.359129 | 1.100728  | -6.408402  | 6              | 6.490180  | -2.713315 | 0.995093  |
| 6  | -3.835389 | 2.565844  | -9.007222  | 1              | 5.324510  | -3.355782 | -0.690210 |
| 1  | -5.205154 | 1.041258  | -8.348515  | 6              | 5.630277  | -0.832808 | 2.228301  |
| 6  | -2.566682 | 3.124424  | -8.864122  | 1              | 3.764187  | -0.020062 | 1.545183  |
| 1  | -0.683837 | 3.029484  | -7.814368  | 6              | 6.613609  | -1.803947 | 2.043174  |
| 1  | -4.535778 | 2.978347  | -9.731340  | 1              | 7.246063  | -3.483624 | 0.844273  |
| 1  | -2.275305 | 3.977694  | -9.473907  | 1              | 5.714589  | -0.116871 | 3.044274  |
| 6  | -3.248117 | -1.945869 | -7.248415  | 1              | 7.468077  | -1.855060 | 2.716091  |
| 6  | -3.039741 | -1.872992 | -8.630708  | 6              | 2.603658  | 2.012592  | 0.039283  |
| 6  | -3.087815 | -3.177895 | -6.598800  | 6              | 2.732648  | -0.242609 | -1.123542 |
| 6  | -2.685003 | -3.013038 | -9.349373  | 6              | 3.925931  | 0.732819  | -1.222621 |
| 1  | -3.158105 | -0.922511 | -9.150837  | 7              | 3.760513  | 1.935122  | -0.557087 |
| 6  | -2.745255 | -4.317752 | -7.320256  | 8              | 4.912771  | 0.440790  | -1.877011 |
| 1  | -3.231237 | -3.235745 | -5.517482  | 16             | 1.517451  | 0.625456  | -0.082107 |
| 6  | -2.540357 | -4.235879 | -8.697355  | 6              | 2.246042  | -0.568373 | -2.600980 |
| 1  | -2.523118 | -2.944081 | -10.423793 | 6              | 0.906716  | -0.034964 | -3.002007 |
|    |           |           |            | 6              | 0.818405  | 1.232624  | -3.580255 |
|    |           |           |            | 6              | -0.262808 | -0.759656 | -2.763263 |

|    |           |           |           |                |           |            |           |
|----|-----------|-----------|-----------|----------------|-----------|------------|-----------|
| 6  | -0.415305 | 1.781108  | -3.914527 | 1              | -0.627798 | -8.442200  | 2.366892  |
| 1  | 1.727638  | 1.803250  | -3.771601 | 1              | 0.036307  | -9.654518  | 4.435075  |
| 6  | -1.505495 | -0.231325 | -3.097386 | 6              | 4.636724  | -7.304346  | 0.671822  |
| 1  | -0.199509 | -1.749404 | -2.313456 | 6              | 4.713196  | -8.686817  | 0.880036  |
| 6  | -1.564965 | 1.037513  | -3.667185 | 6              | 5.321725  | -6.744217  | -0.415658 |
| 1  | -0.482542 | 2.766946  | -4.366940 | 6              | 5.461313  | -9.489023  | 0.020160  |
| 1  | -2.416591 | -0.795828 | -2.915352 | 1              | 4.188955  | -9.142128  | 1.720088  |
| 1  | 3.022506  | -0.144724 | -3.259973 | 6              | 6.077194  | -7.544365  | -1.267637 |
| 6  | 2.209164  | 3.180247  | 0.817189  | 1              | 5.254094  | -5.668467  | -0.591778 |
| 6  | 3.133499  | 4.226120  | 0.984118  | 6              | 6.145808  | -8.920439  | -1.052233 |
| 6  | 0.942398  | 3.282075  | 1.413745  | 1              | 5.509820  | -10.563225 | 0.191493  |
| 6  | 2.796010  | 5.343031  | 1.734491  | 1              | 6.604579  | -7.093708  | -2.106782 |
| 1  | 4.112944  | 4.141192  | 0.520133  | 1              | 6.728911  | -9.549311  | -1.722737 |
| 6  | 0.609404  | 4.403450  | 2.161923  | 1              | 1.832582  | -1.791633  | 1.170442  |
| 1  | 0.207738  | 2.486924  | 1.290437  | 1              | 1.185519  | -3.700573  | -1.194978 |
| 6  | 1.535088  | 5.433912  | 2.325606  | 1              | 0.296762  | -3.530319  | 0.409814  |
| 1  | 3.518825  | 6.146027  | 1.861988  |                |           |            |           |
| 1  | -0.374915 | 4.474480  | 2.619178  |                |           |            |           |
| 1  | 1.272554  | 6.310566  | 2.914512  | <b>2-IM7-3</b> |           |            |           |
| 17 | -3.124970 | 1.711589  | -4.090923 | 46             | 3.292636  | 0.125790   | -1.844062 |
| 1  | 3.316572  | -3.489805 | -1.822165 | 15             | 3.655604  | 1.572612   | -3.624162 |
| 1  | 4.320212  | -2.111418 | -2.376951 | 6              | 5.416711  | 1.654129   | -4.108594 |
| 46 | 2.856108  | -4.223808 | 0.907922  | 6              | 6.180471  | 0.484377   | -3.991496 |
| 15 | 3.701161  | -6.166712 | 1.764114  | 6              | 6.018428  | 2.812109   | -4.614696 |
| 6  | 4.936977  | -5.678454 | 3.030454  | 6              | 7.516717  | 0.468878   | -4.381834 |
| 6  | 4.611792  | -4.577159 | 3.838206  | 1              | 5.716219  | -0.416608  | -3.584353 |
| 6  | 6.178415  | -6.301362 | 3.201847  | 6              | 7.359602  | 2.798041   | -4.992815 |
| 6  | 5.499796  | -4.120751 | 4.807483  | 1              | 5.441169  | 3.730988   | -4.713526 |
| 1  | 3.654540  | -4.071003 | 3.685843  | 6              | 8.108791  | 1.628271   | -4.881065 |
| 6  | 7.073831  | -5.832433 | 4.163043  | 1              | 8.097150  | -0.447462  | -4.289619 |
| 1  | 6.449556  | -7.157071 | 2.583355  | 1              | 7.818503  | 3.706124   | -5.380301 |
| 6  | 6.736397  | -4.745918 | 4.967792  | 1              | 9.155894  | 1.621513   | -5.177908 |
| 1  | 5.234520  | -3.263662 | 5.424639  | 6              | 2.780532  | 1.202753   | -5.183240 |
| 1  | 8.038315  | -6.322914 | 4.285058  | 6              | 3.445522  | 0.782734   | -6.341515 |
| 1  | 7.439112  | -4.381322 | 5.715087  | 6              | 1.379712  | 1.300208   | -5.194289 |
| 6  | 2.564762  | -7.282032 | 2.670691  | 6              | 2.723320  | 0.473491   | -7.493083 |
| 6  | 2.930146  | -7.967419 | 3.835983  | 1              | 4.531847  | 0.703104   | -6.353189 |
| 6  | 1.273848  | -7.458250 | 2.154222  | 6              | 0.665780  | 0.998152   | -6.349011 |
| 6  | 2.021993  | -8.815357 | 4.467242  | 1              | 0.853768  | 1.608136   | -4.289226 |
| 1  | 3.931122  | -7.840715 | 4.249466  | 6              | 1.335067  | 0.583008   | -7.501035 |
| 6  | 0.371127  | -8.313083 | 2.780125  | 1              | 3.253043  | 0.154624   | -8.389301 |
| 1  | 0.979505  | -6.911194 | 1.256606  | 1              | -0.419697 | 1.083692   | -6.348818 |
| 6  | 0.743685  | -8.991687 | 3.939652  | 1              | 0.773314  | 0.345096   | -8.402731 |
| 1  | 2.315527  | -9.343511 | 5.372994  | 6              | 3.179390  | 3.299005   | -3.257920 |
|    |           |           |           | 6              | 2.870265  | 4.228190   | -4.261026 |

|    |           |           |           |                |           |           |           |
|----|-----------|-----------|-----------|----------------|-----------|-----------|-----------|
| 6  | 3.144640  | 3.706621  | -1.917872 | 6              | -1.256874 | 3.364400  | -1.114065 |
| 6  | 2.552471  | 5.542653  | -3.925740 | 6              | -0.761431 | 4.262516  | -2.075412 |
| 1  | 2.883136  | 3.924338  | -5.307627 | 6              | -2.187609 | 3.831794  | -0.173279 |
| 6  | 2.830116  | 5.021542  | -1.585082 | 6              | -1.186130 | 5.584904  | -2.090679 |
| 1  | 3.350598  | 2.976700  | -1.132768 | 1              | -0.042338 | 3.903321  | -2.810230 |
| 6  | 2.537685  | 5.942360  | -2.589817 | 6              | -2.610072 | 5.155656  | -0.193073 |
| 1  | 2.317150  | 6.257479  | -4.712598 | 1              | -2.579992 | 3.156938  | 0.587884  |
| 1  | 2.801372  | 5.322742  | -0.539385 | 6              | -2.111951 | 6.038647  | -1.151113 |
| 1  | 2.284027  | 6.969157  | -2.331613 | 1              | -0.794700 | 6.266399  | -2.844660 |
| 6  | 0.974660  | -1.878379 | 1.667426  | 1              | -3.330317 | 5.501384  | 0.546066  |
| 6  | 1.593020  | -0.508192 | 1.642210  | 1              | -2.443523 | 7.075132  | -1.164826 |
| 8  | -0.334702 | -1.980492 | 1.113359  | 17             | -4.846951 | -5.325618 | -2.387547 |
| 6  | 0.929246  | 0.513092  | 2.417132  | 1              | 0.843151  | -2.187083 | 2.713196  |
| 6  | -0.177236 | 0.341827  | 3.167473  | 1              | 1.620677  | -2.631331 | 1.197926  |
| 1  | 1.333788  | 1.523465  | 2.357992  | 1              | -0.621410 | 1.178603  | 3.702366  |
| 6  | 2.802852  | -0.254363 | 0.988283  | 1              | -0.681221 | -0.618116 | 3.262383  |
| 6  | 3.389625  | -1.191448 | 0.043056  |                |           |           |           |
| 6  | 3.535299  | 0.979148  | 1.170684  | <b>2-TS6-3</b> |           |           |           |
| 6  | 4.631489  | -0.961947 | -0.576337 | 6              | -1.932648 | -2.217298 | 2.760859  |
| 1  | 2.942479  | -2.174039 | -0.080446 | 6              | -1.556122 | -0.757802 | 2.750241  |
| 6  | 4.628096  | 1.282327  | 0.411780  | 8              | -3.235402 | -2.394730 | 2.245765  |
| 1  | 3.223069  | 1.679827  | 1.939947  | 6              | -2.464232 | 0.137322  | 3.472699  |
| 6  | 5.119496  | 0.370703  | -0.590874 | 6              | -3.527685 | -0.236681 | 4.200818  |
| 1  | 5.132454  | -1.754147 | -1.129407 | 1              | -2.229795 | 1.199434  | 3.444397  |
| 1  | 5.140155  | 2.233638  | 0.549672  | 6              | -0.159177 | -0.383970 | 2.683993  |
| 1  | 6.044541  | 0.602290  | -1.116379 | 6              | 0.863422  | -1.377742 | 2.473415  |
| 6  | -0.791615 | 1.980967  | -1.126467 | 6              | 0.258121  | 0.962006  | 2.795907  |
| 6  | -0.376494 | -0.395892 | -0.721828 | 6              | 2.241817  | -1.008925 | 2.457988  |
| 6  | 0.421487  | 0.193165  | -1.709790 | 1              | 0.625801  | -2.429996 | 2.610859  |
| 7  | 0.184590  | 1.551444  | -1.883310 | 6              | 1.598117  | 1.322719  | 2.698932  |
| 8  | 1.290926  | -0.429859 | -2.438750 | 1              | -0.474178 | 1.752765  | 2.936541  |
| 16 | -1.524139 | 0.744591  | -0.110988 | 6              | 2.589791  | 0.353742  | 2.513771  |
| 6  | -0.362740 | -1.825757 | -0.307962 | 1              | 3.011629  | -1.774204 | 2.547195  |
| 6  | -1.522404 | -2.664597 | -0.817861 | 1              | 1.875986  | 2.373411  | 2.761607  |
| 6  | -2.167016 | -2.364174 | -2.020543 | 1              | 3.638746  | 0.643885  | 2.453725  |
| 6  | -1.918893 | -3.804464 | -0.112150 | 6              | -1.884449 | 1.410657  | -0.526232 |
| 6  | -3.186267 | -3.175794 | -2.512271 | 6              | -2.432659 | -0.674907 | 0.705997  |
| 1  | -1.873411 | -1.479418 | -2.585116 | 6              | -1.298587 | -0.717626 | -0.206712 |
| 6  | -2.937779 | -4.625414 | -0.583104 | 7              | -1.001011 | 0.494788  | -0.812548 |
| 1  | -1.425788 | -4.047311 | 0.825315  | 8              | -0.600125 | -1.744088 | -0.397760 |
| 6  | -3.560871 | -4.299275 | -1.782723 | 16             | -3.212513 | 0.900521  | 0.520697  |
| 1  | -3.685723 | -2.934385 | -3.447439 | 6              | -3.247537 | -1.949606 | 0.891470  |
| 1  | -3.243231 | -5.506485 | -0.024127 | 6              | -4.681402 | -1.830404 | 0.453482  |
| 1  | 0.570903  | -2.247419 | -0.730731 | 6              | -5.045945 | -2.127919 | -0.860804 |







|    |           |           |           |                |           |           |           |
|----|-----------|-----------|-----------|----------------|-----------|-----------|-----------|
| 6  | -4.736036 | -0.470325 | 4.540025  | 1              | 0.333549  | -2.199144 | -1.603759 |
| 6  | -2.821831 | -1.843468 | 3.999736  | 6              | -1.344256 | 3.306433  | -0.995332 |
| 6  | -5.254118 | -1.501620 | 5.317128  | 6              | -0.370235 | 4.307629  | -1.143913 |
| 1  | -5.290356 | 0.463361  | 4.441924  | 6              | -2.532419 | 3.602730  | -0.310036 |
| 6  | -3.344555 | -2.875666 | 4.776144  | 6              | -0.574512 | 5.568234  | -0.597151 |
| 1  | -1.881241 | -1.981721 | 3.465169  | 1              | 0.554009  | 4.069421  | -1.668005 |
| 6  | -4.560310 | -2.705687 | 5.435249  | 6              | -2.738373 | 4.871224  | 0.220061  |
| 1  | -6.207104 | -1.367374 | 5.825868  | 1              | -3.303381 | 2.838210  | -0.197454 |
| 1  | -2.807424 | -3.820141 | 4.850386  | 6              | -1.757149 | 5.854202  | 0.085841  |
| 1  | -4.972641 | -3.514598 | 6.035879  | 1              | 0.195348  | 6.330862  | -0.701693 |
| 6  | 1.518721  | -0.526930 | 0.214450  | 1              | -3.665880 | 5.092025  | 0.746019  |
| 6  | 1.701532  | 0.611025  | 1.187254  | 1              | -1.914906 | 6.842805  | 0.512988  |
| 8  | 0.330418  | -1.247885 | 0.428377  | 17             | -4.453841 | -5.368039 | 1.617616  |
| 6  | 1.084131  | 0.636375  | 2.411625  | 1              | 2.377533  | -1.223211 | 0.259856  |
| 6  | 0.178136  | -0.343837 | 2.979683  | 1              | 1.526494  | -0.105672 | -0.802951 |
| 1  | 1.212923  | 1.544176  | 3.004048  | 1              | -0.141619 | -0.129212 | 4.002360  |
| 6  | 2.517236  | 1.743258  | 0.725863  | 1              | 0.400115  | -1.402271 | 2.818593  |
| 6  | 3.488654  | 1.568543  | -0.279397 |                |           |           |           |
| 6  | 2.327417  | 3.047838  | 1.224839  |                |           |           |           |
| 6  | 4.247457  | 2.638600  | -0.742435 | <b>3-IM5-N</b> |           |           |           |
| 1  | 3.669579  | 0.576673  | -0.691512 | 46             | -0.723484 | -0.206162 | -0.773017 |
| 6  | 3.083358  | 4.115482  | 0.757681  | 15             | -2.390699 | -1.608716 | -0.218828 |
| 1  | 1.549971  | 3.235110  | 1.964410  | 6              | -2.280498 | -3.335791 | -0.803631 |
| 6  | 4.052019  | 3.918408  | -0.226941 | 6              | -2.904471 | -4.394323 | -0.129140 |
| 1  | 4.997605  | 2.469549  | -1.513141 | 6              | -1.547133 | -3.606034 | -1.965799 |
| 1  | 2.900987  | 5.113940  | 1.153368  | 6              | -2.803296 | -5.694626 | -0.616838 |
| 1  | 4.641918  | 4.756172  | -0.594326 | 1              | -3.470252 | -4.198538 | 0.782106  |
| 6  | -1.053491 | 1.965534  | -1.490016 | 6              | -1.449320 | -4.906499 | -2.453615 |
| 6  | -0.901118 | -0.509376 | -1.734058 | 1              | -1.037181 | -2.789640 | -2.478718 |
| 6  | 0.020904  | 0.264009  | -2.542221 | 6              | -2.078304 | -5.952159 | -1.779944 |
| 7  | -0.137088 | 1.670875  | -2.346345 | 1              | -3.291866 | -6.509741 | -0.085999 |
| 8  | 0.873205  | -0.191068 | -3.309271 | 1              | -0.872218 | -5.103962 | -3.355699 |
| 16 | -1.991289 | 0.568042  | -0.853915 | 1              | -1.997766 | -6.970351 | -2.156611 |
| 6  | -0.508057 | -1.714267 | -1.100340 | 6              | -2.549174 | -1.777161 | 1.594220  |
| 6  | -1.489757 | -2.641621 | -0.477979 | 6              | -3.620694 | -1.245880 | 2.320762  |
| 6  | -2.864978 | -2.518976 | -0.706847 | 6              | -1.478266 | -2.365262 | 2.286003  |
| 6  | -1.047496 | -3.659650 | 0.380459  | 6              | -3.618409 | -1.298983 | 3.714525  |
| 6  | -3.781836 | -3.352859 | -0.071249 | 1              | -4.460734 | -0.785271 | 1.801596  |
| 1  | -3.237547 | -1.773228 | -1.407407 | 6              | -1.484818 | -2.425405 | 3.674819  |
| 6  | -1.944936 | -4.502986 | 1.022115  | 1              | -0.630803 | -2.763009 | 1.725535  |
| 1  | 0.018297  | -3.772347 | 0.566320  | 6              | -2.553320 | -1.885855 | 4.393261  |
| 6  | -3.309655 | -4.329379 | 0.797239  | 1              | -4.456621 | -0.880555 | 4.269391  |
| 1  | -4.847826 | -3.243185 | -0.255453 | 1              | -0.651076 | -2.889462 | 4.199059  |
| 1  | -1.591794 | -5.281827 | 1.693844  | 1              | -2.554109 | -1.924872 | 5.481140  |
|    |           |           |           | 6              | -4.034532 | -1.014669 | -0.758915 |

|    |           |           |           |                |           |           |           |
|----|-----------|-----------|-----------|----------------|-----------|-----------|-----------|
| 6  | -5.102903 | -1.867097 | -1.058987 | 1              | 8.455253  | -2.535866 | -1.421445 |
| 6  | -4.223614 | 0.372281  | -0.843065 | 1              | 8.039127  | 1.163119  | 0.749543  |
| 6  | -6.337280 | -1.340311 | -1.434280 | 1              | 3.973997  | -2.474742 | -0.305772 |
| 1  | -4.972673 | -2.947663 | -1.004595 | 6              | 0.553356  | 1.723530  | 1.926184  |
| 6  | -5.460602 | 0.896709  | -1.206039 | 6              | 1.118295  | 2.966525  | 2.250551  |
| 1  | -3.384377 | 1.037358  | -0.623693 | 6              | -0.822845 | 1.518335  | 2.138001  |
| 6  | -6.518891 | 0.039667  | -1.505675 | 6              | 0.324319  | 3.984041  | 2.763109  |
| 1  | -7.160245 | -2.012131 | -1.672156 | 1              | 2.179533  | 3.150672  | 2.084651  |
| 1  | -5.595371 | 1.975326  | -1.264795 | 6              | -1.610242 | 2.538170  | 2.652668  |
| 1  | -7.484000 | 0.447066  | -1.801845 | 1              | -1.258545 | 0.548762  | 1.900483  |
| 6  | 1.589624  | 0.977539  | -2.083172 | 6              | -1.040355 | 3.774356  | 2.963185  |
| 6  | 1.291558  | -0.109864 | -3.094180 | 1              | 0.771155  | 4.946150  | 3.003937  |
| 1  | 2.463723  | 0.615203  | -1.485082 | 1              | -2.673243 | 2.367767  | 2.816204  |
| 1  | 1.995990  | 1.852895  | -2.638005 | 1              | -1.659981 | 4.574052  | 3.364652  |
| 8  | 0.548322  | 1.383331  | -1.297062 | 17             | 10.072369 | -0.327170 | -0.591194 |
| 6  | 0.014063  | -0.509831 | -3.350009 | 1              | -1.374989 | 1.089227  | -2.816776 |
| 6  | -1.223525 | 0.006526  | -2.756740 | 1              | -2.118731 | -0.533099 | -3.085173 |
| 1  | -0.108466 | -1.365898 | -4.020012 |                |           |           |           |
| 6  | 2.452790  | -0.799470 | -3.674823 | <b>3-TS5-N</b> |           |           |           |
| 6  | 2.404032  | -2.162361 | -4.029692 | 46             | -0.453826 | -0.387023 | -0.093089 |
| 6  | 3.691328  | -0.141653 | -3.809387 | 15             | -1.930891 | -2.048096 | -0.133927 |
| 6  | 3.527530  | -2.825453 | -4.508697 | 6              | -1.458305 | -3.485351 | -1.151898 |
| 1  | 1.476226  | -2.718324 | -3.892558 | 6              | -1.788978 | -4.799841 | -0.798229 |
| 6  | 4.816199  | -0.807473 | -4.286233 | 6              | -0.733203 | -3.254570 | -2.327529 |
| 1  | 3.771595  | 0.912690  | -3.548011 | 6              | -1.400330 | -5.861868 | -1.611856 |
| 6  | 4.743285  | -2.153698 | -4.640118 | 1              | -2.347119 | -4.992988 | 0.117849  |
| 1  | 3.457626  | -3.881598 | -4.766135 | 6              | -0.347866 | -4.316924 | -3.139824 |
| 1  | 5.758636  | -0.268991 | -4.380515 | 1              | -0.458423 | -2.233534 | -2.593854 |
| 1  | 5.624912  | -2.676181 | -5.007861 | 6              | -0.679925 | -5.622591 | -2.780864 |
| 6  | 1.354207  | 0.643728  | 1.377724  | 1              | -1.659326 | -6.880477 | -1.328728 |
| 6  | 3.195079  | -0.829309 | 0.618353  | 1              | 0.221335  | -4.124429 | -4.047765 |
| 6  | 1.817651  | -1.374527 | 0.474546  | 1              | -0.372127 | -6.456007 | -3.409789 |
| 7  | 0.844382  | -0.463408 | 0.902468  | 6              | -2.092457 | -2.696845 | 1.563664  |
| 8  | 1.555945  | -2.477397 | 0.011691  | 6              | -3.242309 | -2.496471 | 2.336090  |
| 16 | 3.122229  | 0.755328  | 1.362997  | 6              | -0.968162 | -3.303687 | 2.147022  |
| 6  | 4.257366  | -1.510979 | 0.124800  | 6              | -3.267040 | -2.895471 | 3.671796  |
| 6  | 5.655559  | -1.176225 | 0.013252  | 1              | -4.122414 | -2.025918 | 1.899229  |
| 6  | 6.482699  | -2.080221 | -0.684343 | 6              | -1.003768 | -3.710201 | 3.476575  |
| 6  | 6.246133  | -0.005550 | 0.527928  | 1              | -0.056551 | -3.429583 | 1.559385  |
| 6  | 7.832136  | -1.831637 | -0.876774 | 6              | -2.151027 | -3.501453 | 4.243930  |
| 1  | 6.043838  | -2.991077 | -1.089171 | 1              | -4.166058 | -2.733122 | 4.264031  |
| 6  | 7.595195  | 0.256546  | 0.347153  | 1              | -0.128174 | -4.182168 | 3.919438  |
| 1  | 5.660374  | 0.719558  | 1.087974  | 1              | -2.172806 | -3.810974 | 5.287193  |
| 6  | 8.375622  | -0.658762 | -0.357426 | 6              | -3.629451 | -1.613979 | -0.639579 |



|    |           |           |           |                |           |           |           |
|----|-----------|-----------|-----------|----------------|-----------|-----------|-----------|
| 6  | -4.523467 | -2.556005 | -1.161848 | 1              | 8.673738  | -1.916844 | -1.815629 |
| 6  | -4.057593 | -0.295044 | -0.443368 | 1              | 8.040131  | 1.744854  | 0.361889  |
| 6  | -5.827577 | -2.181326 | -1.477755 | 1              | 4.364229  | -2.391235 | -0.206323 |
| 1  | -4.201578 | -3.585017 | -1.322067 | 6              | 0.839244  | 1.132017  | 2.801551  |
| 6  | -5.364440 | 0.074189  | -0.750476 | 6              | 1.275265  | 2.374350  | 3.275141  |
| 1  | -3.353047 | 0.438672  | -0.046556 | 6              | -0.292009 | 0.538410  | 3.374741  |
| 6  | -6.249735 | -0.869249 | -1.269577 | 6              | 0.602212  | 3.007335  | 4.312845  |
| 1  | -6.516276 | -2.918152 | -1.887148 | 1              | 2.142208  | 2.856006  | 2.820642  |
| 1  | -5.689200 | 1.100868  | -0.590976 | 6              | -0.968344 | 1.177751  | 4.411252  |
| 1  | -7.269588 | -0.580756 | -1.517848 | 1              | -0.628618 | -0.429909 | 3.005020  |
| 6  | 1.469654  | 1.912580  | -0.755139 | 6              | -0.522453 | 2.410133  | 4.884737  |
| 6  | 1.487379  | 0.986874  | -1.951176 | 1              | 0.954621  | 3.970505  | 4.676963  |
| 1  | 2.495810  | 2.154482  | -0.441814 | 1              | -1.843770 | 0.703884  | 4.853175  |
| 1  | 0.990172  | 2.869770  | -1.021502 | 1              | -1.048129 | 2.906033  | 5.698635  |
| 8  | 0.743480  | 1.408975  | 0.352371  | 17             | 10.073157 | 0.505411  | -1.226094 |
| 6  | 0.322418  | 0.428286  | -2.403952 | 1              | -1.253111 | 1.577206  | -1.426752 |
| 6  | -1.002858 | 0.583530  | -1.820791 | 1              | -1.819685 | 0.166643  | -2.415465 |
| 1  | 0.399356  | -0.269385 | -3.241410 |                |           |           |           |
| 6  | 2.777593  | 0.663107  | -2.570526 | <b>3-IM6-N</b> |           |           |           |
| 6  | 3.018016  | -0.606565 | -3.133628 | 46             | -1.298053 | -0.349038 | -0.859415 |
| 6  | 3.832857  | 1.595377  | -2.589745 | 15             | -3.337263 | -0.119723 | 0.172013  |
| 6  | 4.245814  | -0.919543 | -3.703585 | 6              | -4.036859 | -1.739613 | 0.643287  |
| 1  | 2.240770  | -1.369591 | -3.080724 | 6              | -4.954264 | -1.872023 | 1.693931  |
| 6  | 5.059630  | 1.281567  | -3.167609 | 6              | -3.664480 | -2.875488 | -0.088108 |
| 1  | 3.680830  | 2.590805  | -2.174194 | 6              | -5.492962 | -3.119031 | 2.000434  |
| 6  | 5.273131  | 0.025106  | -3.731142 | 1              | -5.249734 | -0.995302 | 2.270311  |
| 1  | 4.408087  | -1.914660 | -4.115743 | 6              | -4.208150 | -4.120122 | 0.218442  |
| 1  | 5.854294  | 2.026600  | -3.177535 | 1              | -2.938174 | -2.777172 | -0.896510 |
| 1  | 6.237272  | -0.223029 | -4.172376 | 6              | -5.122935 | -4.242886 | 1.262670  |
| 6  | 1.539570  | 0.451407  | 1.685060  | 1              | -6.205682 | -3.212523 | 2.817916  |
| 6  | 3.499422  | -0.839595 | 0.794547  | 1              | -3.911792 | -4.996234 | -0.355443 |
| 6  | 2.180767  | -1.560001 | 0.796680  | 1              | -5.544480 | -5.216557 | 1.506227  |
| 7  | 1.179729  | -0.825854 | 1.374075  | 6              | -3.394733 | 0.856204  | 1.712910  |
| 8  | 2.041470  | -2.685995 | 0.314405  | 6              | -4.392797 | 1.805165  | 1.964993  |
| 16 | 3.333668  | 0.710747  | 1.588640  | 6              | -2.396277 | 0.633195  | 2.672211  |
| 6  | 4.574901  | -1.395784 | 0.192328  | 6              | -4.394927 | 2.518921  | 3.161608  |
| 6  | 5.909226  | -0.899231 | -0.062380 | 1              | -5.175965 | 1.985342  | 1.229560  |
| 6  | 6.761811  | -1.703426 | -0.845192 | 6              | -2.409623 | 1.342820  | 3.870049  |
| 6  | 6.402963  | 0.345916  | 0.372071  | 1              | -1.591407 | -0.077314 | 2.467280  |
| 6  | 8.034307  | -1.286696 | -1.203371 | 6              | -3.405975 | 2.288456  | 4.115427  |
| 1  | 6.401436  | -2.671569 | -1.191128 | 1              | -5.173993 | 3.256334  | 3.347027  |
| 6  | 7.674525  | 0.779173  | 0.022549  | 1              | -1.628228 | 1.168302  | 4.608114  |
| 1  | 5.795302  | 1.000712  | 0.992379  | 1              | -3.406691 | 2.850247  | 5.048071  |
| 6  | 8.476351  | -0.039397 | -0.769799 | 6              | -4.590315 | 0.653243  | -0.907330 |





|    |           |           |           |                |            |           |           |
|----|-----------|-----------|-----------|----------------|------------|-----------|-----------|
| 6  | -2.334588 | 0.612499  | -0.088532 | 6              | -3.032814  | -1.045548 | 4.177710  |
| 1  | -2.179776 | -1.546527 | -0.052021 | 1              | -3.515485  | -2.221218 | 2.439063  |
| 6  | -2.516731 | 1.735672  | -0.870510 | 6              | -3.382739  | 0.047843  | 4.971387  |
| 1  | -3.038365 | 2.477316  | -2.841364 | 1              | -4.792903  | 1.650909  | 5.268693  |
| 1  | -2.029913 | 0.706950  | 0.953876  | 1              | -2.146952  | -1.632562 | 4.414703  |
| 1  | -2.366668 | 2.728016  | -0.449147 | 1              | -2.770092  | 0.318158  | 5.829576  |
| 8  | -3.413236 | -2.179836 | -3.900097 | 6              | -7.189315  | 0.170788  | 1.102501  |
| 6  | -4.058647 | -3.449103 | -4.004660 | 6              | -8.328547  | 0.188854  | 1.918371  |
| 1  | -3.362120 | -4.185949 | -4.430066 | 6              | -7.026627  | 1.175105  | 0.138851  |
| 1  | -4.920362 | -3.325969 | -4.665590 | 6              | -9.283965  | 1.191326  | 1.770277  |
| 6  | -5.575605 | -2.943181 | -2.029287 | 1              | -8.464848  | -0.583987 | 2.675389  |
| 6  | -4.751195 | -5.251086 | -2.309243 | 6              | -7.979940  | 2.180789  | -0.005520 |
| 6  | -5.110407 | -5.671114 | -1.019758 | 1              | -6.144041  | 1.151089  | -0.506842 |
| 6  | -4.820740 | -6.173381 | -3.355591 | 6              | -9.110541  | 2.187937  | 0.809567  |
| 6  | -5.510344 | -6.978514 | -0.782146 | 1              | -10.166150 | 1.196192  | 2.408228  |
| 1  | -5.052087 | -4.965743 | -0.190602 | 1              | -7.843259  | 2.954318  | -0.759154 |
| 6  | -5.228836 | -7.487161 | -3.118827 | 1              | -9.860560  | 2.968524  | 0.694299  |
| 1  | -4.569826 | -5.879593 | -4.372461 |                |            |           |           |
| 6  | -5.573384 | -7.893480 | -1.834886 |                |            |           |           |
| 1  | -5.774173 | -7.286621 | 0.228178  | <b>3-IM7-2</b> |            |           |           |
| 1  | -5.280601 | -8.189220 | -3.949090 | 46             | -0.463262  | -1.627197 | -4.229911 |
| 1  | -5.892195 | -8.918052 | -1.651008 | 15             | -1.672862  | -1.795137 | -6.190189 |
| 1  | -6.166454 | -3.427097 | -1.251808 | 6              | -2.908200  | -3.134354 | -6.124569 |
| 6  | -6.084732 | -1.819745 | -2.617748 | 6              | -3.999673  | -3.195549 | -7.001661 |
| 1  | -7.047837 | -1.425227 | -2.295306 | 6              | -2.749397  | -4.132498 | -5.154819 |
| 1  | -5.648011 | -1.374114 | -3.509163 | 6              | -4.911564  | -4.243612 | -6.908605 |
| 46 | -4.711221 | -1.239262 | -0.766061 | 1              | -4.137736  | -2.419849 | -7.754840 |
| 15 | -5.881310 | -1.104463 | 1.235628  | 6              | -3.661576  | -5.180573 | -5.066138 |
| 6  | -6.812152 | -2.610089 | 1.718227  | 1              | -1.907968  | -4.073017 | -4.461073 |
| 6  | -6.509167 | -3.378640 | 2.847952  | 6              | -4.744372  | -5.234788 | -5.941730 |
| 6  | -7.803609 | -3.073133 | 0.835973  | 1              | -5.758299  | -4.283793 | -7.591415 |
| 6  | -7.174186 | -4.580703 | 3.087152  | 1              | -3.532246  | -5.948828 | -4.306274 |
| 1  | -5.751093 | -3.038672 | 3.552081  | 1              | -5.464227  | -6.047925 | -5.867515 |
| 6  | -8.474268 | -4.266833 | 1.082615  | 6              | -2.621212  | -0.330788 | -6.722186 |
| 1  | -8.052102 | -2.487611 | -0.051720 | 6              | -2.272563  | 0.427561  | -7.844941 |
| 6  | -8.156205 | -5.029187 | 2.207703  | 6              | -3.709877  | 0.070852  | -5.932984 |
| 1  | -6.925005 | -5.164484 | 3.971955  | 6              | -3.006347  | 1.566402  | -8.175081 |
| 1  | -9.242433 | -4.607838 | 0.390096  | 1              | -1.430405  | 0.128216  | -8.467992 |
| 1  | -8.674666 | -5.967722 | 2.396716  | 6              | -4.442819  | 1.202905  | -6.270759 |
| 6  | -4.963443 | -0.646276 | 2.755993  | 1              | -3.990021  | -0.513349 | -5.055598 |
| 6  | -5.305052 | 0.446614  | 3.561175  | 6              | -4.090959  | 1.954572  | -7.392571 |
| 6  | -3.807269 | -1.379614 | 3.071292  | 1              | -2.729813  | 2.147738  | -9.052825 |
| 6  | -4.515684 | 0.793870  | 4.656896  | 1              | -5.290700  | 1.499947  | -5.656275 |
| 1  | -6.192369 | 1.035708  | 3.333900  | 1              | -4.663665  | 2.842043  | -7.655167 |
|    |           |           |           | 6              | -0.549727  | -2.180756 | -7.572972 |

|    |           |           |            |                |           |           |           |
|----|-----------|-----------|------------|----------------|-----------|-----------|-----------|
| 6  | -0.932816 | -2.918832 | -8.699322  | 1              | 8.470060  | -0.748847 | 0.318280  |
| 6  | 0.763081  | -1.697360 | -7.480121  | 1              | 7.062410  | 3.225322  | -0.557077 |
| 6  | -0.014738 | -3.160999 | -9.717801  | 1              | 3.911367  | -1.026238 | 1.167796  |
| 1  | -1.948671 | -3.305031 | -8.780714  | 6              | -0.568696 | 2.350266  | 0.176501  |
| 6  | 1.676025  | -1.934007 | -8.503917  | 6              | -0.853625 | 3.490094  | -0.583823 |
| 1  | 1.062443  | -1.129290 | -6.595394  | 6              | -1.134175 | 2.223427  | 1.447456  |
| 6  | 1.286724  | -2.668609 | -9.622750  | 6              | -1.694657 | 4.479612  | -0.081916 |
| 1  | -0.316518 | -3.737584 | -10.590181 | 1              | -0.410192 | 3.598974  | -1.571987 |
| 1  | 2.692149  | -1.552301 | -8.424417  | 6              | -1.974869 | 3.213669  | 1.948881  |
| 1  | 2.000474  | -2.861273 | -10.421443 | 1              | -0.912033 | 1.333649  | 2.033417  |
| 6  | 0.889169  | 0.246735  | -2.434543  | 6              | -2.260394 | 4.344240  | 1.185897  |
| 6  | 0.526620  | -1.212324 | -2.188401  | 1              | -1.910609 | 5.361010  | -0.684047 |
| 1  | 1.944084  | 0.405324  | -2.170885  | 1              | -2.411953 | 3.098989  | 2.939708  |
| 1  | 0.783429  | 0.513251  | -3.497568  | 1              | -2.919984 | 5.117480  | 1.576660  |
| 8  | 0.090137  | 1.186079  | -1.745875  | 17             | 9.526581  | 1.769334  | -0.555166 |
| 6  | -0.807699 | -1.648416 | -2.106735  | 1              | -1.800789 | 0.137007  | -2.891700 |
| 6  | -1.833632 | -0.948339 | -2.791469  | 1              | -2.827879 | -1.393153 | -2.829658 |
| 1  | -1.013120 | -2.659243 | -1.754582  |                |           |           |           |
| 6  | 1.631258  | -2.142921 | -1.904920  | <b>3-TS6-2</b> |           |           |           |
| 6  | 1.479041  | -3.216161 | -1.011475  | 6              | -1.162555 | -0.818627 | -1.543881 |
| 6  | 2.884189  | -1.959110 | -2.521088  | 6              | -3.104527 | 0.127754  | -0.021331 |
| 6  | 2.543699  | -4.065214 | -0.734676  | 6              | -1.725899 | 0.727885  | 0.153378  |
| 1  | 0.535955  | -3.353199 | -0.486746  | 7              | -0.789196 | 0.241210  | -0.706339 |
| 6  | 3.942317  | -2.820770 | -2.254792  | 8              | -1.507256 | 1.616413  | 0.979680  |
| 1  | 3.024555  | -1.142942 | -3.229779  | 16             | -3.132281 | -1.031812 | -1.312655 |
| 6  | 3.778101  | -3.872782 | -1.354258  | 6              | -4.102356 | 0.563555  | 0.787804  |
| 1  | 2.413457  | -4.871759 | -0.015371  | 6              | -5.506897 | 0.224343  | 0.847764  |
| 1  | 4.901627  | -2.664131 | -2.744938  | 6              | -6.292894 | 0.853739  | 1.835929  |
| 1  | 4.611602  | -4.536181 | -1.130337  | 6              | -6.155434 | -0.686046 | -0.010165 |
| 6  | 0.356772  | 1.279477  | -0.346002  | 6              | -7.648681 | 0.597272  | 1.970881  |
| 6  | 2.713931  | 0.502197  | 0.523512   | 1              | -5.817731 | 1.562762  | 2.512944  |
| 6  | 1.497367  | -0.370281 | 0.845865   | 6              | -7.513123 | -0.952525 | 0.108614  |
| 7  | 0.349339  | 0.081789  | 0.325210   | 1              | -5.598545 | -1.201890 | -0.788907 |
| 8  | 1.641277  | -1.408983 | 1.507246   | 6              | -8.248878 | -0.308130 | 1.099205  |
| 16 | 2.237440  | 2.021611  | -0.157964  | 1              | -8.233716 | 1.092586  | 2.741713  |
| 6  | 3.945370  | -0.021947 | 0.738912   | 1              | -7.995630 | -1.657572 | -0.563593 |
| 6  | 5.268221  | 0.483166  | 0.442420   | 1              | -3.768334 | 1.304103  | 1.517328  |
| 6  | 6.351969  | -0.414849 | 0.541142   | 17             | -9.960411 | -0.643859 | 1.252200  |
| 6  | 5.559081  | 1.803718  | 0.045692   | 6              | -0.259145 | 1.678857  | -2.168349 |
| 6  | 7.652043  | -0.036580 | 0.241184   | 6              | -0.552455 | -2.160882 | -1.224327 |
| 1  | 6.156331  | -1.440210 | 0.855088   | 6              | -0.393872 | -3.129261 | -2.220414 |
| 6  | 6.856129  | 2.200926  | -0.255859  | 6              | -0.175839 | -2.459886 | 0.087721  |
| 1  | 4.763685  | 2.543651  | -0.016327  | 6              | 0.140455  | -4.376335 | -1.906064 |
| 6  | 7.891266  | 1.275247  | -0.161087  | 1              | -0.689276 | -2.904004 | -3.242844 |

|    |           |           |           |                |           |           |            |
|----|-----------|-----------|-----------|----------------|-----------|-----------|------------|
| 6  | 0.354089  | -3.708146 | 0.399463  | 1              | 2.960498  | 9.082488  | -6.489373  |
| 1  | -0.296628 | -1.706560 | 0.864514  | 1              | 3.622585  | 7.670464  | -2.478215  |
| 6  | 0.515396  | -4.670618 | -0.596445 | 1              | 3.932076  | 9.410667  | -4.226320  |
| 1  | 0.263897  | -5.121919 | -2.689858 | 6              | 1.266329  | 4.205237  | -7.057906  |
| 1  | 0.645587  | -3.928579 | 1.425031  | 6              | 0.598899  | 4.813984  | -8.129589  |
| 1  | 0.932107  | -5.646388 | -0.352330 | 6              | 2.227545  | 3.221031  | -7.321894  |
| 8  | -0.895969 | -0.519373 | -2.885395 | 6              | 0.896977  | 4.448624  | -9.440042  |
| 6  | -1.104366 | 0.861372  | -3.120810 | 1              | -0.158668 | 5.573959  | -7.937772  |
| 1  | -2.171750 | 1.095634  | -3.024186 | 6              | 2.528571  | 2.862051  | -8.633367  |
| 1  | -0.817884 | 1.038114  | -4.163123 | 1              | 2.735956  | 2.732043  | -6.489289  |
| 6  | 1.183017  | 1.499168  | -2.225344 | 6              | 1.863087  | 3.475475  | -9.693431  |
| 6  | -0.784434 | 2.951644  | -1.635747 | 1              | 0.373549  | 4.926985  | -10.265960 |
| 6  | 0.098562  | 3.942637  | -1.143989 | 1              | 3.277633  | 2.096117  | -8.825879  |
| 6  | -2.161134 | 3.254641  | -1.650511 | 1              | 2.092934  | 3.190873  | -10.718630 |
| 6  | -0.375016 | 5.180726  | -0.721164 | 1              | 2.909594  | 0.915292  | -3.358616  |
| 1  | 1.165695  | 3.740929  | -1.069506 | 1              | 1.306677  | 0.483418  | -4.152520  |
| 6  | -2.627137 | 4.489744  | -1.220850 | 1              | 1.773395  | 1.787895  | -1.356553  |
| 1  | -2.886781 | 2.516689  | -1.984284 |                |           |           |            |
| 6  | -1.738348 | 5.461982  | -0.760875 |                |           |           |            |
| 1  | 0.329913  | 5.923841  | -0.353056 | <b>3-IM8-2</b> |           |           |            |
| 1  | -3.696339 | 4.692314  | -1.238536 | 6              | -1.714477 | 0.059593  | -1.909253  |
| 1  | -2.108986 | 6.428893  | -0.425863 | 6              | -3.643128 | 0.391328  | -0.161455  |
| 6  | 1.828238  | 1.038575  | -3.375045 | 6              | -2.550444 | 1.402100  | -0.064396  |
| 46 | 1.083621  | 3.104445  | -3.611231 | 7              | -1.532672 | 1.149327  | -0.970959  |
| 15 | 0.957810  | 4.656997  | -5.313883 | 8              | -2.556279 | 2.320231  | 0.741292   |
| 6  | -0.781510 | 5.233020  | -5.302742 | 16             | -3.452719 | -0.637568 | -1.555500  |
| 6  | -1.162219 | 6.479671  | -4.793791 | 6              | -4.623242 | 0.419371  | 0.772522   |
| 6  | -1.778354 | 4.334757  | -5.717874 | 6              | -5.807731 | -0.386444 | 0.958936   |
| 6  | -2.511416 | 6.825479  | -4.713971 | 6              | -6.628145 | -0.073673 | 2.061805   |
| 1  | -0.405889 | 7.189822  | -4.460119 | 6              | -6.198453 | -1.463863 | 0.140002   |
| 6  | -3.121695 | 4.685031  | -5.641761 | 6              | -7.778574 | -0.791411 | 2.346073   |
| 1  | -1.494514 | 3.354612  | -6.104982 | 1              | -6.346452 | 0.756113  | 2.708651   |
| 6  | -3.492355 | 5.933627  | -5.138875 | 6              | -7.346873 | -2.195771 | 0.412486   |
| 1  | -2.793453 | 7.800892  | -4.320725 | 1              | -5.602428 | -1.752116 | -0.723079  |
| 1  | -3.882422 | 3.981453  | -5.976081 | 6              | -8.126733 | -1.852941 | 1.514460   |
| 1  | -4.544106 | 6.207046  | -5.077706 | 1              | -8.396679 | -0.533825 | 3.201845   |
| 6  | 1.930906  | 6.179612  | -5.036536 | 1              | -7.633085 | -3.028171 | -0.225266  |
| 6  | 2.107912  | 7.165384  | -6.015383 | 1              | -4.473644 | 1.200763  | 1.519891   |
| 6  | 2.483504  | 6.371618  | -3.763839 | 17             | -9.572930 | -2.771588 | 1.861757   |
| 6  | 2.825476  | 8.321777  | -5.722486 | 6              | -0.773699 | 2.211200  | -1.734090  |
| 1  | 1.681494  | 7.028972  | -7.009431 | 6              | -0.723125 | -1.072667 | -1.768602  |
| 6  | 3.196257  | 7.531576  | -3.470090 | 6              | -0.371090 | -1.837183 | -2.883840  |
| 1  | 2.350454  | 5.595045  | -3.006050 | 6              | -0.162810 | -1.367977 | -0.523791  |
| 6  | 3.369392  | 8.506266  | -4.451004 | 6              | 0.547949  | -2.875303 | -2.755394  |
|    |           |           |           | 1              | -0.804963 | -1.607525 | -3.854985  |

|    |           |           |           |   |           |          |           |
|----|-----------|-----------|-----------|---|-----------|----------|-----------|
| 6  | 0.761761  | -2.401121 | -0.401165 | 1 | 2.007141  | 5.890548 | -0.961470 |
| 1  | -0.439215 | -0.774784 | 0.346819  | 6 | 4.571955  | 8.066125 | -0.427083 |
| 6  | 1.121926  | -3.156234 | -1.516545 | 1 | 6.109805  | 8.534854 | -1.864041 |
| 1  | 0.821365  | -3.462402 | -3.630342 | 1 | 2.918075  | 7.399045 | 0.793816  |
| 1  | 1.204856  | -2.614308 | 0.570062  | 1 | 4.983711  | 8.717390 | 0.342108  |
| 1  | 1.847157  | -3.962119 | -1.419805 | 6 | 4.068555  | 4.914677 | -4.811641 |
| 8  | -1.626086 | 0.612228  | -3.195705 | 6 | 4.390371  | 5.695218 | -5.928406 |
| 6  | -1.503715 | 2.029499  | -3.064060 | 6 | 4.839130  | 3.778872 | -4.528876 |
| 1  | -2.500531 | 2.492964  | -3.027415 | 6 | 5.469196  | 5.345871 | -6.740146 |
| 1  | -0.961017 | 2.398064  | -3.940471 | 1 | 3.799728  | 6.581944 | -6.161332 |
| 6  | 0.692985  | 1.815084  | -1.798487 | 6 | 5.923944  | 3.439797 | -5.330819 |
| 6  | -0.834015 | 3.617281  | -1.158461 | 1 | 4.573087  | 3.158246 | -3.670302 |
| 6  | -0.233146 | 3.900460  | 0.078970  | 6 | 6.239287  | 4.223194 | -6.440668 |
| 6  | -1.357199 | 4.680033  | -1.903947 | 1 | 5.711279  | 5.957120 | -7.608043 |
| 6  | -0.195681 | 5.198682  | 0.570603  | 1 | 6.517343  | 2.557802 | -5.095796 |
| 1  | 0.182042  | 3.085989  | 0.670504  | 1 | 7.082467  | 3.955811 | -7.075225 |
| 6  | -1.306686 | 5.987761  | -1.415115 | 6 | 1.618325  | 6.454731 | -4.561149 |
| 1  | -1.800475 | 4.502996  | -2.882571 | 6 | 1.729581  | 7.848525 | -4.486064 |
| 6  | -0.734735 | 6.250566  | -0.174840 | 6 | 0.580046  | 5.900715 | -5.326159 |
| 1  | 0.262799  | 5.393710  | 1.539099  | 6 | 0.821401  | 8.667910 | -5.154797 |
| 1  | -1.714235 | 6.798817  | -2.017427 | 1 | 2.527681  | 8.302470 | -3.899184 |
| 1  | -0.696258 | 7.269146  | 0.208245  | 6 | -0.319851 | 6.719418 | -6.001560 |
| 6  | 1.391249  | 1.420458  | -2.934108 | 1 | 0.473340  | 4.815116 | -5.378564 |
| 46 | 1.642662  | 3.557829  | -2.628718 | 6 | -0.204565 | 8.106740 | -5.911772 |
| 15 | 2.711827  | 5.300343  | -3.642293 | 1 | 0.917444  | 9.749935 | -5.081523 |
| 6  | 3.519556  | 6.392152  | -2.410723 | 1 | -1.120671 | 6.273466 | -6.589234 |
| 6  | 4.680746  | 7.133684  | -2.655300 | 1 | -0.916546 | 8.748559 | -6.427980 |
| 6  | 2.900835  | 6.489625  | -1.157181 | 1 | 2.356505  | 0.927094 | -2.817566 |
| 6  | 5.204697  | 7.963112  | -1.665023 | 1 | 0.897426  | 1.248971 | -3.890694 |
| 1  | 5.175300  | 7.068200  | -3.624702 | 1 | 1.141685  | 1.647605 | -0.816504 |
| 6  | 3.415006  | 7.328917  | -0.173340 |   |           |          |           |

---

## 15. References

- 1 (a) M. S. G. Ahlquist and P.-O. Norrby, Dispersion and back-Donation gives tetracoordinate  $[\text{Pd}(\text{PPh}_3)_4]$ , *Angew. Chem. Int. Ed.*, 2011, **50**, 11794–11797; (b) M. Ahlquist, P. Fristrup, D. Tanner and P.-O. Norrby, Theoretical evidence for low-ligated palladium(0):  $[\text{Pd-L}]$  as the active species in oxidative addition reactions, *Organometallics*, 2006, **25**, 2066–2073.
- 2 Y. Liu, Q. W. Huang, Q. Z. Li, H. J. Leng, Q. S. Dai, R. Zeng, Y. Q. Liu, X. Zhang, B. Han and J. L. Li, Highly chemo- and diastereoselective construction of quaternary stereocenters through palladium-catalyzed  $[3 + 2]$  cyclization of 5-alkenyl thiazolones, *Org. Lett.*, 2019, **21**, 7478–7483.
- 3 (a) M. Esseffar, C. A. Parish, R. Jalal and A. M. Lamsabhi, A computational study of the reactivity of 3,5-(oxo/thioxo) derivatives of 2,7-dimethyl-1,2,4-triazepines. Keto–enol tautomerization and potential for hydrogen storage, *J. Phys. Chem. A*, 2018, **122**, 3076–3086; (b) R. Bianchi, G. Gervasio and D. Marabello, Experimental electron density analysis of  $\text{Mn}_2(\text{CO})_{10}$ : metal-metal and metal-ligand bond characterization, *Inorg. Chem.*, 2000, **39**, 2360–2366; (c) S. Emamian, T. Lu, H. Kruse and H. Emamian, Exploring nature and predicting strength of hydrogen bonds: a correlation analysis between atoms-in-molecules descriptors, binding energies, and energy components of symmetry-adapted perturbation theory, *J. Comput. Chem.*, 2019, **40**, 2868–2881.
- 4 E. V. D. Anslын, D. A., Modern physical organic chemistry, *University Science Books: Sausalito, CA*, 2006.
- 5 S. T. Schneebeli, M. L. Hall, R. Breslow and R. Friesner, Quantitative DFT modeling of the enantiomeric excess for dioxirane-catalyzed epoxidations, *J. Am. Chem. Soc.*, 2009, **131**, 3965–3973.
- 6 E. D. Entz,, J. E. A. Russell, L. V. Hooker, S. R. Neufeldt, Small phosphine ligands enable selective oxidative addition of Ar-O over Ar-Cl bonds at nickel(0). *J. Am. Chem. Soc.* 2020, **142**, 15454–15463.
- 7 W. Kohn, L. J. Sham, *Phys. Rev.*, 1965, **140**, 1133–1138.
- 8 (a) L. R. M. Domingo, J. Aurell, P. Perez, *Org. Biomol. Chem.* 2014, **12**, 7581–7590; (b) L. R. M. Domingo, J. A. Saez, *Org. Biomol. Chem.* 2009, **7**, 3576–3583; (c) L. R. Domingo, E. Chamorro and P. Pérez, Understanding the reactivity of captodative ethylenes in polar cycloaddition reactions. a theoretical study, *J. Org. Chem.*, 2008, **73**, 4615–4624.
- 9 L. R. Domingo, P. Pérez and J. A. Sáez, Understanding the local reactivity in polar organic reactions through electrophilic and nucleophilic Parr functions, *RSC Adv.*, 2013, **3**, 1486–1494
- 10 (a) H. Eyring, The activated complex in chemical reactions. *J. Chem. Phys.* 1935, **3**, 107–115. (b) E. Wigner, Calculation of the rate of elementary association reactions. *J. Chem. Phys.* 1937, **5**, 720–725. (b) S. Kozuch, and S. Shaik, A combined kinetic–quantum mechanical model for assessment of catalytic cycles: application to cross-coupling and Heck reactions. *J. Am. Chem. Soc.* 2006, **128**, 3355–3365.
- 11 (a) S. Kozuch, S. Shaik, Kinetic-quantum chemical model for catalytic cycles: The Haber–Bosch process and the effect of reagent concentration. *J. Phys. Chem. A* 2008, **112**, 6032–6041; (b) Uhe, A.; Kozuch, S.; Shaik, S. Automatic analysis of computed catalytic cycles. *J. Comput. Chem.* 2011, **32**, 978–985; (c) S. Kozuch, S. Shaik, How to conceptualize catalytic cycles? The energetic span model. *Acc. Chem. Res.* 2011, **44**, 101–110.



- 
- 12 (a) C. Amatore, A. Jutand, Mechanistic and kinetic studies of palladium catalytic systems. *J. Organomet. Chem.* 1999, **576**, 254–278; (b) S. Kozuch, Steady state kinetics of any catalytic network: graph theory, the energy span model, the analogy between catalysis and electrical circuits, and the meaning of “mechanism”. *ACS Catal.* 2015, **5**, 5242–5255.
- 13 (a) F. M. J. Bickelhaupt, *Comput. Chem.*, 1999, **20**, 114-128.48; (b) W.-J. van Zeistand, F. M. Bickelhaupt, The activation strain model of chemical reactivity, *Org. Biomol. Chem.*, 2010, **8**, 3118–3127; (c) F. Matthias Bickelhaupt and N. Houk Kendall, Analyzing reaction rates with the distortion/interaction-activation strain model, *Angew. Chem. Int. Ed.* 2017, **56**, 10070–10086.
